# Supplementary material for: Photoinduced regioselective olefination of arenes at proximal and distal sites
Source: Research Square preprint supplement (doi:10.21203/rs.3.rs-118633/v1), 2020-12-09
Supplement: Supplementary file 2 [file 041d041398fdb48f67a7573b.docx]

**Supplementary Information**

**Photoinduced Regioselective Olefination of Arenes at Proximal and Distal Sites**

Argha Saha1, Srimanta Guin1, Wajid Ali1, Trisha Bhattacharya1, Sheuli Sasmal1, Nupur Goswami1, Gaurav Prakash1, Soumya Kumar Sinha1, [Hediyala B. Chandrashekar](https://chemistry-europe.onlinelibrary.wiley.com/action/doSearch?ContribAuthorStored=Chandrashekar%2C+Hediyala+B) 1, [S. S. Anjana](https://onlinelibrary.wiley.com/action/doSearch?ContribAuthorStored=Anjana%2C+S+S) 1 & Debabrata Maiti1*

1*Department of Chemistry, Indian Institute of Technology Bombay, Powai, Mumbai 400076, India*

* *Email:* [*dmaiti@chem.iitb.ac.in*](mailto:dmaiti@chem.iitb.ac.in)

**Table of Contents**

| **Section** |  | **Title** | **Page No** |
| --- | --- | --- | --- |
| **1** |  | General consideration | **S4 - S5** |
| **2** |  | Experimental section | **S5** |
|  | **2.1** | Preparation of starting materials for non-directed C−H olefination | **S5** |
|  | **2.2** | Preparation of starting materials for *ortho*-C−H olefination of anilides | **S5 - S6** |
|  | **2.3** | Preparation of starting materials for *ortho*-C−H olefination of silanols | **S6 – S7** |
|  | **2.4** | Preparation of starting materials for atropisomerization of biaryls | **S7 – S8** |
|  | **2.5** | Preparation of starting materials for *meta*-C−H olefination | **S8 – S11** |
|  | **2.6** | Preparation of starting materials for *para*-C−H olefination | **S12 – S14** |
|  | **2.7** | Optimization details for non-directed C−H olefination | **S14 – S19** |
|  | **2.8** | Optimization details for *ortho*-C−H olefination of anilides | **S19-S24** |
|  | **2.9** | Optimization details for *ortho*-C−H olefination of silanols | **S24 – S29** |
|  | **2.10** | Optimization details for atropisomerization of biaryls | **S29 – S32** |
|  | **2.11** | Optimization details for *meta*-C−H olefination | **S32 – S37** |
|  | **2.12** | Optimization details for *para*-C−H olefination | **S37 – S42** |
|  | **2.13** | General procedure for non-directed olefination | **S42** |
|  | **2.14** | General procedure for *ortho*-C−H olefination of anilides | **S42 – S43** |
|  | **2.15** | General procedure for *ortho*-C−H olefination of silanols | **S43** |
|  | **2.16** | General procedure for atropisomerization of biaryls | **S44** |
|  | **2.17** | General procedure for *meta*-C−H olefination | **S44 – S47** |
|  | **2.18** | General procedure for *para*-C−H olefination | **S47** |
|  | **2.19** | Characterization data of non-directed olefinated products of simple **(**hetero**)**arenes | **S48 – S70** |
|  | **2.20** | Characterization data of *ortho*-C−H olefinated products of anilides | **S70 – S74** |
|  | **2.21** | Characterization data of *ortho*-C−H olefinated products of silanols | **S74 – S75** |
|  | **2.22** | Characterization data of atropisomerization of biaryls | **S75 – S76** |
|  | **2.23** | Characterization data of *meta*-olefinated products | **S77 – S87** |
|  | **2.24** | Characterization data of *para*-olefinated products | **S87 – S93** |
|  | **2.25** | Characterization data of phenol natural products | **S94 – S98** |
|  | **2.26** | Characterization data of Late-Stage Functionalization of drugs | **S98 – S105** |
|  | **2.27** | Procedure for the Preparation of [Pd3(L10)6] Complex | **S105** |
| **3** |  | Mechanistic Studies | **S-106** |
|  | **3.1** | Control experiments | **S106** |
|  | **3.2** | Role of visible light in activation | **S107 – S108** |
|  | **3.3** | Radical Inhibitor | **S109** |
|  | **3.4** | KIE Experiments | **S109 - S110** |
|  | **3.5** | On/Off experiment | **S111** |
|  | **3.6** | UV-visible Absorption experiment | **S111 - S113** |
|  | **3.7** | X-Ray Structure of [Pd3(L10)6] Complex | **S113 - S114** |
|  | **3.8** | Fukui value calculations | **S114 - S116** |
| **4** |  | References | **S 116 – S118** |
| **5** |  | NMR Spectra | **S119 – S235** |
| **6** |  | Chromatogram of HPLC Analysis: | **S236 – S237** |

**1. General Consideration:**

**Reagent Information.** All the reactions were carried out in screw cap reaction tubes under aerobic condition, unless otherwise stated. All the chemicals were purchased from Sigma Aldrich, Alfa Aesar and TCI-India. Solvents were bought from commercial sources and were used without further purification. Silica gel (100–200 mesh) was used for column chromatography obtained from Merck. Petroleum ether and ethyl acetate mixture was used as a gradient elution for column chromatography. A gradient elution using petroleum ether and ethyl acetate was performed, based on Merck aluminum TLC sheets (silica gel 60F254).

**Analytical Information.** All isolated compounds were characterized by 1H NMR, 13C NMR spectroscopy, and HRMS. Unless otherwise stated, all Nuclear Magnetic Resonance spectra were recorded on a Bruker 400 MHz and 500 MHz instrument. NMR spectra are reported in parts per million (ppm), and were measured relative to the signals for residual solvent in the deuterated solvent, unless otherwise stated. All NMR analysis were performed with 1,3,5-trimthoxybenzene as the internal standard. All 13C NMR spectra were obtained with 1H decoupling. High-resolution mass spectra (HRMS) were recorded on a micro-mass ESI TOF (time of flight) mass spectrometer. UV/vis absorption spectra were recorded on Agilent Cary 8454 UV-Vis spectrophotometer, equipped with a temperature control unit at 25 °C. The samples were measured in quartz cuvettes (chamber volume = 3.0 mL) fitted with a stopper.

**Description of Reaction Tube:**


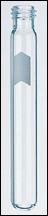


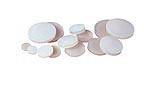
**Figure 1.** Pictorial description of reaction tube for photoredox olefination: Fisher brand Disposable Borosilicate Glass Tubes (16*125mm) with Threaded End (Fisher Scientific, Order No. 1495935A) [left]; Kimble Black Phenolic Screw Thread Closures with Open Tops (Fisher Scientific Order No. 033407E) [left]; Thermo Scientific National PTFE/Silicone Septa for Sample Screw Thread Caps (Fisher Scientific Order No. 03394A) [left].

A custom-made light set-up was used with 4 CFL bulbs arranged around the reaction tubes. A fan attached to the apparatus was used to maintain the temperature at 30 °C. For irradiation with CFL bulbs, the reaction tubes were placed between light sources (~ 3 cm distance between the light source and the tube).


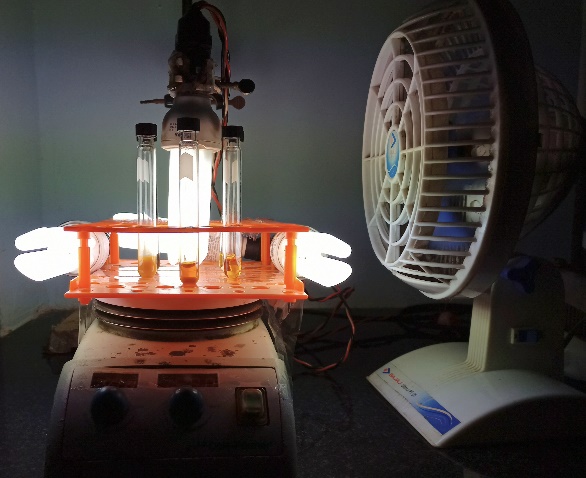


**Figure S1:** Photograph of the light set used for irradiation of the reaction solutions

**2. Experimental Section**

**2.1. Preparation of starting materials for non-directed C−H olefination:**

To a suspension of substrate(2.0 mmol) and K2CO3 (2.0 equiv.) in DMF (3.0 mL) was added MeI (2.0 equiv.) at room temperature. After the reaction completed, the reaction was dilute with ethyl acetate (40 mL), and then washed with cold water. The organic phase was dried over anhydrous Na2SO4, filtered and concentrated under vacuum. The resulting mixture was purified by silica gel column chromatography.

To a suspension of substrate(2.0 mmol) and NaH (2.0 equiv.) in DMF (3.0 mL) was added MeI (2.0 equiv.) at room temperature. After the reaction completed, the reaction was dilute with ethyl acetate (40 mL), and then washed with cold water. The organic phase was dried over anhydrous Na2SO4, filtered and concentrated under vacuum. The resulting mixture was purified by silica gel column chromatography.

**2.2. Preparation of starting materials for *ortho*-C−H olefination of anilides:**

**A. General synthesis of acetanilides:**

An oven dried clean round bottom flask was charged with magnetic stir-bar, aniline (1.0 mmol) was taken and dissolved in 10 mL of THF. Then the round bottom flask was placed in an ice bath and acetic anhydride (10.0 equiv.) was added dropwise. Then the reaction mixture was allowed to stir at room temperature for 2 h. After the reaction was completed the solvent was evaporated under reduced pressure and purified by column chromatography using silica gel (100-200 mesh size) and petroleum ether / ethyl acetate as the eluent.

**B. General synthesis of pivlamide:**

An oven dried clean round bottom flask was charged with magnetic stir-bar, aniline (1.0 mmol) was taken and dissolved in 10 ml of DCM. Then the round bottom flask was placed in an ice bath. After that, Et3N (10.0 equiv.) and pivaloyl chloride (5.0 equiv.) was added successively. Then the reaction mixture was allowed to stir at room temperature for 4 h. After 4 h the reaction was taken out and solvent was evaporated under reduced pressure to obtained the residue. The residue was further purified by column chromatography using silica gel (100-200 mesh size) and petroleum ether / ethyl acetate as the eluent.

All the synthesized acetanilides and pivlamides were characterized by 1H and 13C NMR spectroscopy and characterization data were matched with previous reports1.

**2.3. Preparation of starting materials for *ortho*-C−H olefination of silanols:**

**Step 1: Preparation of Grignard Reagent**

A 50 mL oven-dried flask was charged with Mg (5.5 mmol) and 5 mL of anhydrous ethyl ether. A solution of **A** (5.0 mmol) in 20 mL of Et2O was added dropwise during a period of 30-50 min at 0 °C. After addition, the reaction mixture was refluxed for 3 hours to obtain the corresponding Grignard Reagent.

**Step 2:**

The resulting Grignard Reagent was added dropwise to a solution of dichlorodiisopropylsilane (1.85 g, 10.0 mmol) in 10 mL of THF at 0 °C, and then the solution was refluxed for 12 hours. The reaction mixture was cooled to room temperature, and then added slowly to a mixture of TEA (5 mL), brine (15 mL) and diethyl ether (40 mL) at 0 °C. After vigorously stirring at room temperature for 1 h, the reaction mixture was extracted with diethyl ether (30 mL x 2). The combined organic layers were dried over anhydrous Na2SO4 and then concentrated to dryness. The residue was purified by flash column chromatography (Eluent: petroleum ether / ethyl acetate) to give **B**.

All the silanol derivatives were synthesized following the above procedures and characterized by 1H and 13C NMR spectroscopy, matched with the previous reports2.

**2.4. Preparation of starting materials for atropisomerization of biaryls:**

**Step 1:** In an oven dried round bottom flask charged with a solution of 3,4-dimethoxy-2-bromobenzaldehyde (10.5 mmol) and Pd(PPh3)4 (346.7 mg, 3 mol%) in DME (25 mL). A solution of Na2CO3 (2.2 g, 21 mmol) in H2O (10 mL) and a solution of the corresponding boronic acid (11.5 mmol) in MeOH (8 mL) were sequentially added. The reaction mixture was stirred at 80 °C overnight. After cooling to room temperature, the reaction mixture was quenched with H2O (20 mL) and extracted with CH2Cl2 (3 × 20 mL). The combined organic layers were dried over anhydrous Na2SO4, filtered, concentrated, and was further purified by column chromatography using silica gel (100-200 mesh size) and petroleum ether/ ethyl acetate as the eluent.

**Step 2:** An oven dried clean round bottom flask was charged with magnetic stir-bar, the corresponding coupling product (6.0 mmol) and methoxy amine hydrochloride (1.5 equiv.) was taken and dissolved in 25 ml of DCM. Then the round bottom flask was placed in an ice bath. After that, Et3N (10.0 equiv.) was added and allowed to stir at room temperature for overnight. After that, the reaction was taken out and solvent was evaporated under reduced pressure to obtained the residue. The residue was further purified by column chromatography using silica gel (100-200 mesh size) and petroleum ether/ ethyl acetate as the eluent.

**2.5. Preparation of starting materials for *meta*-C−H olefination:**

**2.5.1. Synthesis of the directing group:**

In an oven dried round bottom flask (250 mL), charged with stir-bar, corresponding aldehyde (20.0 mmol) and NaN3 (3.0 equiv.) were taken CH3CN (60 mL) was added to it and stirred at room temperature for 15 min. After that 3.5 equiv. of triflic acid was added to the mixture in portion wise. After the addition the reaction was allowed to stir at room temperature for 12 h. Upon completion, the solvent was removed under reduced pressure. The solid residue was dissolved in ethyl acetate and washed with saturated NaHCO3 solution (3 times). The organic fraction was then dried over anhydrous Na2SO4 and purified through column chromatography.

**2.5.1.A. General synthesis of sulfonyl ester scaffolds:**

**Step 1: Preparation of phenylsulfonyl chloride:**

An oven dried clean round bottom flask was charged with magnetic stir-bar, benzyl chloride/bromide (10.0 mmol) and thiourea (10.0 mmol, 760 mg). 10 mL of absolute ethanol was added and refluxed at 96 C. After 3 h the reaction was taken out and solvent was evaporated under reduced pressure to obtained white solid thiouric salt. The obtained solid salt was suspended in 14 mL of CH3CN and 3 mL (2N HCl) was added to it. The mixture was stirred at 0 C for 15 min. *N*-chlorosuccinimide (NCS) (40.0 mmol; 5.34 g) was added in portion to the suspension in order to obtain a clear solution. The solution was stirred for another 30 min at room temperature. Then the solution was evaporated under reduced pressure to remove the CH3CN. The remaining aqueous portion was extracted with ethyl acetate and dried over anhydrous Na2SO4 and purified by column chromatography using silica gel (100-200 mesh size) and petroleum ether/ ethyl acetate as the eluent.

**Step 2:** To an ice-cold solution of 2-hydroxy-4-methoxybenzonitrile (5.0 mmol) and TEA (1.5 equiv., 1.04 mL) in 10 mL dichloromethane under nitrogen atmosphere, phenylsulfonyl chloride was added portion wise. Stirring was continued for additional 20 min, after that the ice bath was removed and the reaction mixture was left overnight at room temperature. After completion of the reaction DCM was removed under reduced pressure and the residue was extracted with ethyl acetate (3 x 20 mL). The organic layer was dried over anhydrous Na2SO4. After filtration and evaporation of the solvent, the crude mixture was purified by column chromatography using neutral alumina and petroleum ether / ethyl acetate (85/15, v/v) as the eluent.

**2.5.1.B. General synthesis of benzyl silane scaffolds:**

**Step 1: Preparation of benzyldiisopropylsilane derivatives:**

To a mixture of magnesium turnings (9.0 mmol, 218 mg) and a crystal of iodine under nitrogen

atmosphere dry THF (8 mL) was added and stirred for 10 min at room temperature. Chlorodiisopropylsilane (3.0 mmol, 512 μL) was added drop wise, followed by drop wise addition of corresponding benzyl halide (3 mmol) in dry THF (4 mL) at 0 °C. After stirring for 2 h at room temperature, the reaction was quenched by addition of brine solution (15 mL) and was extracted by ethyl acetate (10 x 3). Combined organic extracts was dried over anhydrous Na2SO4 and concentrated under reduced pressure to give crude benzyldiisopropylsilane.

**Step 2:**

To a suspension of NBS (3.3 mmol, 588 mg) in dry DCM (5 mL) was slowly added crude benzyldiisopropylsilane (3.0 mmol) in dry DCM (5 mL) at 0 °C under nitrogen atmosphere. After stirring at room temperature for 30 min, the resulting solution was transferred via syringe to a stirred solution of 2-hydroxy-4-methoxybenzonitrile (3.0 mmol), DMAP (0.3 mmol, 37 mg), and Et3N (3.3 mmol, 460 μL) in dry DCM (5 mL) at 0 °C under nitrogen atmosphere. The mixture was stirred at room temperature for 2 h. After completion of the reaction, DCM was removed and petroleum ether (20 x 3) was added and filtered through celite. Removal of solvent to afford crude product, which was further purified by silica gel column chromatography.

**2.5.1.C. General synthesis of Phosphonate ester scaffolds:**

**Step 1: Preparation of diethyl benzylic phosphonates:**

An oven dried clean round bottom flask with magnetic stir-bar was charged with benzyl bromide derivatives (1.0 mmol), P(OEt)3 (1.2 mmol) and 5 mL of dry DCM and stirred at room temperature in the presence of catalytic amount of ZnI2 (0.2 mmol). After 6 h the reaction was taken out and evaporated under reduced pressure to obtained crude materials which was then purified by column chromatography as petroleum ether / ethyl acetate as the eluent.

**Step 2: Preparation of Phosphonyl chloride:**

An oven dried clean round bottom flask was charged with magnetic stir-bar and diethyl benzylicphosphonates, and then SOCl2 was added as a solvent amount to the reaction mixture and stirredat reflux condition. After 3 h the excess amount of SOCl2 was removed by rotavapor and thecrude phosphonyl chloride derivatives was charged for next step esterification.

**Step 3.**

Under nitrogen atmosphere Et3N was added to the 2-hydroxy-4-methoxybenzonitrile solution in DCM. Thereaction was stirred at 0 °C for 10 mins. Under nitrogen atmosphere Phosphonyl chloride wasadded to the reaction in portion until effervescence stopped and then transferred to roomtemperature and stirred overnight. The progress of the reaction was monitored by TLC. Uponcompletion the reaction was quenched by adding water and the desired compound was extractedwith ethyl acetate. Combined organic portion was dried over anhydrous Na2SO4. The crudemixture was concentrated under reduced pressure and purified by column chromatography usingsilica gel (100-200 mesh size) and petroleum ether / ethyl acetate as the eluent.

**2.5.1.D. General synthesis of biphenyl ester scaffolds:**

To an oven dried flask was added the carboxylic acid (10.0 mmol), DCC (1.1 equiv.), DMAP (30 mol%) and DCM solvent. The reaction was kept at 0 °C for 30 min and then the alcohol (20.0 mmol, 2.0 equiv.) was added. The reaction was brought to rt and left for overnight stirring. Work-up with brine and isolation through alumina column gave the desired ester product.

**2.5.1.E. General synthesis of long chain carbonyl ether scaffolds:**

**Step 1.** A clean, oven-dried screw cap reaction tube with previously placed magnetic stir–bar was charged with corresponding carboxylic acid (1.0 equiv.), and respective alkyl bromo alcohol (1.4 equiv.). After that, DCC (2.5 equiv.), was added successively with addition of 5 mL DCM to the reaction mixture. The cap was fitted with a rubber septum and the reaction mixture was vigorously stirred at room temperature for 14 h. Reaction mixture was dried under rotary evaporator. The reaction mixture was extracted thrice with DCM (3 x 20 mL) and brine solution (3 x 10 mL). The organic layer was collected and dried over anhydrous Na2SO4. The solvent was evaporated under reduced pressure. The crude mixture was purified by column chromatography using neutral alumina and petroleum ether / ethyl acetate (95/5, v/v) as the eluent.

**Step 2.** A clean, oven-dried screw cap reaction tube with previously placed magnetic stir–bar was charged with 2-hydroxy-4-methoxybenzonitrile (1.0 equiv.) and K2CO3 (2.0 equiv.). The cap was fitted with a rubber septum and the reaction tube was evacuated and back filled with nitrogen and this sequence was repeated three additional times. Now under the positive flow of nitrogen 6 mL acetone was added to the reaction mixture. Then, phenyl alkyl bromide (1.2 equiv.) was added by using syringe. The reaction mixture was vigorously stirred at 70 oC for 24 h. Reaction mixture was dried under rotary evaporator. The reaction mixture was extracted thrice with ethyl acetate (3 x 20 mL) and brine solution (3 x 10 mL). The organic layer was collected and dried over anhydrous Na2SO4. The solvent was evaporated under reduced pressure. The crude mixture was purified by column chromatography using neutral alumina and petroleum ether / ethyl acetate (95/5, v/v) as the eluent.

All the synthesized scaffolds were characterized by 1H and 13C NMR spectroscopy and characterization data were matched with previous reports.3

**2.6. Preparation of Starting materials for *para*-C−H olefination:**

**2.6.1. General synthesis of directing group and scaffolds:**

**Step 1:** In an oven dried round bottom flask (250 mL), charged with stir-bar, corresponding aldehyde (20.0 mmol) and NaN3 (3.0 equiv.) were taken CH3CN (60 mL) was added to it and stirred at room temperature for 15 min. After that 3.5 equiv. of triflic acid was added to the mixture in portion wise. After the addition the reaction was allowed to stir at room temperature for 12 h. Upon completion, the solvent was removed under reduced pressure. The solid residue was dissolved in ethyl acetate and washed with saturated NaHCO3 solution (3 times). The organic fraction was then dried over anhydrous Na2SO4 and purified through column chromatography.

**Step 2**:In an oven dried reaction tube, charged with stir-bar, Pd (OAc)2 (3 mol%), S-phos (6 mol%), **B1** (3.0 mmol), 4-hydroxyphenyl boronic acid (3.5 mmol) and K3PO4 (3.0 equiv.) were added. The reaction tubes were capped with Teflon cap and purged with N2. THF was added to the reaction mixture (5 mL) and placed in a preheated 100 °C in oil bath and allowed for vigorous stirring for 24 h. After 24 h, reaction mixture was allowed to cool and diluted with ethyl acetate and extracted with brine solution. The organic layer was dried over Na2SO4and concentrated by evaporation. Concentrated organic part was purified by column chromatography. Pale yellow crystalline compound was isolated in 75% yields using ethyl acetate and petroleum ether (20:80) as an eluent.

**Step 3**:In a clean, oven-dried screw cap reaction tube, charged with magnetic stir–bar, activated magnesium turnings (15.0 mmol, 3.0 equiv.) and I2 (one bead) were taken. The reaction tube was evacuated and back filled with nitrogen three times. Dry THF (15 mL) was added to it followed by di-isopropylchlorosilane (6.0 mmol, 1.2 equiv.) in drop wise fashion and stirred at room temperature for 15 min. A solution of benzyl chloride/bromide (5.0 mmol) in dry THF (10 mL) was added to the solution drop wise over a period of 15 min, under ice cold condition. The mixture was vigorously stirred for 3 hours. Upon completion, the reaction mixture was quenched and washed with brine solution (3 x 10 mL). Aqueous part was washed thrice with ethyl acetate (3 x 20 mL). The combined organic layer was then dried over anhydrous Na2SO4. The compound (**F1**) was purified using chromatography [silica gel (60-120/100-200 mesh size)] and petroleum ether as the eluent. Benzyldiisopropylsilane (**F1**) was collected and used for next step.

**Step 4**:To an ice-cold suspension of *N*-bromosuccinimide (5.0 mmol, 1.0 equiv.) in 10 mL dry DCM, benzyldiisopropylsilane (**F1**) (5.0 mmol, 1.0 equiv.) was added drop wise under N2 atmosphere. The reaction was kept on stirring for 3 h at room temperature. In another clean round bottomed flask, charged with magnetic stir–bar, 4'-hydroxy-4, 5-dimethoxybiphenyl-2-carbonitrile (**D1**) (5.0 mmol, 1.0 equiv.) and 4-dimethylaminopyridine (10 mol%) were taken. The set up was evacuated and refilled with N2. 5 mL dry DCM was added to the mixture followed by TEA (15.0 mmol, 3.0 equiv.) in a drop wise fashion. The entire solution was kept for stirring at room temperature until 4'-hydroxy-4,5-dimethoxybiphenyl-2-carbonitrile gets dissolved completely. The aforementioned solution of benzylbromodiisopropylsilane was added drop wise under the ice-cold condition. The reaction mixture was then stirred overnight at room temperature. Upon completion, the mixture was quenched with water (20 mL) and extracted with ethyl acetate thrice (3 x 30 mL). The organic layer was combined and dried over anhydrous Na2SO4. The final substrate (**H1**) was purified through column chromatography using silica gel (60-120 / 100-200 mesh size) and petroleum ether/ethyl acetate (90/10, v/v) as the eluent. Isolated compound turned white solid upon drying.

## All the synthesized silyl scaffolds were characterized by 1H and 13C NMR spectroscopy and characterization data were matched with previous reports.4

**2.7. Optimization details for non-directed olefination of simple arenes:**

*Yield and selectivity were determined by 1H NMR analysis of the crude product using TMB as the internal standard.*

**Table S1: Optimization by varying different palladium catalyst:**

| **Entry** | **Catalyst** | **NMR Yield (%)** | ***ß:ɑ*** |
| --- | --- | --- | --- |
| 1 | Pd(TFA)2 | n.d | - |
| 2 | Pd(CH3CN)2Cl2 | n.d | - |
| 3 | Pd(acac)2 | n.d | - |
| 4 | PdCl2 | n.d | - |
| 5 | Pd(PhCN)2Cl2 | n.d | - |
| 6 | Pd(COD)Cl2 | n.d | - |
| 7 | Pd(dba)Cl2 | n.d | - |
| 8 | Pd(OPiv)2 | trace | - |
| 9 | Pd(PPh3)2Cl2 | n.d | - |
| 10 | Pd(PPh3)4 | n.d | - |
| **11** | **Pd(OAc)2** | **41%** | **1:1** |

**Table S2: Optimization by varying different photocatalyst:**

| **Entry** | **Photocatalyst** | **NMR Yield (%)** | ***ß:ɑ*** |
| --- | --- | --- | --- |
| **1** | **Fluorescein** | **83** | **10:1** |
| 2 | Eosin Y | 41 | 1:1 |
| 3 | 4-Czipn | n.d. |  |
| 4 | 2,4,6 triphenyl pyrolidinium salt | 38 | 1:7 |
| 5 | Eosin B | 22 | 3:1 |
| 6 | 1,4 dicyanobenzene | trace | - |
| 7 | Rose Bengal | 45 | 1:1 |
| 8 | Rhodamin B | trace | - |
| 9 | Ru(bpy)3Cl2 | n.d. |  |
| 10 | Ir[dF(CF3)ppy]2(dtbpy))PF6 | 58 | 7:1 |

**Table S3: Optimization by varying different pyridone based ligands:**

| **Entry** | **Ligand** | **NMR Yield (%)** | ***ß:ɑ*** |
| --- | --- | --- | --- |
| 1 | 2-hydroxy-5-nitro pyridine | 83 | 10:1 |
| 2 | 4-benzyloxy-2-hydroxypyridine | 68 | 6:1 |
| 3 | 2-hydroxy-3-nitro-5-chloropyridine | 78 | 15:1 |
| **4** | **2-hydroxy-5-trifluoromethylpyridine** | **71** | **20:1** |
| 5 | 2-hydroxy-5-chloro pyridine | n.d. | - |
| 6 | 2-hydroxy-5-bromo pyridine | n.d. | - |
| 7 | 2-hydroxy-3,5,6-trifluoro pyridine | 69 | 4:1 |
| 8 | *N*-methyl 2-pyridone | 68 | 5:1 |
| 9 | 3-amino-2-pyridone | 10 | 2:1 |
| **10** | **2-hydroxy-3-nitro-5-methylpyridine** | **81** | **>25:1** |
| 11 | 3,5-dichloro-2-pyridone | 78 | 6:1 |
| 12 | 2-hydroxy-6-chloro pyridine | n.d. | - |
| 13 | 2-hydroxy-3-nitropyridine | 69 | 6:1 |
| 14 | 2-hydroxy-6-iodopyridine | n.d. | - |
| 15 | 2-hydroxy-3-cyano-4,6-dimethyl pyridine | 71 | 4:1 |
| 16 | 2,4-dihydroxy-6-methyl pyrimidine | n.d. | - |
| 17 | 2-hydroxy-4-methyl-5-nitropyridine | 78 | 4:1 |
| 18 | 2-hydroxy-pyridine | n.d. | - |
| 19 | 2-hydroxy-6-methyl pyridine | 79 | 2:1 |

**Table S4: Optimization by varying different pyridine-based ligands:**

| **Entry** | **Ligand** | **NMR Yield (%)** | ***ß:ɑ*** |
| --- | --- | --- | --- |
| 1 | 2,6-dichloro pyridine | 58 | 4:1 |
| 2 | 5-bromo-2-fluoropyridine | n.d. | - |
| 3 | 2-bromo-5-methylpyridine | 15 | 1:1 |
| 4 | 2-bromo-5-iodopyridine | n.d. | - |
| 5 | 4-acetylpyridine | 35 | 3:1 |
| 6 | 4-tert-butylpyridine | trace | - |
| 7 | pyridine | n.d. | - |
| 8 | 4-hydroxypyridine | 54 | 2:1 |
| 9 | 3-bromopyridine | trace | - |
| 10 | 2-chloro-5-iodopyridine | trace | - |
| 11 | 2-chloro-4-methylpyridine | 70 | 4:1 |
| 12 | pyrazine | 40 | 3:1 |
| 13 | 2-bromopyridine | 60 | 4:1 |
| 14 | 3-hydroxypyridine | 75 | 5:1 |
| 15 | 2-phenylpyridine | trace | - |
| 16 | 2-cyanopyridine | n.d. | - |
| 17 | 2,5-pyridine dicarboxylic acid | n.d. | - |
| 18 | 2-amino-3-methylpyridine | trace | - |
| 19 | 2-fluoropyridine | n.d. | - |
| 20 | 5-bromopyridine-2-carboxylic acid | n.d. | - |
| 21 | 2,5-dibromopyridine | 67 | 5:1 |
| 22 | 3-methylpyridine | 70 | 3:1 |
| **23** | **3-bromo-5-methoxypyridine** | **74** | **6:1** |
| 24 | 6-fluoropyridine-2-carboxylic acid | trace | - |

**Table S5: Optimization by varying quinoline based ligands:**

| **Entry** | **Ligand** | **NMR Yield (%)** | ***ß:ɑ*** |
| --- | --- | --- | --- |
| 1 | THQ | 40 | 1:1 |
| 2 | THIQ | 60 | 3:1 |
| 3 | 4,7-dichloroquinoline | trace | - |
| 4 | 8-bromoquinoline | 26 | 2:1 |
| 5 | 8-hydroxyquinoline | 23 | 3:1 |
| 6 | 6-aminoquinoline | trace | - |
| 7 | 8-nitroquinoline | n.d. | - |
| 8 | 2,2’-Biquinoline | trace | - |
| 9 | 3-hydroxyisoquinoline | 46 | 4:1 |
| 10 | 2-hydroxyquinoline | 23 | 2:1 |
| 11 | 6-methylquinoline | 20 | 1:1 |
| 12 | 2-chloroquinoline | 68 | 4:1 |
| 13 | 7-chloro-4-hydroxyquinoline | 46 | 7:1 |
| 14 | 3-bromoquinoline | 68 | 8:1 |
| **15** | **4-bromoisoquinoline** | **70** | **7:1** |
| 16 | 2-methyl-8-nitroquinoline | trace | - |
| 17 | 2-methyl-7-chloroquinoline | 76 | 6:1 |
| 18 | 2-methyl-6-methoxyquinoline | trace | - |
| 19 | 4-chloro-8-fluoroquinoline | n.d. | - |
| 20 | 5-bromoisoquinoline | trace | - |
| 21 | 5-bromoquinoline | n.d. | - |
| 22 | Benzo[h] quinoline | trace | - |
| 23 | quinoline | 16 | 2:1 |
| 24 | Isoquinoline | 18 | 1:1 |

**Table S6: Optimization by varying different solvents:**

| **Entry** | **Solvent** | **NMR Yield (%)** | ***ß:ɑ*** |
| --- | --- | --- | --- |
| **1** | **HFIP** | **81** | **>25:1** |
| 2 | DCE | - | ***-*** |
| 3 | DCM | - | ***-*** |
| 4 | TFE | - | ***-*** |
| 5 | 1,4 Dioxane | - | ***-*** |
| 6 | TBME | - | ***-*** |
| 7 | MeCN | - | ***-*** |
| 8 | THF | - | ***-*** |
| 9 | Toluene | - | ***-*** |
| 10 | TFA | 12 | 4:1 |
| 11 | 2-propanol | - | ***-*** |
| 12 | MeOH | - | ***-*** |

**Table S7:** **Optimization by varying amount of photocatalyst:**

| **Entry** | **Photocatalyst loading (mol%)** | **NMR Yield (%)** | ***ß:ɑ*** |
| --- | --- | --- | --- |
| 1 | 1 | 24 | 16:1 |
| 2 | 2 | 60 | 20:1 |
| **3** | **3** | **83** | **>25:1** |
| 4 | 4 | 81 | >25:1 |
| 5 | 5 | 81 | >25:1 |

**Table S8: Time optimization:**

| **Entry** | **Time (h)** | **NMR Yield (%)** | ***ß:ɑ*** |
| --- | --- | --- | --- |
| 1 | 4 h | 43 | >25:1 |
| 2 | 8 h | 57 | >25:1 |
| 3 | 12 h | 65 | >25:1 |
| 4 | 16 h | 68 | >25:1 |
| 5 | 20 h | 74 | >25:1 |
| 6 | 24 h | 83 | >25:1 |
| **7** | **28 h** | **88** | **>25:1** |
| 8 | 32 h | 80 | >25:1 |
| 9 | 36 h | 66 | 16:1 |

**2.8. Optimization details for *ortho*-C−H olefination of anilides:**

*Yield and selectivity were determined by 1H NMR analysis of the crude product using TMB as the internal standard.*

**Table S9:** **Optimization by varying different photocatalyst:**

| **Entry** | **Photocatalyst** | **NMR Yield (%)** |
| --- | --- | --- |
| **1** | **Fluorescein** | **73** |
| 2 | Eosin Y | 30 |
| 3 | 4-Czipn | 35 |
| 4 | 2,4,6 triphenyl pyrolidinium salt | 58 |
| 5 | Eosin B | trace |
| 6 | Rhodamine 6G | 20 |
| 7 | Rose Bengal | 30 |
| 8 | Rhodamin B | trace |
| 9 | Congo red 4B | trace |
| 10 | Ir[dF(CF3)ppy]2(dtbpy))PF6 | 25 |

**Table S10:** **Optimization by varying amount of photocatalyst:**

| **Entry** | **Photocatalyst loading (mol%)** | **NMR Yield (%)** |
| --- | --- | --- |
| 1. | 1 | 67 |
| 2. | 2 | 74 |
| **3.** | **3** | **82** |
| 4. | 4 | 80 |
| 5. | 5 | 73 |
| 6. | 6 | 70 |

**Table S11. Optimization by varying different amino acid ligands:**

| **Entry** | **Ligand** | **NMR Yield (%)** |
| --- | --- | --- |
| **1** | ***N*-Acetyl-Glycine** | **82** |
| 2 | *N*-Ac-DL-2-Phenyl Glycine | 55 |
| 3 | *N*-Ac-L-Leucine | 47 |
| 4 | *N*-Ac-DL-Norleucine | 45 |
| 5 | *N*-Ac-I-Valine | 35 |
| 6 | *N*-Ac-DL-Tryptophan | 13 |
| 7 | *N*-Ac-4-Hyrdoxy-L-proline | 15 |
| 8 | *N*-Ac-DL-Methionine | 11 |
| 9 | *N*-Ac-L-Histidine Monohydrate | 19 |
| 10 | *N*-Ac-Glycine Ethyl Ester | 29 |
| 11 | *N*-Ac-L-Glutamic Acid | 33 |
| 12 | *N*-Boc-L-Isoleucine | 10 |
| 13 | *N*-Boc-L-*tert*-Leucine | 23 |
| 14 | *N*-Boc-L-Tyrosine | 44 |
| 15 | *N*-Boc-D-Serine | 32 |
| 16 | *N*-Boc-L-Aspartic Acid | 56 |
| 17 | *N*-Boc-Glycine | 62 |
| 18 | *N*-Boc-4-Nitro Phenyl Glycine | 44 |
| 19 | Fmoc-Glycine | 60 |
| 20 | Glycyl Glycine | 58 |
| 21 | *N*-Formyl Glycine | 48 |

**Table S12:** **Optimization by varying different additives:**

| **Entry** | **Additives** | **NMR Yield (%)** |
| --- | --- | --- |
| 1 | PivOH | 55 |
| 2 | Adamantane-1-carboxylic acid | 26 |
| **3** | ***p*TSA** | **89** |
| 4 | NaOAc | 68 |
| 5 | Na2CO3 | 42 |
| 6 | HCO2Na | 48 |
| 7 | NaO*t*Bu | 75 |
| 8 | KOH | 60 |
| 9 | K3PO4 | 34 |
| 10 | NaH2PO4 | 22 |

**Table S13:** **Optimization by varying different palladium catalysts:**

| **Entry** | **Pd catalyst** | **NMR Yield (%)** |
| --- | --- | --- |
| 1 | PdCl2 | 60 |
| 2 | Pd(COD)Cl2 | 51 |
| **3** | **Pd(OAc)2** | **89** |
| 4 | PdCl2(PPh3)2 | 49 |
| 5 | Pd(acac)2 | 79 |
| 6 | Pd(CH3CN)2Cl2 | 64 |
| 7 | [Pd(*p*-cinnamyl)Cl]2 | 29 |
| 8 | Pd(OPiv)2 | 75 |
| 9 | Pd(dppf)Cl2 | 44 |
| 10 | Pd(PhCN)2Cl2 | 68 |
| 11 | Pd(TFA)2 | 53 |
| 12 | Pd2(dba)3 | 38 |

**Table S14:** **Optimization by varying amount of palladium catalysts:**

| **Entry** | **Catalyst loading (mol%)** | **NMR Yield (%)** |
| --- | --- | --- |
| **1** | **10** | **89** |
| 2 | 9 | 87 |
| 3 | 8 | 82 |
| 4 | 7 | 78 |
| 5 | 6 | 60 |
| 6 | 5 | 57 |

**Table S15:** **Optimization by varying different solvents:**

| **Entry** | **Solvent** | **NMR Yield (%)** |
| --- | --- | --- |
| 1 | HFIP | 89 |
| 2 | HFIP+DCE (8:2) | 34 |
| 3 | HFIP+DCE (9:1) | 32 |
| 4 | DCE | 10 |
| 5 | HFIP+AcOH (8:2) | 88 |
| **6** | **HFIP+AcOH(9:1)** | **92** |
| 7 | DCM | 11 |
| 8 | TFE | 8 |
| 9 | 1,4 Dioxane | - |
| 10 | TBME | - |
| 11 | MeCN | - |
| 12 | THF | - |
| 13 | Toluene | 78 |
| 14 | TFA | 30 |
| 15 | 2-propanol | 12 |
| 16 | HFIP+TFA (9:1) | 35 |
| 17 | MeOH | trace |
| 18 | AcOH | 45 |

**Table S16:** **Time** **optimization:**

| **Entry** | **Time** | **NMR Yield (%)** |
| --- | --- | --- |
| 1 | 12 | 68 |
| 2 | 16 | 76 |
| 3 | 20 | 85 |
| **4** | **24** | **92** |
| 5 | 28 | 89 |
| 6 | 32 | 87 |
| 7 | 36 | 83 |

**Table S17:** **Deviation from standard reaction condition:**

| **Entry** | **Variation from std condition** | **Yield (%)** |
| --- | --- | --- |
| 1. | none | 92 |
| 2. | No Pd catalyst | no product |
| 3. | No Photocatalyst | no product |
| 4. | Under dark condition | no product |
| 5. | No MPAA ligand | 20 |
| 6. | No acetic acid | 56 |

**2.9. Optimization details for *ortho*-C−H olefination of silanols:**

*Yield and selectivity were determined by 1H NMR analysis of the crude product using TMB as the internal standard.*

**Table S18:** **Optimization by varying different photocatalysts:**

| **Entry** | **Photocatalyst** | **NMR Yield (%)** |
| --- | --- | --- |
| 1 | Fluorescein | trace |
| **2** | **Eosin Y** | **65** |
| 3 | 4-Czipn | 15 |
| 4 | 2,4,6 triphenyl pyrolidinium salt | 10 |
| 5 | Eosin B | 50 |
| 6 | Rhodamine 6G | 5 |
| 7 | Rose Bengal | trace |
| 8 | Rhodamin B | trace |
| 9 | Congo red 4B | trace |
| 10 | Ir[dF(CF3)ppy]2(dtbpy))PF6 | 42 |

**Table S19:** **Optimization by varying different palladium catalysts:**

| **Entry** | **Pd catalyst** | **NMR Yield (%)** |
| --- | --- | --- |
| 1 | PdCl2 | 42 |
| 2 | Pd(COD)Cl2 | trace |
| **3** | **Pd(OAc)2** | **65** |
| 4 | PdCl2(PPh3)2 | Trace |
| 5 | Pd(acac)2 | - |
| 6 | Pd(CH3CN)2Cl2 | n.d. |
| 7 | [Pd(*p*-cinnamyl)Cl]2 | 16 |
| 8 | Pd(OPiv)2 | 25 |
| 9 | Pd(dppf)Cl2 | 38 |
| 10 | Pd(PhCN)2Cl2 | 10 |
| 11 | Pd(TFA)2 | 32 |
| 12 | Pd2(dba)3 | 6 |

**Table S20: Optimization by varying different amnio acid ligands:**

| **Entry** | **Ligand** | **NMR Yield (%)** |
| --- | --- | --- |
| **1** | ***N*-Acetyl-Glycine** | **65** |
| 2 | *N*-Ac-DL-2-Phenyl Glycine | 55 |
| 3 | *N*-Ac-L-Leucine | 47 |
| 4 | *N*-Ac-DL-Norleucine | 45 |
| 5 | *N*-Ac-I-Valine | 35 |
| 6 | *N*-Ac-DL-Tryptophan | 13 |
| 7 | *N*-Ac-4-Hyrdoxy-L-Proline | 15 |
| 8 | *N*-Ac-DL-Methionine | 11 |
| 9 | *N*-Ac-L-Histidine Monohydrate | 19 |
| 10 | *N*-Ac-Glycine Ethyl Ester | 29 |
| 11 | *N*-Ac-L-Glutamic Acid | 33 |
| 12 | *N*-Boc-L-Isoleucine | 10 |
| 13 | *N*-Boc-L-*tert*-leucine | 23 |
| 14 | *N*-Boc-L-Tyrosine | 44 |
| 15 | *N*-Boc-D-Serine | 32 |
| 16 | *N*-Boc-L-Aspartic Acid | 56 |
| 17 | *N*-Boc-Glycine | 62 |
| 18 | *N*-Boc-4-Nitro Phenyl Glycine | 44 |
| 19 | Fmoc-Glycine | 60 |
| 20 | Glycyl Glycine | 58 |
| 21 | *N*-Formyl Glycine | 48 |

**Table S21:** **Optimization by varying different bases:**

| **Entry** | **Metal salt/ Base** | **Yield %** |
| --- | --- | --- |
| 1 | KOAc | 41 |
| 2 | NaOAc | 45 |
| 3 | NaHCO3 | 15 |
| 4 | CF3CO2Na | 20 |
| 5 | Na2CO3 | 42 |
| 6 | HCO2Na | n.d |
| 7 | K2CO3 | 30 |
| 8 | KHCO3 | 15 |
| 9 | NaO*t*Bu | n.d |
| 10 | KO*t*Bu | n.d |
| 11 | LiO*t*Bu | n.d |
| **12** | **KH2PO4** | **65** |
| 13 | KOH | n.d |
| 14 | LiOH | n.d |
| 15 | Cs2CO3 | 15 |
| 16 | K3PO4 | n.d |
| 17 | NaOPiv | n.d |
| 18 | NaH2PO4 | 45 |

**Table S22:** **Optimization by varying amount of photocatalyst:**

| **Entry** | **Photocatalyst loading (mol%)** | **NMR Yield (%)** |
| --- | --- | --- |
| 1. | 1 | 62 |
| 2. | 2 | 65 |
| **3.** | **3** | **78** |
| 4. | 4 | 73 |
| 5. | 5 | 65 |
| 6. | 6 | 64 |

**Table S23:** **Optimization by varying different solvents:**

| **Entry** | **Solvent** | **NMR Yield (%)** |
| --- | --- | --- |
| **1** | **HFIP** | **78** |
| 2 | DCE | 24 |
| 3 | DCM | 13 |
| 4 | TFE | trace |
| 5 | 1,4 Dioxane | - |
| 6 | TBME | - |
| 7 | MeCN | - |
| 8 | THF | - |
| 9 | Toluene | trace |
| 10 | TFA | 32 |
| 11 | 2-propanol | trace |
| 12 | MeOH | - |
| 13 | AcOH | 18 |

**Table S24:** **Time** **optimization:**

| **Entry** | **Time** | **NMR Yield (%)** |
| --- | --- | --- |
| 1 | 12 | 54 |
| 2 | 16 | 58 |
| 3 | 20 | 61 |
| **4** | **24** | **78** |
| 5 | 28 | 76 |
| 6 | 32 | 75 |
| 7 | 36 | 75 |

**2.10. Optimization details for atropisomerism of biaryls:**

*Yield was determined by 1H NMR analysis of the crude product using TMB as the internal standard. The er value was determined by chiral HPLC.*

**Table S25: Optimization by varying different palladium salts:**

| **Entry** | **Pd Catalyst** | **NMR Yield (%)** | ***er*** |
| --- | --- | --- | --- |
| 1 | Pd(TFA)2 | 12 | 10:90 |
| 2 | Pd(CH3CN)2Cl2 | n.d | - |
| 3 | Pd(acac)2 | trace | - |
| 4 | PdCl2 | n.d | - |
| 5 | Pd(PhCN)2Cl2 | n.d | - |
| 6 | Pd(COD)Cl2 | n.d | - |
| 7 | Pd(dba)Cl2 | n.d | - |
| 8 | Pd(OPiv)2 | 16 | 15:85 |
| 9 | Pd(PPh3)2Cl2 | n.d | - |
| 10 | Pd(PPh3)4 | n.d | - |
| **11** | **Pd(OAc)2** | **34%** | **25:75** |

**Table S26: Optimization by varying different photocatalysts:**

| **Entry** | **Photocatalyst** | **NMR Yield (%)** | ***er*** |
| --- | --- | --- | --- |
| 1 | Fluorescein | 21 | 13:83 |
| 2 | Eosin Y | 23 | 15:85 |
| 3 | 2,4,6 triphenyl pyrolidinium salt | 8 | - |
| 4 | Eosin B | 25 | 10:90 |
| 5 | Rose Bengal | trace | - |
| 6 | Ru(bpy)3Cl2 | trace | - |
| **7** | **Ir[dF(CF3)ppy]2(dtbpy))PF6** | **34** | **25:75** |

**Table S27: Optimization by varying different amnio acid ligands:**

| **Entry** | **Ligand** | **NMR Yield (%)** | ***er*** |
| --- | --- | --- | --- |
| 1 | *N*-Ac-L-Gly | 34 | 25:75 |
| 2 | BOC*-*L-Phe | 15 | 21:79 |
| 3 | BOC*-*L-Tle | trace | - |
| 4 | *N*-Ac-L-Leu | 26 | 25:75 |
| 5 | BOC*-*L-Ala | 30 | 28:72 |
| 6 | Cbz-L-Ala | 29 | 13:83 |
| 7 | BOC*-*L-Phe-Gly | trace | - |
| 8 | *N*-CBz-Phe | trace | - |
| 9 | Fmoc-L-Ala | 17 | 30:70 |
| **10** | ***N*-Ac-L-Ala** | **47** | **54:46** |

**Table S28: Optimization by varying different solvents:**

| **Entry** | **Solvent** | **NMR Yield (%)** | ***er*** |
| --- | --- | --- | --- |
| 1 | HFIP | 47 | 54:46 |
| 2 | AcOH | 12 | 19:81 |
| 3 | HFIP+DCE (1:1) | n.d | - |
| 4 | Butanol | 5 | 0 |
| 5 | iPr-OH | 10 | 12:88 |
| **6** | **MeOH** | **52** | **96:4** |
| 7 | EtOH | 45 | 89:11 |
| 8 | THF | n.d. | - |
| 9 | TFA | 7 | 26:74 |
| 10 | MeOH+AcOH (1:1) | 30 | 46:54 |
| 11 | MeOH+TFA (8:2) | 32 | 53:47 |
| 12 | HFIP+MeOH (8:2) | 48 | 86:14 |
| 13 | TFE | 28 | 65:35 |

**Table S29:** **Optimization by varying amount of photocatalyst:**

| **Entry** | **Photocatalyst loading (mol%)** | **NMR Yield (%)** | ***er*** |
| --- | --- | --- | --- |
| 1. | 1 | 34 | 96:4 |
| 2. | 2 | 48 | 96:4 |
| **3.** | **3** | **55** | **96:4** |
| 4. | 4 | 53 | 96:4 |
| 5. | 5 | 52 | 96:4 |

**Table S30: Time optimization:**

| **Entry** | **Time (h)** | **NMR Yield (%)** | ***er*** |
| --- | --- | --- | --- |
| 1 | 4 | 16 | 96:4 |
| 2 | 8 | 35 | 96:4 |
| 3 | 12 | 55 | 96:4 |
| 4 | 16 | 60 | 96:4 |
| 5 | 20 | 67 | 96:4 |
| **6** | **24** | **70** | **96:4** |
| 7 | 28 | 69 | 96:4 |

**2.11. Optimization details for *meta*-C−H olefination of arenes:**

*Yield and selectivity were determined by 1H NMR analysis of the crude product using TMB as the internal standard.*

**Table S31: Evaluation of directing groups for *meta*-olefination of arenes:**

**Table S32: Optimization by varying different palladium salts:**

| **Entry** | **Pd Catalyst** | **NMR Yield (%)** | ***meta*:*others*** |
| --- | --- | --- | --- |
| 1 | Pd(TFA)2 | n.d | - |
| 2 | Pd(CH3CN)2Cl2 | n.d | - |
| 3 | Pd(acac)2 | n.d | - |
| 4 | PdCl2 | n.d | - |
| 5 | Pd(PhCN)2Cl2 | n.d | - |
| 6 | Pd(COD)Cl2 | n.d | - |
| 7 | Pd(dba)Cl2 | n.d | - |
| 8 | Pd(OPiv)2 | trace | - |
| 9 | Pd(PPh3)2Cl2 | n.d | - |
| 10 | Pd(PPh3)4 | n.d | - |
| **11** | **Pd(OAc)2** | **39%** | **13:1** |

**Table S33: Optimization by varying different photocatalyst:**

| **Entry** | **Photocatalyst** | **NMR Yield (%)** | ***meta*:*others*** |
| --- | --- | --- | --- |
| 1 | Fluorescein | 36 | 5:1 |
| **2** | **Eosin Y** | **68** | **15:1** |
| 3 | 4-Czipn | 35 | 10:1 |
| 4 | 2,4,6 triphenyl pyrolidinium salt | 46 | 8:1 |
| 5 | Eosin B | 25 | 4:1 |
| 6 | 1,4 dicyanobenzene | trace | - |
| 7 | Rose Bengal | 40 | 13:1 |
| 8 | Rhodamin B | trace | - |
| 9 | Ru(bpy)3Cl2 | 30 | 7:1 |
| 10 | Ir[dF(CF3)ppy]2(dtbpy))PF6 | 39 | 13:1 |

**Table S34: Optimization by varying different amnio acid ligands:**

| **Entry** | **Ligand** | **NMR Yield (%)** | ***meta*:*others*** |
| --- | --- | --- | --- |
| 1 | *N*-Ac-Gly-OH | 68 | 15:1 |
| 2 | *N*-Ac-L-Leucine | 55 | 7:1 |
| 3 | *N*-Ac-L-Valine | 48 | 10:1 |
| 4 | *N*-Ac-DL-2-Phenyl Glycine | 36 | 8:1 |
| 5 | *N*-Ac-Phe-OH | 25 | 4:1 |
| 6 | BOC-Gly-OH | 54 | 10:1 |
| 7 | Fmoc-Gly-OH | 40 | 13:1 |
| **8** | **CBz-Gly-OH** | **68** | **30:1** |
| 9 | *N*-Ac-DL-Tryptophan | 36 | 6:1 |
| 10 | *N*-Ac-4-Hyrdoxy-L-Proline | 45 | 3:1 |
| 11 | *N*-Ac-DL-Methionine | 11 | 10:1 |
| 12 | *N*-Ac-L-Histidine Monohydrate | 6 | 7:1 |
| 13 | *N*-Ac-Glycine Ethyl Ester | 58 | 16:1 |
| 14 | *N*-Ac-L-Glutamic Acid | 33 | 11:1 |

**Table S35: Optimization by varying different solvents:**

| **Entry** | **Solvent** | **NMR Yield (%)** | ***meta*:*others*** |
| --- | --- | --- | --- |
| **1** | **HFIP** | **68** | **>30:1** |
| 2 | DCE | n.d | - |
| 3 | HFIP+DCE (1:1) | n.d | - |
| 4 | CH3CN | n.d | - |
| 5 | iPr-OH | n.d | - |
| 6 | MeOH | n.d | - |
| 7 | 1,4 dioxane | n.d. | - |
| 8 | THF | n.d. | - |
| 9 | TFA | n.d. | - |
| 10 | HFIP+H2O (1:1) | n.d. | - |
| 11 | HFIP+TFA (8:2) | Multiple product | - |
| 12 | HFIP+AcOH (8:2) | Multiple product | - |
| 13 | TFE | 28 | 30:1 |

**Table S36: Optimization of amount of olefin:**

| **Entry** | **Olefin amount (equiv.)** | **NMR Yield (%)** | ***meta*:*others*** |
| --- | --- | --- | --- |
| 1 | 1 | 32 | 30:1 |
| 2 | 1.5 | 43 | 30:1 |
| **3** | **2** | **73** | **30:1** |
| 4 | 2.5 | 71 | 30:1 |
| 5 | 3 | 68 | 30:1 |
| 6 | 3.5 | 64 | 30:1 |
| 7 | 4 | 64 | 30:1 |

**Table S37:** **Optimization by varying amount of photocatalyst:**

| **Entry** | **Photocatalyst loading (mol%)** | **NMR Yield (%)** | ***meta*:*others*** |
| --- | --- | --- | --- |
| 1. | 1 | 53 | 30:1 |
| 2. | 2 | 60 | 30:1 |
| **3.** | **3** | **73** | **30:1** |
| 4. | 4 | 72 | 30:1 |
| 5. | 5 | 73 | 30:1 |
| 6. | 6 | 73 | 30:1 |

**Table S38: Time optimization:**

| **Entry** | **Time (h)** | **NMR Yield (%)** | ***meta*:*others*** |
| --- | --- | --- | --- |
| 1 | 4 | 32 | 30:1 |
| 2 | 8 | 43 | 30:1 |
| 3 | 12 | 56 | 30:1 |
| 4 | 16 | 65 | 30:1 |
| 5 | 20 | 73 | 30:1 |
| 6 | 24 | 75 | 30:1 |
| **7** | **28** | **78** | **30:1** |
| 8 | 32 | 77 | 30:1 |
| 9 | 36 | 77 | 30:1 |

**2.12. Optimization details for *para*-C−H olefination of arenes:**

*Yield and selectivity were determined by 1H NMR analysis of the crude product using TMB as the internal standard.*

**Table S39: Optimization by varying different palladium salts:**

**Table S40: Optimization by varying different palladium salts:**

| **Entry** | **Pd Catalyst** | **NMR Yield (%)** | ***para*:*others*** |
| --- | --- | --- | --- |
| **1** | **Pd(TFA)2** | **55** | **17:1** |
| 2 | Pd(CH3CN)2Cl2 | 25 | 2:1 |
| 3 | Pd(acac)2 | 36 | 4:1 |
| 4 | PdCl2 | trace | - |
| 5 | Pd(PhCN)2Cl2 | 32 | 2:1 |
| 6 | Pd(COD)Cl2 | 23 | 5:1 |
| 7 | Pd(dba)Cl2 | - | - |
| 8 | Pd(OAc)2 | 45 | 15:1 |
| 9 | Pd(PPh3)2Cl2 | 30 | 3:1 |
| 10 | Pd(PPh3)4 | 33 | Multiple products |
| 11 | Pd(OPiv)2 | 39 | 4:1 |

**Table S41: Optimization by varying different photocatalysts:**

| **Entry** | **Photocatalyst** | **NMR Yield (%)** | ***para*:*others*** |
| --- | --- | --- | --- |
| 1 | Fluorescein | 36 | 4:1 |
| 2 | Eosin Y | 21 | 10:1 |
| 3 | 4-Czipn | 66 | 11:1 |
| 4 | 2,4,6 triphenyl pyrolidinium salt | 63 | 10:1 |
| **5** | **Eosin B** | **71** | **20:1** |
| 6 | 1,4 dicyanobenzene | 32 | 2:1 |
| 7 | Rose Bengal | 41 | 3:1 |
| 8 | Rhodamin B | 71 | 13:1 |
| 9 | Ru(bpy)3Cl2 | trace | - |
| 10 | Ir[dF(CF3)ppy]2(dtbpy))PF6 | 55 | 17:1 |

**Table S42: Optimization by varying different ligands:**

| **Entry** | **Ligand** | **NMR Yield (%)** | ***para*:*others*** |
| --- | --- | --- | --- |
| 1 | Boc-Val-OH | trace | 8:1 |
| 2 | Ac-Val-OH | 12 | 13:1 |
| 3 | Boc-Phe-OH | 8 | 24:1 |
| 4 | N-Pthaloyl-Phe-OH | 20 | 20:1 |
| 5 | Boc-Leu-OH | trace | - |
| 6 | Boc-Pro-OH | trace | - |
| 7 | Ac-Leu-OH | 15 | 2:1 |
| 8 | Formyl-Gly-OH | n.d. | - |
| 9 | Fmoc-Val-OH | 55 | 17:1 |
| 10 | Fmoc-Phe-OH | 40 | 9:1 |
| **11** | ***N*-Ac-Phe-OH** | **76** | **30:1** |
| 12 | *N*-Ac-Gly | 71 | 20:1 |

**Table S43: Optimization by varying different solvents:**

| **Entry** | **Solvent** | **NMR Yield (%)** | ***para*:*others*** |
| --- | --- | --- | --- |
| **1** | **HFIP** | **76** | **30:1** |
| 2 | DCE | 35 | 30:1 |
| 3 | HFIP:DCE (1:1) | 45 | 30:1 |
| 4 | CH3CN | trace | - |
| 5 | *i*Pr-OH | 25 | 30:1 |
| 6 | MeOH | 28 | 30:1 |
| 7 | 1,4 dioxane | n.d. | - |
| 8 | THF | n.d. | - |
| 9 | TFA | n.d. | - |
| 10 | HFIP:H2O (1:1) | n.d. | - |
| 11 | HFIP:TFA (8:2) | Multiple product | - |
| 12 | HFIP:AcOH (8:2) | Multiple product | - |
| 13 | TFE | 35 | 30:1 |

**Table S44:** **Optimization by varying amount of photocatalyst:**

| **Entry** | **Photocatalyst loading (mol%)** | **NMR Yield (%)** | ***para*:*others*** |
| --- | --- | --- | --- |
| 1. | 1 | 59 | 30:1 |
| 2. | 2 | 67 | 30:1 |
| **3.** | **3** | **76** | **30:1** |
| 4. | 4 | 76 | 30:1 |
| 5. | 5 | 76 | 30:1 |
| 6. | 6 | 75 | 30:1 |

**Table S45: Time optimization:**

| **Entry** | **Time (h)** | **NMR Yield (%)** | ***meta*:*others*** |
| --- | --- | --- | --- |
| 1 | 12 | 48 | 30:1 |
| 2 | 16 | 61 | 30:1 |
| 3 | 20 | 76 | 30:1 |
| 4 | 24 | 78 | 30:1 |
| 5 | 28 | 79 | 30:1 |
| 6 | 32 | 80 | 30:1 |
| **7** | **36** | **82** | **30:1** |
| 8 | 40 | 79 | 30:1 |
| 9 | 44 | 77 | 30:1 |

**2.13. General procedure for non-directed olefination of simple arenes:**

In an oven-dried screw capped reaction tube was charged with magnetic stir-bar, corresponding arene (0.1 mmol), Pd(OAc)2 (10 mol%), ligand (20-30 mol%), fluorescein (3 mol%.), and olefin (0.2 mmol) in 1 mL of 1,1,1,3,3,3-hexafluoro-2-propanol (HFIP) were added. The reaction tube was capped and placed 3 cm away from four 23 W house hold CFL bulbs with stirring (1500 rpm) at room temperature for 28 h to 48 h. The temperature was maintained at approximately (30 oC) through cooling with a fan. Upon completion the mixture was diluted with ethyl acetate and filtered through a celite pad. The filtrate was evaporated under reduced pressure and the crude mixture was purified by column chromatography using silica (100-200 mesh size) and petroleum ether / ethyl acetate as the eluent. The selectivity was monitored using 1H NMR signal in presence of 1,3,5-trimethoxybenzene as internal standard. The regio-selectivity was determined from 1H NMR signals of olefin protons.

**2.14. General procedure for *ortho*-olefination of Acetanilides:**

1. **General procedure:** In an oven-dried screw capped reaction tube was charged with magnetic stir-bar, acetanilide (1 equiv., 0.1 mmol), Pd(OAc)2 (10 mol%), *N*-Ac-Gly (20 mol%), fluorescein (3 mol%.), *p*TSA (0.5 equiv., 0.05mmol) and olefin (3 equiv., 0.3 mmol) in 1 mL of 9:1 mixture of 1,1,1,3,3,3-hexafluoro-2-propanol (HFIP) and acetic acid were added. The reaction tube was capped and placed 3 cm away from four 23 W house hold CFL bulbs with stirring (1500 rpm) at room temperature for 24 h. The temperature was maintained at approximately (30 oC) through cooling with a fan. Upon completion the mixture was diluted with ethyl acetate and filtered through a celite pad. The filtrate was evaporation under reduced pressure and the crude mixture was purified by column chromatography using silica (100-200 mesh size) and petroleum ether / ethyl acetate as the eluent.

1. **General procedure:** In an oven-dried screw capped reaction tube was charged with magnetic stir-bar, *N*-pivlamide (1 equiv., 0.1 mmol), Pd(OAc)2 (10 mol%), 2,4,6 triphenyl pyrolidinium salt (3 mol%.), *p*TSA (0.5 equiv., 0.05mmol) and olefin (3equiv., 0.3 mmol) in 1 mL of 9:1 mixture of 1,1,1,3,3,3-hexafluoro-2-propanol (HFIP) and acetic acid were added. The reaction tube was capped and placed 3 cm away from four 23 W house hold CFL bulbs with stirring (1500 rpm) at room temperature for 24 h. The temperature was maintained at approximately (30 oC) through cooling with a fan. Upon completion the mixture was diluted with ethyl acetate and filtered through a celite pad. The filtrate was evaporation under reduced pressure and the crude mixture was purified by column chromatography using silica (100-200 mesh size) and petroleum ether / ethyl acetate as the eluent.

**2.15. General procedure for *ortho*-olefination of silanols:**

**General procedure:** In an oven-dried screw capped reaction tube was charged with magnetic stir-bar, benzyldiisopropylsilanol(0.1 mmol, 1 equiv.), Pd(OAc)2 (10 mol%), *N*-Ac-Gly (20 mol%), KH2PO4 (2 equiv.), eosin Y (3 mol%.) and olefin (0.2 mmol, 2 equiv.) in 1 mL of 1,1,1,3,3,3-hexafluoro-2-propanol (HFIP) were added. The reaction tube was capped and placed 3 cm away from four 23 W house hold CFL bulbs with stirring (1500 rpm) at room temperature for 24 h. The temperature was maintained at approximately (30 oC) through cooling with a fan. Upon completion the mixture was diluted with ethyl acetate and filtered through a celite pad. The filtrate was evaporation under reduced pressure and the crude mixture was purified by column chromatography using silica (100-200 mesh size) and petroleum ether / ethyl acetate as the eluent.

**2.16. General procedure for atropisomerism of biaryls**:

**General procedure:** In an oven-dried screw capped reaction tube was charged with magnetic stir-bar, biaryl substrate (1 equiv., 0.1 mmol), Pd(OAc)2 (10 mol%), Ir[dF(CF3)ppy]2(dtbpy))PF6 (3 mol%.), *N*-Ac-L-Ala (20 mol%) and olefin (3equiv., 0.3 mmol) in 1 mL of MeOH were added. The reaction tube was capped and placed 3 cm away from four 23 W house hold CFL bulbs with stirring (1500 rpm) at room temperature for 24 h. The temperature was maintained at approximately (30 oC) through cooling with a fan. Upon completion the mixture was diluted with ethyl acetate and filtered through a celite pad. The filtrate was evaporation under reduced pressure and the crude mixture was purified by column chromatography using silica (100-200 mesh size) and petroleum ether / ethyl acetate as the eluent. The *er* value was determined by chiral HPLC.

**2.17. General procedure for *meta*-olefination of sulphonic ester derivatives**:

**General procedure:** In an oven-dried screw capped reaction tube was charged with magnetic stir-bar, corresponding sulphonic ester (0.1 mmol), Pd(OAc)2 (10 mol%), CBz-Gly-OH (20 mol%), eosin Y (3 mol%), and olefin (0.2 mmol, 2 equiv.) in 1 mL of 1,1,1,3,3,3-hexafluoro-2-propanol (HFIP) were added. The reaction tube was capped and placed 3 cm away from four 23 W house hold CFL bulbs with stirring (1500 rpm) at room temperature for 28h. The temperature was maintained at approximately (30 oC) through cooling with a fan. Upon completion the mixture was diluted with ethyl acetate and filtered through a celite pad. The filtrate was evaporation under reduced pressure and the crude mixture was purified by column chromatography using silica (100-200 mesh size) and petroleum ether / ethyl acetate as the eluent. The selectivity was monitored using 1H NMR signal in presence of 1,3,5-trimethoxybenzene as internal standard. The regio-selectivity was determined from 1H NMR signals of olefin protons.

**2.17.1.** **General procedure for *meta*-olefination of benzyl silane derivatives**:

**General procedure:** In an oven-dried screw capped reaction tube was charged with magnetic stir-bar, corresponding benzyl silane(0.1 mmol), Pd(OAc)2 (10 mol%), *N*-Ac-Gly (20 mol%), eosin Y (3 mol%), and olefin (0.2 mmol, 2 equiv.) in 1 mL of 1,1,1,3,3,3-hexafluoro-2-propanol (HFIP) were added. The reaction tube was capped and placed 3 cm away from four 23 W house hold CFL bulbs with stirring (1500 rpm) at room temperature for 28 h. The temperature was maintained at approximately (30 oC) through cooling with a fan. Upon completion the mixture was diluted with ethyl acetate and filtered through a celite pad. The filtrate was evaporation under reduced pressure and the crude mixture was purified by column chromatography using silica (100-200 mesh size) and petroleum ether / ethyl acetate as the eluent. The selectivity was monitored using 1H NMR signal in presence of 1,3,5-trimethoxybenzene as internal standard. The regio-selectivity was determined from 1H NMR signals of olefin protons.

**2.17.2. General procedure for *meta*-olefination of phosphonate ester derivatives**:

**General procedure:** In an oven-dried screw capped reaction tube was charged with magnetic stir-bar, corresponding phosphonate ester (0.1 mmol), Pd(OAc)2 (10 mol%), Ac-Phe-OH (20 mol%), eosin Y (3 mol%), and olefin (0.2 mmol, 2 equiv.) in 1 mL of 1,1,1,3,3,3-hexafluoro-2-propanol (HFIP) were added. The reaction tube was capped and placed 3 cm away from four 23 W house hold CFL bulbs with stirring (1500 rpm) at room temperature for 28 h. The temperature was maintained at approximately (30 oC) through cooling with a fan. Upon completion the mixture was diluted with ethyl acetate and filtered through a celite pad. The filtrate was evaporation under reduced pressure and the crude mixture was purified by column chromatography using silica (100-200 mesh size) and petroleum ether/ ethyl acetate as the eluent. The selectivity was monitored using 1H NMR signal in presence of 1,3,5-trimethoxybenzene as internal standard. The regio-selectivity was determined from 1H NMR signals of olefin protons.

**2.17.3. General procedure for *meta*-olefination of biphenyl ester derivatives**:

**General procedure:** In an oven-dried screw capped reaction tube was charged with magnetic stir-bar, corresponding biphenyl ester(0.1 mmol), Pd(OAc)2 (10 mol%), Ac-Phe-OH (20 mol%), eosin Y (3 mol%), and olefin (0.2 mmol, 2 equiv.) in 1 mL of 1,1,1,3,3,3-hexafluoro-2-propanol (HFIP) were added. The reaction tube was capped and placed 3 cm away from four 23 W house hold CFL bulbs with stirring (1500 rpm) at room temperature for 28 h. The temperature was maintained at approximately (30 oC) through cooling with a fan. Upon completion the mixture was diluted with ethyl acetate and filtered through a celite pad. The filtrate was evaporation under reduced pressure and the crude mixture was purified by column chromatography using silica (100-200 mesh size) and petroleum ether / ethyl acetate as the eluent. The selectivity was monitored using 1H NMR signal in presence of 1,3,5-trimethoxybenzene as internal standard. The regio-selectivity was determined from 1H NMR signals of olefin protons.

**2.17.4. General procedure for *meta*-olefination of long chain carbonyl ether derivatives**:

**General procedure:** In an oven-dried screw capped reaction tube was charged with magnetic stir-bar, corresponding long chain substate(0.1 mmol), Pd(OAc)2 (10 mol%), *N*-Ac-Gly (20 mol%), eosin Y (3 mol%), and olefin (0.2 mmol, 2 equiv.) in 1 mL of 1,1,1,3,3,3-hexafluoro-2-propanol (HFIP) were added. The reaction tube was capped and placed 3 cm away from four 23 W house hold CFL bulbs with stirring (1500 rpm) at room temperature for 28 h. The temperature was maintained at approximately (30 oC) through cooling with a fan. Upon completion the mixture was diluted with ethyl acetate and filtered through a celite pad. The filtrate was evaporation under reduced pressure and the crude mixture was purified by column chromatography using silica (100-200 mesh size) and petroleum ether / ethyl acetate as the eluent. The selectivity was monitored using 1H NMR signal in presence of 1,3,5-trimethoxybenzene as internal standard. The regio-selectivity was determined from 1H NMR signals of olefin protons.

**2.18. General procedure for remote *para* C−H olefination of benzyl silane derivatives**:

**General procedure:** In an oven-dried screw capped reaction tube was charged with magnetic stir-bar, corresponding benzyl silane(0.1 mmol), Pd(OAc)2 (10 mol%), Ac-Phe-OH (20 mol%), eosin B (3 mol%), and olefin (0.2 mmol, 2 equiv.) in 1 mL of 1,1,1,3,3,3-hexafluoro-2-propanol (HFIP) were added. The reaction tube was capped and placed 3 cm away from four 23 W house hold CFL bulbs with stirring (1500 rpm) at room temperature for 36 h. The temperature was maintained at approximately (30 oC) through cooling with a fan. Upon completion the mixture was diluted with ethyl acetate and filtered through a celite pad. The filtrate was evaporation under reduced pressure and the crude mixture was purified by column chromatography using silica (100-200 mesh size) and petroleum ether/ ethyl acetate as the eluent. The selectivity was monitored using 1H NMR signal in presence of 1,3,5-trimethoxybenzene as internal standard. The regio-selectivity was determined from 1H NMR signals of olefin protons.

**2.19. Characterization data of non-directed olefinated products:**

**Ethyl (*E*)-3-(3,4-dimethylphenyl)acrylate (1):**

**Physical appearance:** Colorless oil.

**Column material:** 100-200 mesh silica

**Eluent**: petroleum ether/ethyl acetate (97/3, v/v).

**Yield:** 85%

**1H NMR (400 MHz, CDCl3)** δ 7.64 (d, *J* = 16.0 Hz, 1H), 7.30 (s, 1H), 7.29 – 7.26 (m, 1H), 7.14 (d, *J* = 7.8 Hz, 1H), 6.39 (d, *J* = 16.0 Hz, 1H), 4.25 (q, *J* = 7.1 Hz, 2H), 2.28 (s, 6H), 1.33 (dd, *J* = 9.1, 5.2 Hz, 3H).**13C NMR (101 MHz, CDCl3)** δ 167.51, 145.01, 139.61, 137.32, 132.34, 130.36, 129.48, 125.88, 117.18, 60.59, 20.02, 19.96, 14.55. **HRMS (ESI)**: Calculated mass for C13H17O2 [M+H]+: 205.1229; observed mass: 205.1228.

**Methyl (*E*)-3-(3,4-dimethylphenyl)acrylate (2)**5**:**

**Physical appearance:** Colorless oil.

**Column material:** 100-200 mesh silica

**Eluent**: petroleum ether/ethyl acetate (97/3, v/v).

**Yield:** 90%

**1H NMR (400 MHz, CDCl3)** δ 7.65 (d, *J* = 16.0 Hz, 1H), 7.32 – 7.25 (m, 2H), 7.14 (d, *J* = 7.8 Hz, 1H), 6.39 (d, *J* = 16.0 Hz, 1H), 3.80 (s, 3H), 2.28 (s, 6H). **13C NMR (101 MHz, CDCl3)** δ 167.92, 145.29, 139.70, 137.34, 132.26, 130.37, 129.50, 125.91, 116.70, 51.82, 20.02, 19.96.

**Butyl (*E*)-3-(3,4-dimethylphenyl)acrylate (3)**5**:**

**Physical appearance:** Colorless oil.

**Column material:** 100-200 mesh silica

**Eluent**: petroleum ether/ethyl acetate (98/2, v/v).

**Yield:** 95%

**1H NMR** **(400 MHz, CDCl3)** δ 7.63 (d, *J* = 16.0 Hz, 1H), 7.32 – 7.25 (m, 2H), 7.14 (d, *J* = 7.8 Hz, 1H), 6.39 (d, *J* = 16.0 Hz, 1H), 4.20 (t, *J* = 6.7 Hz, 2H), 2.28 (s, 6H), 1.73 – 1.64 (m, 2H), 1.49 – 1.39 (m, 2H), 0.96 (t, *J* = 7.4 Hz, 3H). **13C NMR** **(101 MHz, CDCl3)** δ 167.60, 144.96, 139.58, 137.31, 132.36, 130.35, 129.48, 125.88, 117.20, 64.52, 31.01, 20.01, 19.95, 19.43, 13.97.

**Benzyl (*E*)-3-(3,4-dimethylphenyl)acrylate (4)**5**:**

**Physical appearance:** Colorless oil.

**Column material:** 100-200 mesh silica

**Eluent**: petroleum ether/ethyl acetate (95/5, v/v).

**Yield:** 92%

**1H NMR** **(400 MHz, CDCl3)** δ 7.56 (d, *J* = 15.8 Hz, 1H), 7.31 – 7.12 (m, 7H), 7.01 (d, *J* = 7.6 Hz, 1H), 6.31 (d, *J* = 15.8 Hz, 1H), 5.12 (s, 2H), 2.15 (s, 6H). **13C NMR** **(101 MHz, CDCl3)** δ 167.27, 145.61, 139.77, 137.34, 136.38, 132.24, 130.38, 129.55, 128.79, 128.46, 128.41, 125.95, 116.76, 66.45, 20.02, 19.95.

**Cyclohexyl (*E*)-3-(3,4-dimethylphenyl)acrylate (5):**

**Physical appearance:** Sticky oil.

**Column material:** 100-200 mesh silica

**Eluent**: petroleum ether/ethyl acetate (93/7, v/v).

**Yield:** 93%

**1H NMR** **(500 MHz, CDCl3)** δ 7.62 (d, *J* = 16.0 Hz, 1H), 7.31 (s, 1H), 7.27 (d, *J* = 8.4 Hz, 1H), 7.14 (d, *J* = 7.7 Hz, 1H), 6.38 (d, *J* = 16.0 Hz, 1H), 4.92 – 4.84 (m, 1H), 2.27 (s, 6H), 1.96 – 1.88 (m, 2H), 1.77 (dd, *J* = 8.8, 3.8 Hz, 2H), 1.60 – 1.53 (m, 1H), 1.47 (ddd, *J* = 23.7, 16.3, 6.8 Hz, 4H), 1.29 (dd, *J* = 22.7, 10.4 Hz, 1H). **13C NMR** **(126 MHz, CDCl3)** δ 166.93, 144.66, 139.47, 137.27, 132.42, 130.33, 129.45, 125.85, 117.78, 72.78, 31.97, 25.65, 24.03, 20.01, 19.95. **HRMS (ESI)**: Calculated mass for C17H23O2 [M+H]+: 259.1698; observed mass: 259.1697.

**2,2,2-Trifluoroethyl (*E*)-3-(3,4-dimethylphenyl)acrylate (6):**

**Physical appearance:** Light green oil.

**Column material:** 100-200 mesh silica

**Eluent**: petroleum ether/ethyl acetate (92/8, v/v).

**Yield:** 90%

**1H NMR** **(400 MHz, CDCl3)** δ 7.74 (d, *J* = 16.0 Hz, 1H), 7.35 – 7.27 (m, 2H), 7.17 (d, *J* = 7.8 Hz, 1H), 6.44 (d, *J* = 16.0 Hz, 1H), 4.58 (q, *J* = 8.5 Hz, 2H), 2.29 (d, *J* = 2.1 Hz, 6H). **13C NMR** **(126 MHz, CDCl3)** δ 165.66, 147.62, 140.48, 137.52, 131.78, 130.49, 129.76, 126.24, 114.76, 60.98, 60.68, 60.39, 60.10, 20.09, 19.95.Calculated mass for C13H14F3O2 [M+H]+: 259.0946; observed mass: 259.0945.

**(*E*)-3-(3,4-Dimethylphenyl)acrylic acid (7):** 5

**Physical appearance:** Colorless oil.

**Column material:** 100-200 mesh silica

**Eluent**: petroleum ether/ethyl acetate (90/10, v/v).

**Yield:** 81%

**1H NMR** **(500 MHz, CDCl3)** δ 7.75 (d, *J* = 15.9 Hz, 1H), 7.35 – 7.27 (m, 2H), 7.17 (d, *J* = 7.7 Hz, 1H), 6.41 (d, *J* = 15.9 Hz, 1H), 2.29 (s, 6H). **13C NMR** **(126 MHz, CDCl3)** δ 172.56, 147.49, 140.26, 137.45, 131.96, 130.46, 129.78, 126.25, 116.14, 20.07, 19.95.

**(*E*)-1-(3,4-Dimethylphenyl)pent-1-en-3-one (8):**

**Physical appearance:** Colorless oil.

**Column material:** 100-200 mesh silica

**Eluent**: petroleum ether/ethyl acetate (94/6, v/v).

**Yield:** 86%

**1H NMR (400 MHz, CDCl3)** δ 7.52 (d, *J* = 16.2 Hz, 1H), 7.36 – 7.27 (m, 2H), 7.15 (d, *J* = 7.7 Hz, 1H), 6.70 (d, *J* = 16.2 Hz, 1H), 2.69 (q, *J* = 7.3 Hz, 2H), 2.28 (s, 6H), 1.16 (t, *J* = 7.3 Hz, 3H).**13C NMR** **(101 MHz, CDCl3)** δ 201.31, 142.70, 139.82, 137.40, 132.44, 130.43, 129.64, 126.09, 125.18, 34.12, 20.04, 19.96, 8.52.Calculated mass for C13H17O [M+H]+: 189.1279; observed mass: 189.1279.

**(*E*)-3-(3,4-Dimethylphenyl)acrylonitrile (9):**5

**Physical appearance:** Colorless oil.

**Column material:** 100-200 mesh silica

**Eluent**: petroleum ether/ethyl acetate (95/5, v/v).

**Yield:** 85%

**1H NMR** **(500 MHz, CDCl3)** δ 7.34 (d, *J* = 16.6 Hz, 1H), 7.23 – 7.15 (m, 3H), 5.81 (d, *J* = 16.6 Hz, 1H), 2.29 (d, *J* = 4.8 Hz, 6H). **13C NMR** **(126 MHz, CDCl3)** δ 150.95, 140.82, 137.68, 131.47, 130.55, 128.71, 125.17, 118.77, 94.99, 20.09, 19.94.

**Diethyl (*E*)-(3,4-dimethylstyryl)phosphonate (10):**5

**Physical appearance:** Yellowish oil.

**Column material:** 100-200 mesh silica

**Eluent**: petroleum ether/ethyl acetate (90/10, v/v).

**Yield:** 87%

**1H NMR** **(500 MHz, CDCl3)** δ 7.45 (dd, *J* = 22.5, 17.5 Hz, 1H), 7.27 (d, *J* = 6.3 Hz, 1H), 7.24 (d, *J* = 8.0 Hz, 1H), 7.14 (d, *J* = 7.7 Hz, 1H), 6.18 (t, *J* = 17.7 Hz, 1H), 4.25 – 4.01 (m, 4H), 2.27 (s, 6H), 1.34 (t, *J* = 7.0 Hz, 6H). **13C NMR** **(126 MHz, CDCl3)** δ 149.21, 139.59, 137.30, 132.84, 130.31, 129.08, 125.56, 113.21, 111.68, 62.01, 61.96, 19.99, 19.96, 16.64, 16.59.

**(*E*)-1,2-Dimethyl-4-(2-(methylsulfonyl)vinyl)benzene (11):**

**Physical appearance:** Colorless oil.

**Column material:** 100-200 mesh silica

**Eluent**: petroleum ether/ethyl acetate (95/5, v/v).

**Yield:** 71%

**1H NMR (500 MHz, CDCl3)** δ 7.57 (d, *J* = 15.4 Hz, 1H), 7.28 (s, 1H), 7.24 (s, 1H), 7.18 (d, *J* = 7.8 Hz, 1H), 6.85 (d, *J* = 15.4 Hz, 1H), 3.02 (s, 3H), 2.30 (s, 3H), 2.28 (s, 3H).**13C NMR (126 MHz, CDCl3)** δ 144.45, 141.03, 137.73, 130.61, 129.92, 129.90, 126.43, 124.92, 43.59, 20.09, 19.92.Calculated mass for C11H15O2S [M+H]+: 211.0793; observed mass: 211.0793.

**Methyl (*R*)-5-(3,4-dimethylphenyl)cyclopent-1-ene-1-carboxylate (12):**5

**Physical appearance:** Colorless oil.

**Column material:** 100-200 mesh silica

**Eluent**: petroleum ether/ethyl acetate (90/10, v/v).

**Yield:** 79%

**1H NMR** **(500 MHz, CDCl3)** δ 7.03 (d, *J* = 7.6 Hz, 1H), 6.97 (s, 1H), 6.93 (s, 1H), 6.89 (d, *J* = 7.7 Hz, 1H), 4.13 – 4.05 (m, 1H), 3.62 (s, 3H), 2.71 – 2.62 (m, 1H), 2.55 – 2.45 (m, 2H), 2.22 (d, *J* = 6.5 Hz, 6H), 1.92 – 1.85 (m, 1H). **13C NMR** **(126 MHz, CDCl3)** δ 165.53, 144.92, 142.74, 139.48, 136.68, 134.54, 129.90, 128.50, 124.45, 51.56, 49.83, 34.46, 32.38, 20.09, 19.59.

**Methyl cinnamate (13):**

**Physical appearance:** Colorless liquid.

**Column material:** 100-200 mesh silica

**Eluent**: petroleum ether/ethyl acetate (95/5, v/v).

**Yield:** 65%

**1H NMR (500 MHz, CDCl3)** δ 7.70 (d, *J* = 16.0 Hz, 1H), 7.52 (dd, *J* = 6.5, 2.9 Hz, 2H), 7.42 – 7.36 (m, 3H), 6.45 (d, *J* = 16.0 Hz, 1H), 3.81 (s, 3H).**13C NMR (126 MHz, CDCl3)** δ 167.63, 145.07, 134.55, 130.49, 129.08, 128.26, 117.96, 51.90.Calculated mass for C10H11O2 [M+H]+: 163.0759; observed mass: 163.0757.

**Ethyl (*E*)-3-(*p*-tolyl)acrylate (14):**5

**Physical appearance:** Colorless liquid.

**Column material:** 100-200 mesh silica

**Eluent**: petroleum ether/ethyl acetate (96/4, v/v).

**Yield:** 86%

**1H NMR (400 MHz, CDCl3)** δ 7.66 (d, *J* = 16.0 Hz, 1H), 7.42 (d, *J* = 7.6 Hz, 2H), 7.18 (d, *J* = 7.7 Hz, 2H), 6.39 (d, *J* = 16.0 Hz, 1H), 4.26 (q, *J* = 7.0 Hz, 2H), 2.36 (s, 3H), 1.33 (t, *J* = 7.0 Hz, 3H). **13C NMR (101 MHz, CDCl3)** δ 167.26, 144.67, 140.68, 131.80, 129.68, 128.12, 117.22, 60.46, 58.40, 21.51, 15.41, 14.41.

**Ethyl (*E*)-3-(4-methoxyphenyl)acrylate (15):**5

**Physical appearance:** Colorless liquid.

**Column material:** 100-200 mesh silica

**Eluent**: petroleum ether/ethyl acetate (95/5, v/v).

**Yield:** 65%

**1H NMR (400 MHz, CDCl3)** δ 7.63 (d, *J* = 15.9 Hz, 1H), 7.46 (d, *J* = 8.2 Hz, 2H), 6.88 (d, *J* = 8.3 Hz, 2H), 6.29 (d, *J* = 15.9 Hz, 1H), 4.31 – 4.17 (m, 2H), 3.81 (s, 3H), 1.46 – 1.20 (m, 3H). **13C NMR (101 MHz, CDCl3)** δ 167.37, 161.40, 144.30, 129.74, 127.20, 115.75, 114.35, 60.35, 58.38, 55.37, 15.38, 14.40.

**Ethyl (*E*)-3-(4-chlorophenyl)acrylate (16):**5

**Physical appearance:** Colorless liquid.

**Column material:** 100-200 mesh silica

**Eluent**: petroleum ether/ethyl acetate (97/3, v/v).

**Yield:** 73%

**1H NMR (400 MHz, CDCl3)** δ 7.61 (d, *J* = 16.0 Hz, 1H), 7.43 (d, *J* = 8.5 Hz, 2H), 7.33 (d, *J* = 8.5 Hz, 2H), 6.38 (d, *J* = 16.0 Hz, 1H), 4.25 (q, *J* = 7.1 Hz, 2H), 1.32 (t, *J* = 7.1 Hz, 3H). **13C NMR (101 MHz, CDCl3)** δ 166.87, 143.26, 136.26, 133.12, 129.35, 129.31, 119.03, 60.77, 14.46.

**Methyl (*E*)-3-(4-hydroxyphenyl)acrylate (17):**

**Physical appearance:** Yellowish liquid

**Column material:** 100-200 mesh silica

**Eluent**: petroleum ether/ethyl acetate (92/8, v/v)

**Yield:** 74%

**1H NMR (500 MHz, CDCl3)** δ 7.64 (d, *J* = 16.0 Hz, 1H), 7.42 (d, *J* = 8.6 Hz, 2H), 6.86 (d, *J* = 8.6 Hz, 2H), 6.30 (d, *J* = 16.0 Hz, 1H), 3.80 (s, 3H).**13C NMR (126 MHz, CDCl3)** δ 168.46, 158.26, 145.12, 130.23, 128.30, 127.19, 116.13, 115.17, 51.96. **HRMS (ESI)**: Calculated mass for C10H9O3Na [M+Na]+: 200.0449; observed mass: 200.0447.

**Methyl (*E*)-3-(3-nitrophenyl)acrylate (18):**

**Physical appearance:** Yellow solid.

**Column material:** 100-200 mesh silica

**Eluent**: petroleum ether/ethyl acetate (90:10)

**Yield:** 45%

**1H NMR (400 MHz, CDCl3)** δ 8.37 (s, 1H), 8.23 (dd, *J* = 8.2, 1.3 Hz, 1H), 7.82 (d, *J* = 7.7 Hz, 1H), 7.72 (d, *J* = 16.0 Hz, 1H), 7.59 (t, *J* = 8.0 Hz, 1H), 6.56 (d, *J* = 16.0 Hz, 1H), 3.83 (s, 3H).**13C NMR (101 MHz, CDCl3)** δ 166.78, 148.89, 142.18, 136.32, 133.84, 130.19, 124.77, 122.64, 121.19, 52.24. **HRMS (ESI)**: Calculated mass for C10H10NO4 [M+H]+: 208.0610; observed mass: 208.0609.

**Methyl (*E*)-3-(3-(trifluoromethyl)phenyl)acrylate (19):**

**Physical appearance:** Sticky oil.

**Column material:** 100-200 mesh silica

**Eluent**: petroleum ether/ethyl acetate (90:10)

**Melting point:**

**Yield:** 69%

**1H NMR (500 MHz, CDCl3)** δ 7.75 (s, 1H), 7.69 (dd, *J* = 11.8, 8.2 Hz, 2H), 7.62 (d, *J* = 7.8 Hz, 1H), 7.51 (t, *J* = 7.8 Hz, 1H), 6.49 (d, *J* = 16.1 Hz, 1H), 3.81 (s, 3H). **13C NMR (126 MHz, CDCl3)** δ 167.08, 143.22, 135.34, 131.75, 131.49, 131.24, 129.65, 126.87, 126.84, 125.04, 124.80, 124.77, 122.87, 119.94, 52.08. **HRMS (ESI)**: Calculated mass for C11H10F3O2 [M+H]+: 230.0555; observed mass: 230.0.0553.

**Ethyl (*E*)-3-(3-formylphenyl)acrylate (20):**5

**Physical appearance:** White solid.

**Column material:** 100-200 mesh silica

**Eluent**: petroleum ether/ethyl acetate (88:12)

**Yield:** 50%

**1H NMR (400 MHz, CDCl3)** δ 10.04 (s, 1H), 8.02 (s, 1H), 7.89 (d, *J* = 7.6 Hz, 1H), 7.79 – 7.73 (m, 2H), 7.57 (t, *J* = 7.7 Hz, 1H), 6.53 (d, *J* = 16.0 Hz, 1H), 4.28 (q, *J* = 7.1 Hz, 2H), 1.34 (t, *J* = 7.1 Hz, 3H). **13C NMR (101 MHz, CDCl3)** δ 191.86, 166.71, 143.04, 137.14, 135.71, 133.74, 131.21, 129.87, 129.04, 120.42, 60.96, 14.49.

**Ethyl (*E*)-3-(2-fluorophenyl)acrylate (21):**5

**Physical appearance:** Colorless oil.

**Column material:** 100-200 mesh silica

**Eluent**: petroleum ether/ethyl acetate (92:8)

**Yield:** 68%

**1H NMR (400 MHz, CDCl3)** δ 7.78 (d, *J* = 16.2 Hz, 1H), 7.49 (t, *J* = 7.5 Hz, 1H), 7.31 (dd, *J* = 14.0, 6.8 Hz, 1H), 7.12 (t, *J* = 7.6 Hz, 1H), 7.08 – 7.01 (m, 1H), 6.50 (d, *J* = 16.2 Hz, 1H), 4.24 (q, *J* = 7.1 Hz, 2H), 1.31 (t, *J* = 7.1 Hz, 3H). **13C NMR (101 MHz, CDCl3)** δ 166.89, 162.67, 160.15, 137.24, 137.21, 131.77, 131.69, 129.13, 129.10, 124.54, 124.51, 122.64, 122.53, 120.95, 120.89, 116.36, 116.14, 60.70, 14.38.

**Methyl (*E*)-5-(3-ethoxy-3-oxoprop-1-en-1-yl)-2-methylbenzoate (22):**

**Physical appearance:** White solid.

**Column material:** 100-200 mesh silica

**Eluent**: petroleum ether/ethyl acetate (90:10)

**Yield:** 57%

**1H NMR (400 MHz, CDCl3)** δ 8.05 (d, *J* = 1.5 Hz, 1H), 7.64 (d, *J* = 16.0 Hz, 1H), 7.51 (dd, *J* = 7.9, 1.7 Hz, 1H), 7.23 (d, *J* = 7.9 Hz, 1H), 6.42 (d, *J* = 16.0 Hz, 1H), 4.24 (q, *J* = 7.1 Hz, 2H), 3.88 (s, 3H), 2.59 (s, 3H), 1.31 (t, *J* = 7.1 Hz, 3H). **13C NMR (101 MHz, CDCl3)** δ 167.52, 166.97, 143.53, 142.61, 132.51, 132.36, 131.09, 130.47, 130.25, 118.66, 60.69, 52.14, 21.84, 14.45. **HRMS (ESI)**: Calculated mass for C14H17O4 [M+H]+: 235.0970; observed mass: 235.0969.

**Ethyl (*E*)-3-(benzo[d][1,3]dioxol-5-yl)acrylate (23):**5

**Physical appearance:** Sticky oil.

**Column material:** 100-200 mesh silica

**Eluent**: petroleum ether/ethyl acetate (88:12)

**Yield:** 62%

**1H NMR (400 MHz, CDCl3)** δ 7.57 (d, *J* = 15.9 Hz, 1H), 7.05 – 6.94 (m, 2H), 6.78 (d, *J* = 7.9 Hz, 1H), 6.24 (d, *J* = 15.9 Hz, 1H), 5.98 (s, 2H), 4.23 (q, *J* = 7.1 Hz, 2H), 1.31 (t, *J* = 7.1 Hz, 3H). **13C NMR (101 MHz, CDCl3)** δ 167.44, 149.71, 148.46, 144.51, 128.99, 124.55, 116.26, 108.66, 106.60, 101.70, 60.59, 14.47.

**Methyl (*E*)-2-(3-ethoxy-3-oxoprop-1-en-1-yl)-5-methylbenzoate (24):**

**Physical appearance:** Yellowish oil.

**Column material:** 100-200 mesh silica

**Eluent**: petroleum ether/ethyl acetate (90:10)

**Yield:** 66%

**1H NMR (400 MHz, CDCl3)** δ 8.37 (d, *J* = 15.9 Hz, 1H), 7.73 (s, 1H), 7.48 (d, *J* = 8.0 Hz, 1H), 7.30 (d, *J* = 7.9 Hz, 1H), 6.26 (d, *J* = 15.9 Hz, 1H), 4.24 (q, *J* = 7.1 Hz, 2H), 3.90 (s, 3H), 2.36 (s, 3H), 1.31 (t, *J* = 7.1 Hz, 3H). **13C NMR (101 MHz, CDCl3)** δ 167.50, 166.86, 143.56, 139.85, 133.50, 133.18, 131.38, 129.92, 127.86, 120.37, 60.61, 52.44, 21.26, 14.44. **HRMS (ESI)**: Calculated mass for C14H17O4 [M+H]+: 235.0970; observed mass: 235.0969.

**Ethyl (*E*)-3-(5-cyano-2-methylphenyl)acrylate (25):**

**Physical appearance:** Colorless oil.

**Column material:** 100-200 mesh silica

**Eluent**: petroleum ether/ethyl acetate (90:10)

**Yield:** 74%

**1H NMR (500 MHz, CDCl3)** δ 7.91 (d, *J* = 16.0 Hz, 1H), 7.57 (d, *J* = 7.9 Hz, 1H), 7.51 (s, 1H), 7.27 (d, *J* = 2.9 Hz, 1H), 6.58 (d, *J* = 16.0 Hz, 1H), 4.28 (q, *J* = 7.1 Hz, 2H), 2.44 (s, 3H), 1.34 (t, *J* = 7.1 Hz, 3H). **13C NMR (126 MHz, CDCl3)** δ 166.06, 144.10, 139.66, 137.36, 133.54, 131.12, 127.82, 122.96, 117.57, 109.88, 61.07, 21.98, 14.41. **HRMS (ESI)**: Calculated mass for C13H14NO2 [M+H]+: 216.1025; observed mass: 216.1021.

**Ethyl (*E*)-3-(naphthalen-2-yl)acrylate (26):**5

**Physical appearance:** White solid.

**Column material:** 100-200 mesh silica

**Eluent**: petroleum ether/ethyl acetate (93:7)

**Yield:** 78%

**1H NMR (500 MHz, CDCl3)** δ 7.93 (s, 1H), 7.87 (s, 1H), 7.84 (dd, *J* = 9.5, 5.4 Hz, 3H), 7.54 – 7.50 (m, 2H), 6.56 (d, *J* = 16.0 Hz, 1H), 4.30 (q, *J* = 7.1 Hz, 2H), 1.36 (t, *J* = 7.1 Hz, 4H).**13C NMR (126 MHz, CDCl3)** δ 167.30, 144.86, 134.40, 133.48, 132.16, 130.11, 128.88, 128.76, 127.98, 127.41, 126.91, 123.69, 118.62, 60.75, 14.56.

**1-(Methoxycarbonyl)-7-[(1E)-3-methoxy-3-oxo-1-propenyl]-ferrocene (27):**

**Physical appearance**: Red solid.

**Column material**:100-200 mesh silica

**Eluent**: petroleum ether/ethyl acetate (85:15)

**Yield**:81%

**1H NMR (500 MHz, CDCl3)** δ 7.42 (d, *J* = 15.8 Hz, 1H), 6.03 (d, *J* = 15.8 Hz, 1H), 4.79 (s, 2H), 4.50 (s, 2H), 4.39 (d, *J* = 25.3 Hz, 4H), 3.77 (s, 6H). **13C NMR (126 MHz, CDCl3)** δ 172.42, 166.87, 130.94, 128.40, 71.45, 71.25, 70.30, 69.91, 51.82, 51.74. **HRMS (ESI)**: Calculated mass for C16H17FeO4 [M+H]+: 329.0476; observed mass: 329.0474.

**Methyl (*E*)-3-(thiophen-3-yl)acrylate (28):**

**Physical appearance:** White solid.

**Column material:** 100-200 mesh silica

**Eluent**: petroleum ether/ethyl acetate (85:15)

**Yield:** 70%

**1H NMR (500 MHz, CDCl3)** δ 7.63 (d, *J* = 15.9 Hz, 1H), 7.43 (s, 1H), 7.27 (d, *J* = 4.9 Hz, 1H), 7.23 (d, *J* = 5.0 Hz, 1H), 6.22 (d, *J* = 15.9 Hz, 1H), 3.73 (s, 3H). **13C NMR (126 MHz, CDCl3)** δ 167.57, 138.28, 137.46, 128.20, 126.96, 125.10, 117.37, 51.58. **HRMS (ESI)**: Calculated mass for C8H9SO2 [M+H]+: 169.0323; observed mass: 169.0322.

**Methyl (*E*)-3-(furan-3-yl)acrylate (29):**

**Physical appearance:** Colorless Liquid.

**Column material:** 100-200 mesh silica

**Eluent**: petroleum ether/ethyl acetate (85:15)

**Yield:** 74%

**1H NMR (500 MHz, CDCl3)** δ 7.61 (s, 1H), 7.54 (d, *J* = 15.8 Hz, 1H), 7.39 (s, 1H), 6.55 (s, 1H), 6.12 (d, *J* = 15.8 Hz, 1H), 3.73 (s, 3H).**13C NMR (126 MHz, CDCl3)** δ 167.54, 144.69, 144.51, 134.96, 122.67, 117.58, 107.50, 51.67. **HRMS (ESI)**: Calculated mass for C8H9O3 [M+H]+: 153.0552; observed mass: 153.0550.

**Ethyl (*E*)-3-(5-formylfuran-2-yl)acrylate (30):**5

**Physical appearance:** Colorless Liquid.

**Column material:** 100-200 mesh silica

**Eluent**: petroleum ether/ethyl acetate (88:12)

**Yield:** 77%

**1H NMR (400 MHz, CDCl3)** δ 7.36 (d, *J* = 15.7 Hz, 1H), 6.54 (d, *J* = 3.4 Hz, 1H), 6.40 (s, 1H), 6.35 (d, *J* = 3.4 Hz, 1H), 6.26 (d, *J* = 15.7 Hz, 1H), 4.22 (q, *J* = 7.1 Hz, 2H), 1.63 – 0.92 (m, 3H). **13C NMR (101 MHz, CDCl3)** δ 167.23, 166.10, 157.06, 150.82, 139.28, 131.01, 127.40, 116.13, 115.75, 109.83, 68.07, 61.41, 60.66, 14.50, 14.27.

**Ethyl (*E*)-3-(5-acetylthiophen-2-yl)acrylate (31):**5

**Physical appearance:** Colorless Liquid.

**Column material:** 100-200 mesh silica

**Eluent**: petroleum ether/ethyl acetate (85:15)

**Yield:** 80%

**1H NMR (400 MHz, CDCl3)** δ 7.70 (d, *J* = 15.8 Hz, 1H), 7.59 (d, *J* = 3.9 Hz, 1H), 7.23 (d, *J* = 3.9 Hz, 1H), 6.37 (d, *J* = 15.8 Hz, 1H), 4.26 (q, *J* = 7.1 Hz, 2H), 2.55 (s, 3H), 1.32 (t, *J* = 7.1 Hz, 3H). **13C NMR (101 MHz, CDCl3)** δ 190.65, 166.36, 146.74, 145.63, 136.25, 132.91, 130.86, 120.74, 61.07, 26.95, 14.46.

**Methyl (*E*)-3-(4-bromothiophen-2-yl)acrylate (32):**

**Physical appearance:** Yellowish oil.

**Column material:** 100-200 mesh silica

**Eluent**: petroleum ether/ethyl acetate (86:14)

**Yield:** 55%

**1H NMR (400 MHz, CDCl3)** δ 7.66 (d, *J* = 15.8 Hz, 1H), 7.25 (s, 1H), 7.14 (s, 1H), 6.23 (d, *J* = 15.7 Hz, 1H), 3.78 (s, 3H). **13C NMR (126 MHz, CDCl3)** δ 166.61, 140.15, 135.73, 132.38, 125.25, 117.78, 110.90, 51.80. **HRMS (ESI):** Calculated mass for C8H8SO2Br [M+H]+: 246.9428; observed mass: 246.9427.

**Methyl (*E*)-3-(1H-imidazol-5-yl)acrylate (33):**

**Physical appearance:** Colorless Liquid.

**Column material:** 100-200 mesh silica

**Eluent**: petroleum ether/ethyl acetate (70:30)

**Yield:** 69%

**1H NMR (500 MHz, CDCl3)** δ 7.72 (s, 1H), 7.61 (d, *J* = 15.8 Hz, 1H), 7.30 (s, 1H), 6.44 (d, *J* = 15.8 Hz, 1H), 3.77 (s, 3H). **13C NMR (126 MHz, CDCl3)** δ 168.20, 137.33, 135.13, 115.80, 51.88. **HRMS (ESI):** Calculated mass for C7H7N2O2Na [M+Na]+: 174.0405; observed mass: 174.0402.

**Methyl (*E*)-3-(pyridin-3-yl)acrylate (34):**

**Physical appearance:** Colorless oil.

**Column material:** 100-200 mesh silica

**Eluent**: petroleum ether/ethyl acetate (85:15)

**Yield:** 70%

**1H NMR (400 MHz, CDCl3)** δ 8.69 (s, 1H), 8.55 (d, *J* = 4.7 Hz, 1H), 7.79 (dd, *J* = 7.9, 0.9 Hz, 1H), 7.63 (d, *J* = 16.2 Hz, 1H), 7.29 (d, *J* = 5.0 Hz, 1H), 6.46 (d, *J* = 16.1 Hz, 1H), 3.76 (s, 3H). **13C NMR (101 MHz, CDCl3)** δ 166.81, 151.06, 149.76, 141.20, 134.35, 130.23, 123.87, 120.1009, 52.00. **HRMS (ESI):** Calculated mass for C9H10NO2 [M+H]+: 164.0712; observed mass: 164.0711.

**Ethyl (*E*)-3-(pyridin-3-yl)acrylate (35):**6

**Physical appearance:** Colorless oil.

**Column material:** 100-200 mesh silica

**Eluent**: petroleum ether/ethyl acetate (85:15)

**Yield:** 72%

**1H NMR (400 MHz, CDCl3)** δ 8.50 (d, *J* = 60.9 Hz, 1H), 7.69 (d, *J* = 7.4 Hz, 1H), 7.50 (d, *J* = 16.1 Hz, 1H), 7.21 – 7.12 (m, 1H), 6.35 (d, *J* = 16.1 Hz, 1H), 4.17 – 4.04 (m, 2H), 1.17 (t, *J* = 6.7 Hz, 3H). **13C NMR (101 MHz, CDCl3)** 166.03, 150.58, 149.35, 140.56, 134.17, 130.10, 123.65, 120.36, 60.56, 14.09.

**Butyl (*E*)-3-(pyridin-3-yl)acrylate (36):**6

**Physical appearance:** Colorless oil.

**Column material:** 100-200 mesh silica

**Eluent**: petroleum ethe/ethyl acetate (86:14)

**Yield:** 66%

**1H NMR (400 MHz, CDCl3)** δ 8.61 (d, *J* = 4.6 Hz, 2H), 7.55 (d, *J* = 16.1 Hz, 1H), 7.34 (d, *J* = 5.1 Hz, 2H), 6.56 (d, *J* = 16.1 Hz, 1H), 4.18 (t, *J* = 6.7 Hz, 2H), 1.73 – 1.58 (m, 2H), 1.39 (dd, *J* = 15.0, 7.4 Hz, 2H), 0.92 (t, *J* = 7.4 Hz, 3H). **13C NMR (101 MHz, CDCl3)** δ 166.18, 150.49, 141.96, 141.63, 123.17, 121.97, 64.98, 30.77, 19.26, 13.82.

**Ethyl (*E*)-3-(pyrimidin-2-yl)acrylate (37):**

**Physical appearance:** Colorless Liquid.

**Column material:** 100-200 mesh silica

**Eluent**: petroleum ether/ethyl acetate (85:15)

**Yield:** 65%

**1H NMR (400 MHz, CDCl3)** δ 8.77 (d, *J* = 4.9 Hz, 2H), 7.69 (d, *J* = 15.7 Hz, 1H), 7.21 (dd, *J* = 15.7, 10.4 Hz, 2H), 4.29 (q, *J* = 7.1 Hz, 2H), 1.34 (t, *J* = 7.1 Hz, 3H). **13C NMR (101 MHz, CDCl3)** δ 166.45, 163.13, 157.46, 142.80, 127.91, 120.42, 61.09, 14.43. **HRMS (ESI)**: Calculated mass for C9H11N2O2 [M+H]+: 179.0821; observed mass: 179.0819.

**Ethyl (*E*)-3-(quinolin-3-yl)acrylate (38):**6

**Physical appearance:** Colorless Liquid.

**Column material:** 100-200 mesh silica

**Eluent**: petroleum ether/ethyl acetate (80:20)

**Yield:** 69%

**1H NMR (500 MHz, CDCl3)** δ 9.04 (d, *J* = 1.6 Hz, 1H), 8.17 (s, 1H), 8.06 (d, *J* = 8.4 Hz, 1H), 7.83 – 7.75 (m, 2H), 7.74 – 7.65 (m, 1H), 7.53 (dd, *J* = 11.1, 3.9 Hz, 1H), 6.61 (d, *J* = 16.1 Hz, 1H), 4.27 (q, *J* = 7.1 Hz, 2H), 1.33 (t, *J* = 7.1 Hz, 3H). **13C NMR (126 MHz, CDCl3)** δ 166.54, 149.28, 148.58, 141.21, 135.59, 130.71, 129.47, 128.44, 127.72, 127.54, 120.30, 60.92, 14.43.

**Methyl (*E*)-3-(1-methyl-1H-indol-3-yl)acrylate (39):**

**Physical appearance:** Light Yellow solid.

**Column material:** 100-200 mesh silica

**Eluent**: petroleum ether/ethyl acetate (80:20)

**Yield:** 72%

**1H NMR (500 MHz, CDCl3)** δ 7.89 (d, *J* = 5.2 Hz, 1H), 7.87 (d, *J* = 2.5 Hz, 1H), 7.33 – 7.22 (m, 3H), 7.16 (s, 1H), 6.43 (d, *J* = 15.9 Hz, 1H), 3.84 (s, 3H), 3.62 (s, 3H).**13C NMR (126 MHz, CDCl3)** δ 168.61, 138.23, 137.89, 133.33, 125.82, 122.77, 121.15, 120.26, 111.65, 109.91, 51.19, 32.80. **HRMS (ESI):** Calculated mass for C13H14NO2 [M+H]+: 216.1025; observed mass: 216.1021.

**Methyl (*E*)-3-(benzo[d]thiazol-2-yl)acrylate (40):**

**Physical appearance:** Colorless Liquid.

**Column material:** 100-200 mesh silica

**Eluent**: petroleum ether/ethyl acetate (70:30)

**Yield:** 60%

**1H NMR (400 MHz, CDCl3)** δ 8.07 (d, *J* = 8.2 Hz, 1H), 7.93 – 7.84 (m, 2H), 7.55 – 7.49 (m, 1H), 7.45 (dd, *J* = 11.0, 4.2 Hz, 1H), 6.81 (d, *J* = 15.9 Hz, 1H), 3.85 (s, 3H). **13C NMR (101 MHz, CDCl3)** δ 166.22, 163.56, 154.04, 137.16, 135.39, 127.02, 126.77, 125.80, 124.23, 121.97, 52.42. **HRMS (ESI):** Calculated mass for C11H10SNO2 [M+H]+: 220.0432; observed mass: 220.0431.

**Ethyl (*E*)-3-(9-methyl-9H-carbazol-3-yl)acrylate (41):**

**Physical appearance:** White solid.

**Column material:** 100-200 mesh silica

**Eluent**: petroleum ether/ethyl acetate (75:25)

**Yield:** 56%

**1H NMR (400 MHz, CDCl3)** δ 8.26 (s, 1H), 8.10 (d, *J* = 7.7 Hz, 1H), 7.91 (d, *J* = 15.9 Hz, 1H), 7.68 (d, *J* = 8.5 Hz, 1H), 7.51 (t, *J* = 7.6 Hz, 1H), 7.40 (dd, *J* = 12.5, 8.4 Hz, 2H), 7.29 (d, *J* = 7.3 Hz, 1H), 6.48 (d, *J* = 15.9 Hz, 1H), 4.29 (q, *J* = 7.1 Hz, 2H), 3.86 (s, 3H), 1.36 (t, *J* = 7.1 Hz, 3H).**13C NMR (101 MHz, CDCl3)** δ 167.83, 146.11, 142.41, 141.70, 126.53, 126.01, 125.79, 123.39, 122.88, 121.21, 120.66, 119.89, 115.17, 109.04, 77.43, 60.48, 14.63. **HRMS (ESI)**: Calculated mass for C18H18NO2 [M+H]+: 280.1338; observed mass: 280.1334.

**(8*R*,9*R*,10*S*,13*S*,14*R*,17*S*)-10,13-Dimethyl-17-((*S*)-6-methylheptan-2-yl)-2,3,4,7,8,9,10,11,12,13,14,15,16,17-tetradecahydro-1H-cyclopenta[a]phenanthren-3-yl (*E*)-3-(*p*-tolyl)acrylate (42):**

**Physical appearance:** White solid.

**Column material:** 100-200 mesh silica

**Eluent**: petroleum ether/ethyl acetate (85:15)

**Yield:** 72%

**1H NMR (400 MHz, CDCl3)** δ 7.64 (d, *J* = 16.0 Hz, 1H), 7.42 (d, *J* = 8.1 Hz, 2H), 7.19 (d, *J* = 8.0 Hz, 2H), 6.38 (d, *J* = 16.0 Hz, 1H), 5.40 (d, *J* = 4.7 Hz, 1H), 4.79 – 4.68 (m, 1H), 2.40 (d, *J* = 7.6 Hz, 1H), 2.37 (s, 4H), 2.05 – 1.87 (m, 4H), 1.86 – 1.63 (m, 2H), 1.57 (s, 3H), 1.54 – 1.34 (m, 6H), 1.32 – 1.16 (m, 4H), 1.16 – 1.07 (m, 4H), 1.05 (s, 4H), 1.02 – 0.95 (m, 2H), 0.92 (d, *J* = 6.5 Hz, 3H), 0.87 (dd, *J* = 6.6, 1.8 Hz, 6H), 0.68 (s, 3H).**13C NMR (101 MHz, CDCl3)** δ 166.83, 144.65, 140.77, 139.95, 132.01, 129.81, 128.25, 122.90, 117.81, 74.20, 56.91, 56.34, 50.26, 42.53, 39.96, 39.74, 38.46, 37.25, 36.85, 36.40, 36.02, 32.09, 28.45, 28.24, 28.12, 24.51, 24.04, 23.04, 22.78, 21.68, 21.26, 19.57, 18.93, 12.08. **HRMS (ESI)**: Calculated mass for C37H55O2 [M+H]+: 531.4202; observed mass: 531.4200.

**(*Z*)-3,7-Dimethylocta-2,6-dien-1-yl (*E*)-3-([1,1'-biphenyl]-4-yl)acrylate (43):**

**Physical appearance:** White solid.

**Column material:** 100-200 mesh silica

**Eluent**: petroleum ether/ethyl acetate (90:10)

**Yield:** 74%

**1H NMR (400 MHz, CDCl3)** δ 7.77 (d, *J* = 16.0 Hz, 1H), 7.64 – 7.57 (m, 6H), 7.46 (t, *J* = 7.5 Hz, 2H), 7.38 (t, *J* = 7.3 Hz, 1H), 6.51 (d, *J* = 16.0 Hz, 1H), 5.51 (t, *J* = 7.1 Hz, 1H), 5.18 (t, *J* = 6.7 Hz, 1H), 4.77 (d, *J* = 7.2 Hz, 2H), 2.23 – 2.13 (m, 4H), 1.84 (s, 3H), 1.74 (s, 3H), 1.67 (s, 3H). **13C NMR (101 MHz, CDCl3)** δ 167.02, 144.21, 142.97, 142.69, 140.15, 133.48, 132.20, 128.96, 128.61, 127.89, 127.54, 127.06, 123.72, 119.42, 118.13, 61.25, 32.30, 26.77, 25.82, 23.64, 17.77. **HRMS (ESI)**: Calculated mass for C25H29O2 [M+H]+: 361.2168; observed mass: 361.2166.

**1,3,3-Trimethylbicyclo[2.2.1]heptan-2-yl (*E*)-3-(3,4-dimethoxyphenyl)acrylate (44):**

**Physical appearance:** Colorless Liquid.

**Column material:** 100-200 mesh silica

**Eluent**: petroleum ether/ethyl acetate (80:20)

**Yield:** 85%

**1H NMR (500 MHz, CDCl3)** δ 7.54 (d, *J* = 15.9 Hz, 1H), 7.02 (d, *J* = 8.3 Hz, 1H), 6.99 (s, 1H), 6.77 (d, *J* = 8.3 Hz, 1H), 6.28 (d, *J* = 15.9 Hz, 1H), 4.42 (s, 1H), 3.83 (s, 3H), 3.80 (s, 3H), 1.79 (dd, *J* = 15.9, 10.4 Hz, 1H), 1.69 – 1.63 (m, 2H), 1.58 – 1.52 (m, 1H), 1.40 (td, *J* = 12.4, 6.5 Hz, 1H), 1.13 (d, *J* = 10.3 Hz, 1H), 1.07 (s, 3H), 1.01 (s, 3H), 0.83 (d, *J* = 56.2 Hz, 1H), 0.74 (s, 3H). **13C NMR (126 MHz, CDCl3)** δ 167.54, 150.94, 149.10, 144.21, 127.39, 122.60, 116.00, 110.88, 109.42, 85.98, 55.79, 55.75, 48.32, 48.30, 41.38, 39.60, 29.68, 26.69, 25.84, 20.14, 19.40. **HRMS (ESI)**: Calculated mass for C21H29O4 [M+H]+: 345.2066; observed mass: 345.2065.

**(*S*)-2,8-Dimethyl-2-((4*S*,8*S*)-4,8,12-trimethyltridecyl)chroman-6-yl (*E*)-3-(2-fluorophenyl)acrylate (45):**

**Physical appearance:** Red sticky liquid.

**Column material:** 100-200 mesh silica

**Eluent**: petroleum ether/ethyl acetate (70:30)

**Yield:** 78%

**1H NMR (400 MHz, CDCl3)** δ 7.97 (d, *J* = 16.2 Hz, 1H), 7.59 (td, *J* = 7.6, 1.4 Hz, 1H), 7.39 (ddd, *J* = 15.2, 5.3, 1.6 Hz, 1H), 7.19 (t, *J* = 7.3 Hz, 1H), 7.13 (dd, *J* = 10.0, 8.9 Hz, 1H), 6.79 – 6.69 (m, 3H), 2.76 (t, *J* = 6.9 Hz, 2H), 2.18 (s, 3H), 1.87 – 1.71 (m, 2H), 1.62 – 1.49 (m, 4H), 1.48 – 1.30 (m, 8H), 1.28 (s, 9H), 1.23 – 1.04 (m, 8H), 0.87 (t, *J* = 7.0 Hz, 13H).**13C NMR (101 MHz, CDCl3)** δ 166.12, 162.90, 160.37, 150.01, 142.66, 138.80, 132.18, 132.09, 129.44, 129.42, 127.51, 124.71, 124.68, 122.65, 122.54, 121.33, 121.15, 120.52, 120.45, 119.27, 116.56, 116.35, 76.33, 40.33, 39.56, 37.64, 37.62, 37.48, 32.99, 32.89, 31.17, 28.17, 25.01, 24.65, 24.44, 22.93, 22.83, 22.67, 21.16, 19.95, 19.86, 16.37, 14.32. **HRMS (ESI)**: Calculated mass for C36H52FO3 [M+H]+: 551.3900; observed mass: 551.3899.

**(*Z*)-Octadec-9-en-1-yl (*E*)-3-(4-methoxyphenyl)acrylate (46):**

**Physical appearance:** Colorless Liquid.

**Column material:** 100-200 mesh silica

**Eluent**: petroleum ether/ethyl acetate (90:10)

**Yield: 6**9%

**1H NMR (500 MHz, CDCl3)** δ 7.62 (d, *J* = 15.9 Hz, 1H), 7.49 – 7.35 (m, 2H), 6.94 – 6.78 (m, 2H), 6.29 (dd, *J* = 16.0, 1.2 Hz, 1H), 5.34 (t, *J* = 4.6 Hz, 2H), 4.17 (t, *J* = 6.6 Hz, 2H), 3.79 (d, *J* = 2.3 Hz, 3H), 2.01 (d, *J* = 4.5 Hz, 3H), 1.75 – 1.54 (m, 2H), 1.33 (dd, *J* = 46.8, 15.6 Hz, 23H), 0.87 (t, *J* = 6.7 Hz, 3H).**13C NMR (126 MHz, CDCl3)** δ 167.39, 161.40, 144.25, 130.01, 129.85, 129.73, 127.27, 115.80, 114.34, 64.56, 55.31, 32.02, 29.87, 29.84, 29.65, 29.55, 29.45, 29.43, 29.40, 29.32, 28.88, 27.31, 27.28, 26.10, 22.79, 14.21. **HRMS (ESI)**: Calculated mass for C28H45O3 [M+H]+: 429.3369; observed mass: 429.3368.

**2-Methoxy-4-((*E*)-3-oxo-3-(((2a*S*,3*S*,5a*R*,5b*R*,7a*S*,9*R*,11a*S*,12a*R*)-2a,5a,8,8-tetramethyl-3-((*S*)-6-methylhept-5-en-2-yl)tetradecahydro-1H,12H-cyclopenta[a]cyclopropa[e]phenanthren-9-yl)oxy)prop-1-en-1-yl)phenyl (*E*)-3-(4-hydroxy-3-methoxyphenyl)acrylate (47):**

**Physical appearance:** Brownish oil.

**Column material:** 100-200 mesh silica

**Eluent**: petroleum ether/ethyl acetate (70:30)

**Yield:** 82%

**1H NMR (400 MHz, CDCl3)** δ 7.59 (d, *J* = 15.9 Hz, 2H), 7.12 – 7.01 (m, 4H), 6.91 (d, *J* = 8.1 Hz, 2H), 6.29 (dd, *J* = 15.9, 9.4 Hz, 2H), 5.85 (s, 1H), 3.93 (d, *J* = 5.9 Hz, 6H), 2.40 (d, *J* = 7.1 Hz, 1H), 2.24 (dt, *J* = 13.6, 6.8 Hz, 1H), 2.05 – 1.97 (m, 2H), 1.88 (ddd, *J* = 16.7, 11.8, 6.8 Hz, 4H), 1.68 (s, 2H), 1.61 (s, 2H), 1.58 (s, 3H), 1.46 (d, *J* = 4.6 Hz, 1H), 1.05 – 1.03 (m, 4H), 1.02 (d, *J* = 2.3 Hz, 2H), 0.97 (s, 6H), 0.91 (s, 3H), 0.91 (s, 2H), 0.89 (s, 6H), 0.84 (dd, *J* = 12.0, 4.5 Hz, 4H), 0.81 – 0.76 (m, 3H), 0.68 (s, 1H), 0.60 (d, *J* = 4.0 Hz, 1H), 0.37 (d, *J* = 4.1 Hz, 1H). **13C NMR (126 MHz, CDCl3)** δ 167.30, 157.09, 148.03, 146.97, 144.72, 144.53, 139.90, 127.34, 125.46, 123.23, 122.89, 116.49, 114.90, 109.48, 106.14, 80.74, 74.13, 56.15, 52.44, 50.24, 49.02, 48.06, 47.41, 45.50, 39.91, 38.48, 37.24, 36.83, 36.32, 36.09, 35.73, 35.18, 34.00, 33.07, 32.08, 31.84, 31.52, 29.99, 28.35, 28.13, 27.15, 26.71, 26.19, 26.03, 25.93, 25.69, 22.21, 22.07, 21.15, 20.35, 19.55, 19.51, 18.51, 18.19, 15.55, 12.06. **HRMS (ESI)**: Calculated mass for C50H65KO7 [M+H]+: 816.4367; observed mass: 816.4365.

**(8*R*,9*S*,10*S*,13*S*,14*S*,17*S*)-17-Acetyl-10,13-dimethylhexadecahydro-1H-cyclopenta[a]phenanthren-3-yl (*E*)-3-(3,4,5-trimethoxyphenyl)acrylate (48):**

**Physical appearance:** Colorless liquid.

**Column material:** 100-200 mesh silica

**Eluent**: petroleum ether/ethyl acetate (80:20)

**Yield:** 82%

**1H NMR (400 MHz, CDCl3)** δ 7.58 (d, *J* = 15.9 Hz, 1H), 6.75 (s, 2H), 6.33 (d, *J* = 15.9 Hz, 1H), 5.40 (d, *J* = 4.9 Hz, 1H), 4.79 – 4.70 (m, 1H), 3.88 (d, *J* = 2.1 Hz, 9H), 2.54 (t, *J* = 8.9 Hz, 1H), 2.43 – 2.37 (m, 2H), 2.22 – 2.15 (m, 1H), 2.12 (s, 3H), 2.07 – 2.03 (m, 1H), 1.99 – 1.87 (m, 3H), 1.74 – 1.55 (m, 6H), 1.54 – 1.44 (m, 3H), 1.22 (ddt, *J* = 28.9, 16.2, 14.4 Hz, 4H), 1.04 (s, 4H), 0.63 (s, 3H).**13C NMR (101 MHz, CDCl3)** δ 166.55, 153.61, 144.69, 139.83, 130.19, 122.66, 118.05, 105.33, 74.14, 63.88, 61.18, 57.03, 56.33, 50.09, 44.19, 38.99, 38.39, 37.23, 36.84, 32.02, 31.77, 28.07, 24.69, 23.02, 21.24, 19.54, 13.44. **HRMS (ESI)**: Calculated mass for C33H47O6 [M+H]+: 539.3373; observed mass: 539.3370.

**(9*R*,10*S*,13*S*,14*S*,17*S*)-17-((2S,5S,*E*)-5,6-Dimethylhept-3-en-2-yl)-10,13-dimethyl-2,3,4,9,10,11,12,13,14,15,16,17-dodecahydro-1H-cyclopenta[a]phenanthren-3-yl (*E*)-3-(benzo[d][1,3]dioxol-5-yl)acrylate (49):**

**Physical appearance:** Light green solid.

**Column material:** 100-200 mesh silica

**Eluent**: petroleum ether/ethyl acetate (88:12)

**Yield:** 69%

**1H NMR (400 MHz, CDCl3)** δ 7.58 (d, *J* = 15.9 Hz, 1H), 7.03 (d, *J* = 1.4 Hz, 1H), 7.00 (dd, *J* = 8.1, 1.4 Hz, 1H), 6.81 (d, *J* = 8.0 Hz, 1H), 6.25 (d, *J* = 15.9 Hz, 1H), 6.00 (s, 2H), 5.59 (dd, *J* = 5.5, 2.1 Hz, 1H), 5.41 – 5.37 (m, 1H), 5.20 (t, *J* = 7.3 Hz, 2H), 4.83 (ddd, *J* = 16.0, 11.4, 4.6 Hz, 1H), 2.57 (ddd, *J* = 14.4, 4.8, 2.1 Hz, 1H), 2.48 – 2.39 (m, 1H), 2.07 – 1.98 (m, 4H), 1.89 (ddd, *J* = 19.5, 9.9, 5.0 Hz, 4H), 1.78 – 1.66 (m, 4H), 1.52 – 1.42 (m, 2H), 1.42 – 1.34 (m, 2H), 1.34 – 1.22 (m, 2H), 1.04 (d, *J* = 6.6 Hz, 3H), 0.98 (s, 3H), 0.92 (d, *J* = 6.8 Hz, 3H), 0.83 (t, *J* = 6.4 Hz, 6H), 0.63 (s, 3H).**13C NMR (101 MHz, CDCl3)** δ 166.80, 149.74, 148.53, 144.43, 141.75, 138.85, 135.79, 132.18, 129.15, 124.59, 120.43, 116.76, 116.53, 108.75, 106.69, 101.74, 73.00, 55.91, 54.74, 46.26, 43.03, 40.66, 39.24, 38.17, 37.34, 37.00, 33.30, 28.51, 28.45, 23.21, 21.32, 21.24, 20.17, 19.86, 17.82, 16.42, 12.28. **HRMS (ESI)**: Calculated mass for C38H51O4 [M+H]+: 571.3787; observed mass: 571.3784.

**(8*S*,9*R*,13*R*,14*R*)-13-Methyl-17-oxo-7,8,9,11,12,13,14,15,16,17-decahydro-6H-cyclopenta[a]phenanthren-3-yl (*E*)-3-(thiophen-3-yl)acrylate (50):**

**Physical appearance:** Light yellow solid.

**Column material:** 100-200 mesh silica

**Eluent**: petroleum ether/ethyl acetate (90:10)

**Yield:** 73%

**1H NMR (400 MHz, CDCl3)** δ 7.84 (d, *J* = 15.9 Hz, 1H), 7.57 (d, *J* = 1.4 Hz, 1H), 7.37 (qd, *J* = 5.1, 2.1 Hz, 2H), 7.31 (d, *J* = 8.4 Hz, 1H), 6.93 (dd, *J* = 8.4, 2.5 Hz, 1H), 6.89 (d, *J* = 2.3 Hz, 1H), 6.44 (d, *J* = 15.9 Hz, 1H), 2.96 – 2.89 (m, 2H), 2.51 (dd, *J* = 18.8, 8.5 Hz, 1H), 2.13 (ddd, *J* = 16.0, 14.5, 7.3 Hz, 1H), 2.04 (t, *J* = 3.7 Hz, 2H), 1.98 (ddd, *J* = 12.4, 5.2, 2.8 Hz, 2H), 1.67 – 1.60 (m, 2H), 1.57 (dd, *J* = 10.7, 4.4 Hz, 3H), 1.53 – 1.45 (m, 2H), 0.92 (s, 3H).**13C NMR (101 MHz, CDCl3)** δ 221.09, 166.19, 148.87, 140.04, 138.22, 137.61, 137.53, 129.06, 127.40, 126.63, 125.37, 121.86, 119.03, 117.18, 50.64, 48.17, 44.38, 38.21, 36.08, 31.76, 29.63, 26.57, 25.97, 21.80, 14.05. **HRMS (ESI)**: Calculated mass for C25H27O3S [M+H]+: 407.1681; observed mass: 407.1680.

**(*E*)-3,7-Dimethylocta-2,6-dien-1-yl (*E*)-3-(furan-3-yl)acrylate (51):**

**Physical appearance:** Colorless Liquid.

**Column material:** 100-200 mesh silica

**Eluent**: petroleum ether/ethyl acetate (85:15)

**Yield:** 67%

**1H NMR (500 MHz, CDCl3)** δ 7.60 (s, 1H), 7.55 (d, *J* = 15.8 Hz, 1H), 7.38 (s, 1H), 6.55 (s, 1H), 6.14 (d, *J* = 15.8 Hz, 1H), 5.41 – 5.34 (m, 1H), 5.07 (d, *J* = 0.8 Hz, 1H), 4.68 (d, *J* = 6.8 Hz, 2H), 2.08 (s, 2H), 2.04 (d, *J* = 5.6 Hz, 2H), 1.70 (s, 3H), 1.65 (s, 3H), 1.57 (s, 3H).**13C NMR (101 MHz, CDCl3)** δ 167.02, 144.55, 144.45, 142.34, 134.67, 131.86, 123.88, 122.75, 118.50, 118.07, 107.51, 61.40, 39.64, 26.39, 25.76, 17.76, 16.57. **HRMS (ESI)**: Calculated mass for C17H23O3 [M+H]+: 275.1647; observed mass: 275.1643.

**3,7-Dimethyloct-6-en-1-yl (*E*)-3-(pyridin-3-yl)acrylate (52):**

**Physical appearance:** Colorless Liquid.

**Column material:** 100-200 mesh silica

**Eluent**: petroleum ether/ethyl acetate (90:10)

**Yield:** 71%

**1H NMR (500 MHz, CDCl3)** δ 8.64 (d, *J* = 2.0 Hz, 1H), 8.48 (d, *J* = 4.7 Hz, 1H), 7.72 (s, 1H), 7.59 – 7.50 (m, 1H), 7.21 (d, *J* = 4.1 Hz, 1H), 6.45 – 6.34 (m, 1H), 4.98 (d, *J* = 4.1 Hz, 1H), 4.21 – 4.07 (m, 2H), 1.97 – 1.80 (m, 2H), 1.69 – 1.59 (m, 1H), 1.55 (d, *J* = 8.9 Hz, 3H), 1.51 – 1.45 (m, 4H), 1.42 (dd, *J* = 11.3, 6.6 Hz, 1H), 1.31 – 1.22 (m, 1H), 1.10 (dd, *J* = 7.6, 4.7 Hz, 1H), 0.88 – 0.79 (m, 3H). **13C NMR (126 MHz, CDCl3)** δ 166.21, 150.86, 149.65, 140.73, 134.09, 131.17, 130.17, 124.52, 123.64, 120.45, 63.25, 36.92, 35.44, 29.45, 25.66, 25.33, 19.39, 17.59. **HRMS (ESI)**: Calculated mass for C18H26NO2 [M+H]+: 288.1964; observed mass: 288.1963.

**2.20. Characterization data of *ortho*-C−H olefinated products of anilides:**

**Ethyl (*E*)-3-(2-acetamidophenyl)acrylate (53):**

**Physical appearance:** Yellow crystalline solid.

**Column material:** 100-200 mesh silica

**Eluent**: petroleum ether/ethyl acetate (78/22, v/v).

**Yield:** 95%

**1H NMR (500 MHz, CDCl3)** δ 7.81 (d, *J* = 15.8 Hz, 1H), 7.71 (d, *J* = 7.9 Hz, 1H), 7.60 (s, 1H), 7.54 (d, *J* = 7.6 Hz, 1H), 7.36 (t, *J* = 7.3 Hz, 1H), 7.18 (t, *J* = 7.3 Hz, 1H), 6.38 (d, *J* = 15.8 Hz, 1H), 4.25 (q, *J* = 7.1 Hz, 2H), 2.21 (s, 3H), 1.32 (t, *J* = 7.1 Hz, 3H). **13C NMR (126 MHz, CDCl3)** δ 169.31, 167.12, 139.57, 136.06, 130.97, 129.12, 127.23, 126.10, 125.54, 120.67, 60.96, 24.30, 14.46. **HRMS (ESI)**: Calculated mass for C13H14NO3Na [M+Na]+: 255.0871.; observed mass: 255.0870.

**Dodecyl (*E*)-3-(2-acetamidophenyl)acrylate (54):**

**Physical appearance:** White crystalline solid

**Column material:** 100-200 mesh silica

**Eluent**: petroleum ether/ethyl acetate (80/20, v/v).

**Yield:** 89%

**1H NMR (500 MHz, CDCl3)** δ 7.81 (d, *J* = 15.8 Hz, 1H), 7.76 (d, *J* = 8.1 Hz, 1H), 7.56 (d, *J* = 7.7 Hz, 1H), 7.38 (dd, *J* = 15.1, 7.1 Hz, 2H), 7.20 (t, *J* = 7.5 Hz, 1H), 6.40 (d, *J* = 15.8 Hz, 1H), 4.19 (t, *J* = 6.8 Hz, 2H), 2.24 (s, 3H), 1.72 – 1.66 (m, 2H), 1.27 (d, *J* = 17.7 Hz, 17H), 0.87 (t, *J* = 6.9 Hz, 3H). **13C NMR (126 MHz, CDCl3)** δ 169.03, 167.15, 139.39, 136.02, 131.02, 127.67, 127.32, 126.06, 125.33, 120.96, 65.21, 32.12, 29.86, 29.84, 29.79, 29.75, 29.56, 29.49, 28.88, 26.17, 24.45, 22.89, 14.33. **HRMS (ESI)**: Calculated mass for C22H34NO3 [M+H]+: 374.2695.; observed mass: 374.2693.

**(4*S*,7*S*)-Octahydro-1*H*-4,7-methanoinden-5-yl (*E*)-3-(2-acetamidophenyl)acrylate (55):**

**Physical appearance:** Yellowish viscous liquid

**Column material:** 100-200 mesh silica

**Eluent**: petroleum ether/ethyl acetate (70/30, v/v).

**Yield:** 83%

**1H NMR (500 MHz, CDCl3)** δ 7.78 (t, *J* = 12.2 Hz, 2H), 7.55 (d, *J* = 7.6 Hz, 1H), 7.41 – 7.35 (m, 1H), 7.19 (t, *J* = 7.3 Hz, 1H), 6.37 (d, *J* = 15.7 Hz, 1H), 4.67 (d, *J* = 6.5 Hz, 1H), 2.23 (s, 3H), 2.13 (s, 1H), 2.06 (d, *J* = 3.5 Hz, 1H), 1.88 – 1.81 (m, 3H), 1.73 (ddd, *J* = 18.8, 14.8, 7.2 Hz, 4H), 1.48 (d, *J* = 13.2 Hz, 1H), 1.36 (dd, *J* = 22.6, 10.6 Hz, 2H), 0.96 (ddd, *J* = 19.4, 12.6, 5.5 Hz, 2H). **13C NMR (126 MHz, CDCl3)** δ 169.15, 166.97, 139.23, 136.10, 130.92, 127.72, 127.23, 125.98, 125.36, 121.22, 77.81, 47.46, 46.39, 43.18, 39.79, 39.30, 32.20, 31.85, 29.64, 27.91, 24.36. **HRMS (ESI)**: Calculated mass for C21H24NO3Na [M+Na]+: 340.1913.; observed mass: 340.1910.

**(*E*)-*N*-(2-(3-Oxobut-1-en-1-yl)phenyl)acetamide (56):**

**Physical appearance:** Yellow oily liquid

**Column material:** 100-200 mesh silica

**Eluent**: petroleum ether/ethyl acetate (80/20, v/v).

**Yield:** 90%

**1H NMR (400 MHz, CDCl3)** δ 7.71 – 7.63 (m, 2H), 7.57 (d, *J* = 7.7 Hz, 1H), 7.45 (s, 1H), 7.39 (t, *J* = 7.6 Hz, 1H), 7.22 (t, *J* = 7.5 Hz, 1H), 6.69 (d, *J* = 16.0 Hz, 1H), 2.36 (s, 3H), 2.24 (s, 3H). **13C NMR (126 MHz, CDCl3)** δ 198.34, 169.20, 138.06, 136.38, 131.24, 128.63, 128.19, 127.28, 126.33, 125.74, 28.71, 24.32. **HRMS (ESI)**: Calculated mass for C12H14NO2 [M+H]+: 204.1025.; observed mass: 204.1025.

**(*E*)-*N*-(4-Acetyl-2-(2-(phenylsulfonyl)vinyl)phenyl)acetamide (57):**

**Physical appearance:** Yellow oily liquid

**Column material:** 100-200 mesh silica

**Eluent**: petroleum ether/ethyl acetate (80/20, v/v).

**Yield:** 82%

**1H NMR (500 MHz, CDCl3)** δ 8.00 (d, *J* = 1.4 Hz, 2H), 7.98 – 7.92 (m, 3H), 7.84 (d, *J* = 15.2 Hz, 1H), 7.67 (t, *J* = 7.4 Hz, 1H), 7.59 (t, *J* = 7.7 Hz, 2H), 6.93 (d, *J* = 15.2 Hz, 1H), 2.56 (s, 3H), 2.29 (s, 3H).**13C NMR (101 MHz, CDCl3)** δ 196.71, 140.61, 139.87, 136.51, 134.13, 131.81, 130.86, 129.80, 128.08, 127.71, 26.74, 24.58. **HRMS (ESI)**: Calculated mass for C18H16NO4SNa [M+Na]+: 366.0776; observed mass: 366.0778.

**Methyl (*E*)-4-acetamido-3-(3-((2,2,3,3,4,4,5,5,6,6,7,7-dodecafluoroheptyl)oxy)-3-oxoprop-1-en-1-yl)benzoate (58):**

**Physical appearance:** Yellow oily liquid

**Column material:** 100-200 mesh silica

**Eluent**: petroleum ether/ethyl acetate (75/25, v/v).

**Yield:** 84%

**1H NMR (500 MHz, CDCl3)** δ 8.22 (s, 1H), 8.04 (d, *J* = 7.4 Hz, 1H), 7.87 (d, *J* = 15.8 Hz, 1H), 7.50 (s, 1H), 6.53 (d, *J* = 15.8 Hz, 1H), 6.07 (tt, *J* = 51.8, 5.0 Hz, 1H), 4.73 (t, *J* = 13.4 Hz, 2H), 3.93 (s, 3H), 2.25 (s, 3H). **13C NMR (101 MHz, CDCl3)** δ 166.14, 164.95, 140.86, 140.13, 132.60, 131.05, 129.14, 119.79, 107.79, 60.36, 60.10, 59.82, 52.57, 29.91, 24.58. **HRMS (ESI)**: Calculated mass for C20H14F12NO5K [M+K]+: 615.0317.; observed mass: 615.0315.

**(*E*)-*N*-(5-Methoxy-2-(2-(methylsulfonyl)vinyl)phenyl)acetamide (59):**

**Physical appearance:** Colorless oil

**Column material:** 100-200 mesh silica

**Eluent**: petroleum ether/ethyl acetate (72/28, v/v).

**Yield:** 89%

**1H NMR (500 MHz, CDCl3)** δ 8.12 (s, 1H), 7.64 (d, *J* = 15.2 Hz, 1H), 7.41 (d, *J* = 8.6 Hz, 1H), 7.20 (s, 1H), 6.73 (dd, *J* = 19.3, 11.3 Hz, 2H), 3.79 (s, 3H), 3.01 (s, 3H), 2.20 (s, 3H).**13C NMR (126 MHz, CDCl3)** δ 169.89, 162.64, 139.16, 138.54, 128.66, 124.56, 118.11, 113.20, 110.60, 55.74, 43.58, 24.20. **HRMS (ESI)**: Calculated mass for C12H14NO4SNa [M+Na]+: 291.0541.; observed mass: 291.0541.

**Methyl (*E*)-3-(1-pivalamidonaphthalen-2-yl)acrylate (60):**

**Physical appearance:** Colorless oil

**Column material:** 100-200 mesh silica

**Eluent**: petroleum ether/ethyl acetate (85/15, v/v).

**Yield:** 87%

**1H NMR (400 MHz, CDCl3)** δ 7.84 (d, *J* = 16.0 Hz, 1H), 7.82 – 7.77 (m, 2H), 7.73 (d, *J* = 8.7 Hz, 1H), 7.61 (d, *J* = 8.7 Hz, 1H), 7.51 (d, *J* = 3.0 Hz, 3H), 6.42 (d, *J* = 16.0 Hz, 1H), 3.79 (s, 3H), 1.45 (s, 9H). **13C NMR (101 MHz, CDCl3)** δ 178.18, 167.50, 140.48, 134.98, 132.81, 130.88, 129.33, 128.49, 128.20, 127.43, 127.38, 123.32, 122.97, 119.50, 53.63, 51.89, 39.79, 27.97. **HRMS (ESI)**: Calculated mass for C19H22NO3 [M+H]+: 312.1600.; observed mass: 312.1658.

**Butyl (*E*)-3-(1-pivalamidonaphthalen-2-yl)acrylate (61):**

**Physical appearance:** Colorless oil

**Column material:** 100-200 mesh silica

**Eluent**: petroleum ether/ethyl acetate (83/17, v/v).

**Yield:** 90%

**1H NMR (400 MHz, CDCl3)** δ 7.75 – 7.59 (m, 5H), 7.44 (dd, *J* = 10.4, 4.9 Hz, 3H), 6.27 (d, *J* = 16.0 Hz, 1H), 4.14 (t, *J* = 6.6 Hz, 2H), 1.68 – 1.60 (m, 2H), 1.41 (dd, *J* = 15.1, 7.5 Hz, 2H), 1.36 (s, 9H), 0.95 (t, *J* = 7.4 Hz, 3H).**13C NMR (101 MHz, CDCl3)** δ 178.21, 167.06, 139.98, 134.80, 132.85, 130.79, 129.18, 128.30, 127.93, 127.22, 127.10, 123.46, 122.76, 119.68, 64.53, 39.60, 30.88, 27.79, 19.36, 13.89. **HRMS (ESI)**: Calculated mass for C22H28NO3 [M+H]+: 354.2069.; observed mass: 354.2066.

**2.21. Characterization data of *ortho*-C−H olefinated products of silanols:**

**Methyl (*E*)-3-(2-((hydroxydiisopropylsilyl)methyl)phenyl)acrylate (62):**2

**Physical appearance:** Colorless oil

**Column material:** 100-200 mesh silica

**Eluent**: petroleum ether/ethyl acetate (92/8, v/v).

**Yield:** 69%

**1H NMR (400 MHz, CDCl3)** δ 7.22 (t, *J* = 9.3 Hz, 2H), 7.13 (dd, *J* = 14.8, 7.3 Hz, 2H), 7.09 – 7.03 (m, 1H), 6.06 (d, *J* = 11.8 Hz, 1H), 3.67 (s, 3H), 2.19 (s, 2H), 1.09 – 0.94 (m, 12H).**13C NMR (101 MHz, CDCl3)** δ 168.09, 144.94, 138.07, 134.52, 129.45, 129.29, 128.95, 124.53, 121.20, 51.93, 19.70, 17.68, 17.50, 13.23.

**Butyl (*E*)-3-(2-((hydroxydiisopropylsilyl)methyl)-3-methylphenyl)acrylate (63):**

**Physical appearance:** Colorless oil

**Column material:** 100-200 mesh silica

**Eluent**: petroleum ether/ethyl acetate (90/10, v/v).

**Yield:** 82%

**1H NMR (400 MHz, CDCl3)** δ 8.10 (d, *J* = 15.7 Hz, 1H), 7.39 (d, *J* = 7.7 Hz, 1H), 7.16 (d, *J* = 7.3 Hz, 1H), 7.03 (t, *J* = 7.6 Hz, 1H), 6.31 (d, *J* = 15.7 Hz, 1H), 4.20 (t, *J* = 6.7 Hz, 2H), 2.37 (s, 2H), 2.34 (s, 3H), 1.68 (dd, *J* = 14.8, 6.9 Hz, 2H), 1.44 (dq, *J* = 14.7, 7.4 Hz, 2H), 1.03 (d, *J* = 5.8 Hz, 6H), 0.99 – 0.94 (m, 5H), 0.92 (d, *J* = 5.1 Hz, 6H). **13C NMR (101 MHz, CDCl3)** δ 167.58, 144.21, 139.03, 136.45, 132.77, 132.28, 124.80, 124.75, 119.18, 64.66, 31.00, 21.55, 19.43, 17.47, 17.28, 16.51, 13.96, 13.66. **HRMS (ESI)**: Calculated mass for C21H33O3SiNa [M+Na]+: 384.2097.; observed mass: 384.2096.

**Ethyl (*E*)-3-(4-chloro-3-fluoro-2-((hydroxydiisopropylsilyl)methyl)phenyl)acrylate (64):**

**Physical appearance:** Colorless oil

**Column material:** 100-200 mesh silica

**Eluent**: petroleum ether/ethyl acetate (85/15, v/v).

**Yield: 7**8%

**1H NMR (500 MHz, CDCl3)** δ 7.94 (d, *J* = 15.8 Hz, 1H), 7.28 (d, *J* = 8.5 Hz, 1H), 7.16 (d, *J* = 7.7 Hz, 1H), 6.33 (d, *J* = 15.8 Hz, 1H), 4.26 (q, *J* = 7.1 Hz, 2H), 2.36 (d, *J* = 2.9 Hz, 2H), 1.33 (t, *J* = 7.1 Hz, 3H), 1.04 (d, *J* = 4.5 Hz, 6H), 1.00 (d, *J* = 2.3 Hz, 6H). **13C NMR (101 MHz, CDCl3)** δ 166.94, 157.22, 154.80, 141.31, 141.28, 133.10, 129.64, 129.47, 126.50, 122.63, 122.59, 122.41, 120.49, 60.97, 17.29, 17.20, 14.49, 13.30, 12.45, 12.42. **HRMS (ESI)**: Calculated mass for C18H25ClFO3SiNa [M+Na]+: 394.1143.; observed mass: 394.1142.

**2.22. Characterization data of atropisomerization of biaryls:**

**Ethyl (*E*)-3-(1-(4,5-dimethoxy-2-((*E*)-(methoxyimino)methyl)phenyl)naphthalen-2-yl)acrylate (65):**

**Physical appearance:** White solid

**Column material:** 100-200 mesh silica

**Eluent**: petroleum ether/ethyl acetate (83/17, v/v).

**Yield:** 62%

**1H NMR (400 MHz, CDCl3)** δ 7.64 (dd, *J* = 7.5, 5.1 Hz, 3H), 7.47 (dd, *J* = 13.6, 6.0 Hz, 3H), 7.40 – 7.35 (m, 3H), 6.84 (s, 1H), 6.40 (d, *J* = 17.3 Hz, 1H), 4.22 (q, *J* = 7.1 Hz, 2H), 3.99 (s, 3H), 3.95 (s, 3H), 3.92 (s, 3H), 1.30 (t, *J* = 7.1 Hz, 3H). **13C NMR (101 MHz, CDCl3)** δ 166.45, 150.42, 148.77, 147.94, 140.47, 138.51, 135.69, 130.65, 130.44, 129.04, 128.82, 127.65, 127.28, 127.22, 122.34, 112.70, 107.90, 62.04, 60.68, 56.24, 56.15, 14.39. **HRMS (ESI)**: Calculated mass for C25H26NO5 [M+H]+: 420.1811.; observed mass: 420.1810. Enantiomeric ratio was determined by HPLC with a Daicel Chiralpak AD-H, n-hexane/2-propanol = 95/5, v = 1.0 mL⋅min-1, λ = 290 nm, t (minor) = 5.043 min, t (major) = 4.354 min, 96:4 er.

**(*E*)-4,5-Dimethoxy-2-(2-((*E*)-2-(phenylsulfonyl)vinyl)naphthalen-1-yl)benzaldehyde O-methyl oxime (66):**

**Physical appearance:** Colorless oil

**Column material:** 100-200 mesh silica

**Eluent**: petroleum ether/ethyl acetate (95/5, v/v).

**Yield: 67**%

**1H NMR (400 MHz, CDCl3)** δ 7.89 – 7.84 (m, 2H), 7.82 (d, *J* = 7.8 Hz, 2H), 7.64 – 7.58 (m, 3H), 7.55 – 7.48 (m, 3H), 7.43 – 7.34 (m, 3H), 7.28 (s, 1H), 6.81 (d, *J* = 15.5 Hz, 1H), 6.58 (s, 1H), 4.08 (s, 3H), 3.81 (s, 6H). **13C NMR (101 MHz, CDCl3)** δ 150.47, 148.82, 147.97, 140.79, 140.51, 138.70, 135.73, 133.85, 130.46, 129.55, 129.06, 128.13, 127.94, 127.68, 127.31, 127.25, 122.40, 112.76, 107.97, 62.07, 56.28, 56.18. **HRMS (ESI)**: Calculated mass for C28H26NO5S [M+H]+: 488.1532.; observed mass: 488.1531. Enantiomeric ratio was determined by HPLC with a Daicel Chiralpak AD-H, n-hexane/2-propanol = 95/5, v = 1.0 mL⋅min-1, λ = 270 nm, t (minor) = 12.487 min, t (major) = 16.600 min, 90:10 er.

**2.23. Characterization data of *meta*-olefinated products:**

**Ethyl (*E*)-3-(3-(((2-cyano-5-methoxyphenoxy)sulfonyl)methyl)phenyl)acrylate (67):**

**Physical appearance**: Yellowish oil.

**Column material:** 100-200 mesh silica

**Eluent**: petroleum ether/ethyl acetate (90/10, v/v).

**Yield**: 78%

**1H NMR (500 MHz, CDCl3)** δ 7.69 – 7.66 (m, 2H), 7.59 – 7.58 (m, 2H), 7.54 (d, *J* = 7.8 Hz, 1H), 7.46 (t, *J* = 7.7 Hz, 1H), 6.91 – 6.88 (m, 2H), 6.48 (d, *J* = 16.1 Hz, 1H), 4.73 (s, 2H), 4.27 (q, *J* = 7.1 Hz, 2H), 3.84 (s, 3H), 1.34 (t, *J* = 7.1 Hz, 3H).**13C NMR (126 MHz, CDCl3)** δ 166.89, 164.36, 151.86, 143.53, 135.72, 134.63, 132.83, 130.75, 129.92, 129.23, 127.48, 119.88, 115.72, 114.14, 109.40, 98.83, 60.86, 58.48, 56.34, 14.51. **HRMS (ESI)**: Calculated mass for C20H20NO6S [M+H]+: 402.1011.; observed mass: 402.1010.

**2-Cyano-5-methoxyphenyl (*E*)-(3-(2-(phenylsulfonyl)vinyl)phenyl)methanesulfonate (68):**

**Physical appearance**: Colorless gummy.

**Column material:** 100-200 mesh silica

**Eluent**: petroleum ether/ethyl acetate (82/18, v/v).

**Yield**: 70%

**1H NMR (400 MHz, CDCl3) δ** 7.95 (d, *J* = 7.3 Hz, 2H), 7.70 (s, 1H), 7.65 – 7.53 (m, 7H), 7.47 (t, *J* = 7.7 Hz, 1H), 6.96 (s, 1H), 6.90 (dt, *J* = 8.7, 2.1 Hz, 2H), 4.71 (s, 2H), 3.85 (s, 3H), **13C NMR (101 MHz, CDCl3) δ** 171.06, 164.36, 151.74, 141.36, 140.57, 134.66, 133.80, 133.76, 131.03, 130.14, 129.96, 129.61, 128.93, 127.99, 127.78, 115.74, 114.08, 109.39, 98.63, 62.40, 58.30, 56.36, 21.05. **HRMS (ESI)**: Calculated mass for C23H20NO6S2 [M+H]+: 470.0732.; observed mass: 470.0730.

**Dimethyl 2-(3-(((2-cyano-5-methoxyphenoxy)sulfonyl)methyl)phenyl)maleate (69):**

**Physical appearance**: White solid.

**Column material:** 100-200 mesh silica

**Eluent**: petroleum ether/ethyl acetate (80/20, v/v).

**Yield**: 73%

**1H NMR (500 MHz, CDCl3)** δ 7.59 (d, *J* = 8.5 Hz, 1H), 7.54 (d, *J* = 7.7 Hz, 1H), 7.45 (t, *J* = 7.7 Hz, 1H), 7.39 (s, 1H), 7.32 (d, *J* = 7.8 Hz, 1H), 7.06 (s, 1H), 6.90 (d, *J* = 2.3 Hz, 1H), 6.88 (s, 1H), 4.72 (s, 2H), 3.84 (s, 3H), 3.79 (s, 3H), 3.58 (s, 3H).**13C NMR (101 MHz, CDCl3)** δ 166.49, 165.53, 164.32, 151.88, 143.21, 134.95, 134.60, 131.84, 131.43, 130.32, 129.80, 128.79, 126.20, 115.72, 114.10, 109.51, 98.92, 58.51, 56.33, 53.24, 52.22. **HRMS (ESI)**: Calculated mass for C21H20NO8S [M+H]+: 446.0910.; observed mass: 446.0999.

**2-Cyano-5-metoxyphenyl 3-(1-methyl-2,5-dioxo-2,5-dihydro-1*H*- pyrrol-3-yl)phenyl)methanesulfonate (70):**

**Physical appearance**: Greenish oil.

**Column material:** 100-200 mesh silica

**Eluent**: petroleum ether/ethyl acetate (75/25, v/v).

**Yield**: 76%

**1H NMR** **(500 MHz, CDCl3)** δ 8.07 (s, 1H), 7.99 (d, *J* = 7.9 Hz, 1H), 7.64 (d, *J* = 7.8 Hz, 1H), 7.58 (d, *J* = 8.7 Hz, 1H), 7.53 (t, *J* = 7.8 Hz, 1H), 6.93 (d, *J* = 2.3 Hz, 1H), 6.89 (dd, *J* = 8.7, 2.4 Hz, 1H), 6.81 (s, 1H), 4.76 (s, 2H), 3.84 (s, 3H), 3.08 (s, 3H).**13C NMR** **(126 MHz, CDCl3)** δ 170.68, 170.31, 164.33, 151.73, 143.11, 134.67, 133.66, 131.27, 129.95, 129.88, 129.82, 127.64, 125.21, 115.68, 114.05, 109.38, 98.67, 58.34, 56.34, 24.12. **HRMS (ESI)**: Calculated mass for C20H17N2O6S [M+H]+: 413.0807.; observed mass: 413.0806.

**2-Cyano-5-methoxyphenyl (*E*)-(3-(2-(diethoxyphosphoryl)vinyl)-4-methylphenyl)methanesulfonate (71):**

**Physical appearance**: Colorless oil.

**Column material:** 100-200 mesh silica

**Eluent**: petroleum ether/ethyl acetate (85/15, v/v).

**Yield**: 72%

**1H NMR** **(400 MHz, CDCl3)** δ 7.77 (dd, *J* = 22.8, 17.4 Hz, 1H), 7.66 (d, *J* = 1.4 Hz, 1H), 7.59 (d, *J* = 8.6 Hz, 1H), 7.45 – 7.42 (m, 1H), 7.28 (d, *J* = 3.9 Hz, 1H), 6.93 – 6.88 (m, 2H), 6.27 (t, *J* = 17.8 Hz, 1H), 4.70 (s, 2H), 4.17 (p, *J* = 6.8 Hz, 4H), 3.85 (s, 3H), 2.45 (s, 3H), 1.36 (t, *J* = 7.1 Hz, 6H).**13C NMR** **(101 MHz, CDCl3)** δ 164.34, 151.94, 139.04, 134.61, 132.46, 131.85, 128.91, 124.65, 114.04, 109.39, 98.73, 62.23, 58.33, 56.32, 19.79, 16.62, 16.56. **HRMS (ESI)**: Calculated mass for C22H27NO7PS [M+H]+: 480.1246.; observed mass: 480.1244.

**Methyl (*E*)-3-(5-(((2-cyano-5-methoxyphenoxy)sulfonyl)methyl)-2-fluoro-4-(trifluoromethyl)phenyl)acrylate (72):**

**Physical appearance**: Colorless oil.

**Column material:** 100-200 mesh silica

**Eluent**: petroleum ether/ethyl acetate (90/10, v/v).

**Yield**: 75%

**1H NMR** **(400 MHz, CDCl3)** δ 7.96 (s, 1H), 7.79 (d, *J* = 8.2 Hz, 1H), 7.69 (s, 1H), 7.60 (d, *J* = 8.7 Hz, 1H), 6.98 (d, *J* = 2.2 Hz, 1H), 6.92 (dd, *J* = 8.7, 2.2 Hz, 1H), 6.57 (d, *J* = 16.1 Hz, 1H), 4.98 (s, 2H), 3.87 (s, 3H), 3.83 (s, 3H).**13C NMR** **(126 MHz, CDCl3)** δ 166.78, 164.39, 151.46, 142.03, 138.81, 134.76, 132.86, 129.01, 127.93, 127.89, 125.91, 122.01, 115.57, 114.29, 109.46, 98.92, 56.37, 54.86, 52.21. **HRMS (ESI)**: Calculated mass for C20H16F4NO6S [M+H]+: 474.0634.; observed mass: 474.0633.

**Ethyl (*E*)-3-(3-(((2-cyano-4-methoxyphenoxy)diisopropylsilyl)methyl)phenyl)acrylate (73):**

**Physical appearance:** Colorless oil.

**Column material:** 100-200 mesh silica

**Eluent**: petroleum ether/ethyl acetate (92/8, v/v).

**Yield**: 89%

**1H NMR (500 MHz, CDCl3)** δ 7.57 (d, *J* = 16.0 Hz, 1H), 7.41 (d, *J* = 8.7 Hz, 1H), 7.24 – 7.15 (m, 4H), 6.50 (dd, *J* = 8.7, 2.0 Hz, 1H), 6.32 (d, *J* = 16.0 Hz, 1H), 6.05 (d, *J* = 1.8 Hz, 1H), 4.26 (q, *J* = 7.1 Hz, 2H), 3.67 (s, 3H), 2.45 (s, 2H), 1.34 (t, *J* = 7.1 Hz, 3H), 1.30 – 1.27 (m, 2H), 1.10 (d, *J* = 7.4 Hz, 6H), 1.07 (d, *J* = 7.4 Hz, 6H).**13C NMR (126 MHz, CDCl3)** δ 167.27, 164.24, 159.53, 144.87, 138.95, 134.72, 134.64, 131.04, 129.19, 128.68, 124.69, 118.24, 117.56, 108.00, 105.53, 97.35, 60.70, 55.70, 21.10, 17.58, 17.49, 14.54, 13.01. **HRMS (ESI)**: Calculated mass for C26H34NO4Si [M+ H]+: 452.2257.; observed mass: 452.2257.

**(*S*)-2-(((5-(2-Acetylcyclopent-2-en-1-yl)-2,3-dimethylbenzyl)diisopropylsilyl)oxy)-5-methoxybenzonitrile (74):**

**Physical appearance:** Colorless gummy.

**Column material:** 100-200 mesh silica

**Eluent**: petroleum ether/ethyl acetate (75/25, v/v).

**Yield**: 92%

**1H NMR (500 MHz, CDCl3)** δ 7.34 (d, *J* = 8.7 Hz, 1H), 6.96 (d, *J* = 1.3 Hz, 1H), 6.74 (d, *J* = 11.0 Hz, 2H), 6.44 (dd, *J* = 8.7, 2.2 Hz, 1H), 5.52 (d, *J* = 2.2 Hz, 1H), 4.01 (d, *J* = 6.4 Hz, 1H), 3.56 (s, 3H), 3.50 (s, 3H), 2.64 – 2.44 (m, 3H), 2.41 (d, *J* = 10.1 Hz, 2H), 2.11 (s, 3H), 2.11 (s, 3H), 1.83-1.78 (m, 1H), 1.31 (td, *J* = 15.5, 7.6 Hz, 2H), 1.18 (d, *J* = 7.4 Hz, 3H), 1.15 (d, *J* = 7.4 Hz, 3H), 1.06 (d, *J* = 7.4 Hz, 3H), 1.02 (d, *J* = 7.4 Hz, 3H).**13C NMR (126 MHz, CDCl3)** δ 165.29, 164.13, 159.43, 144.97, 142.06, 139.21, 137.27, 136.50, 134.01, 132.19, 125.97, 125.53, 117.63, 108.44, 104.49, 96.75, 55.49, 51.31, 49.60, 34.36, 32.25, 21.09, 18.87, 17.67, 17.59, 17.44, 17.34, 15.65, 12.82, 12.67. **HRMS (ESI)**: Calculated mass for C30H40NO3Si [M+H]+: 490.2777.; observed mass: 490.2776.

**2-Cyano-5-methoxyphenyl ethyl (*E*)-(3-methoxy-5-(3-oxobut-1-en-1-yl)benzyl)phosphonate (75):**

**Physical appearance:** Colorless oil.

**Column material:** 100-200 mesh silica

**Eluent:** petroleum ether/ethyl acetate (90/10, v/v).

**Yield**: 72%

**1H NMR** **(400 MHz, CDCl3)** δ 7.47 (d, *J* = 8.8 Hz, 1H), 7.43 (d, *J* = 16.3 Hz, 1H), 7.14 (s, 1H), 6.95 (d, *J* = 1.7 Hz, 2H), 6.85 (d, *J* = 9.1 Hz, 1H), 6.70 (dd, *J* = 15.5, 9.2 Hz, 2H), 4.26 – 4.14 (m, 2H), 3.81 (s, 3H), 3.76 (s, 3H), 3.42 (d, *J* = 21.9 Hz, 2H), 2.38 (d, *J* = 6.9 Hz, 3H), 1.28 (t, *J* = 7.1 Hz, 3H).**13C NMR** **(101 MHz, CDCl3)** δ 198.65, 164.29, 160.37, 160.34, 154.12, 143.00, 136.38, 136.36, 134.36, 132.35, 132.28, 128.00, 122.88, 122.83, 117.96, 117.91, 116.17, 112.57, 112.54, 111.99, 106.76, 106.74, 97.25, 64.19, 64.13, 56.07, 55.65, 34.74, 33.64, 29.89, 27.81, 16.51, 16.46. **HRMS (ESI)**: Calculated mass for C22H25NO6P [M+H]+: 430.1419.; observed mass: 430.1409.

**2-Cyano-5-methoxyphenyl ethyl (*E*)-(2,6-dichloro-3-(2-(phenylsulfonyl)vinyl)benzyl)phosphonate (76):**

**Physical appearance:** Yellowish oil.

**Column material:** 100-200 mesh silica

**Eluent:** petroleum ether/ethyl acetate (85/15, v/v).

**Yield:** 75%

**1H NMR (500 MHz, CDCl3)** δ 8.04 (d, *J* = 15.4 Hz, 1H), 7.96 (d, *J* = 7.7 Hz, 2H), 7.65 (t, *J* = 7.4 Hz, 1H), 7.57 (t, *J* = 7.7 Hz, 2H), 7.48 (d, *J* = 8.7 Hz, 1H), 7.39 – 7.35 (m, 2H), 7.07 (s, 1H), 6.84 (d, *J* = 15.4 Hz, 1H), 6.73 (dd, *J* = 8.7, 2.3 Hz, 1H), 4.28 – 4.19 (m, 2H), 3.94 (dd, *J* = 22.7, 1.5 Hz, 2H), 3.80 (s, 3H), 1.27 (t, *J* = 6.2 Hz, 3H).**13C NMR** **(126 MHz, CDCl3)** δ 164.27, 153.79, 140.19, 138.52, 138.35, 136.94, 134.55, 133.9.3, 131.22, 130.91, 129.85, 129.69, 128.84, 128.12, 127.74, 127.70, 115.84, 11.99, 106.67, 97.39, 64.41, 64.35, 56.14, 16.46, 16.41. **HRMS (ESI)**: Calculated mass for C25H23Cl2NO6PS [M+H]+: 556.0361.; observed mass: 556.0360.

**Ethyl (*E*)-3-(4-chloro-3-(2-(2-cyano-5-methoxyphenoxy)-2-oxoethyl)-2-fluorophenyl)acrylate (77):**

**Physical appearance**: Colorless gummy.

**Column material**:100-200 mesh silica

**Eluent**: petroleum ether/ethyl acetate (90/10, v/v).

**Yield**: 87%

**1H NMR (400 MHz, CDCl3)** δ 7.74 (d, *J* = 16.2 Hz, 1H), 7.56 (t, *J* = 8.4 Hz, 2H), 7.33 (d, *J* = 8.5 Hz, 1H), 6.95 (d, *J* = 2.1 Hz, 1H), 6.89 (dd, *J* = 8.7, 2.2 Hz, 1H), 6.52 (d, *J* = 16.2 Hz, 1H), 5.03 (s, 2H), 4.25 (q, *J* = 7.1 Hz, 2H), 3.83 (s, 3H), 1.31 (t, *J* = 7.1 Hz, 3H).**13C NMR (101 MHz, CDCl3)** δ 166.37, 164.20, 161.60, 151.04, 138.20, 135.28, 134.78, 130.42, 126.34, 122.41, 122.35, 122.18, 115.18, 115.06, 114.09, 109.45, 99.12, 60.99, 56.27, 49.96, 14.38. **HRMS (ESI)**: Calculated mass for C21H18ClFNO5 [M+H]+: 418.0858.; observed mass: 418.0855.

**2-(2-Cyano-5-methoxyphenoxy)ethyl (*E*)-2-(2,6-dichloro-3-(2-(methylsulfonyl)vinyl)phenyl)acetate (78):**

**Physical appearance**: Colorless gummy.

**Column material**:100-200 mesh silica

**Eluent**: petroleum ether/ethyl acetate (85/15, v/v).

**Yield**: 79%

**1H NMR (400 MHz, CDCl3)** δ 7.94 (d, *J* = 15.5 Hz, 1H), 7.49 – 7.44 (m, 2H), 7.37 (d, *J* = 8.5 Hz, 1H), 6.92 (d, *J* = 15.4 Hz, 1H), 6.54 (dd, *J* = 8.6, 1.9 Hz, 1H), 6.43 (d, *J* = 2.1 Hz, 1H), 4.53 – 4.51 (m, 2H), 4.26 – 4.23 (m, 2H), 4.11 (s, 2H), 3.84 (s, 3H), 3.04 (s, 3H).**13C NMR (101 MHz, CDCl3) δ** 169.18, 164.65, 161.62, 139.81, 138.81, 137.09, 135.33, 132.59, 130.15, 129.86, 128.50, 127.79, 116.71, 106.53, 99.68, 94.55, 66.76, 63.04, 55.95, 43.29, 37.22. **HRMS (ESI)**: Calculated mass for C21H20Cl2NO6S [M+H]+: 484.0388.; observed mass: 484.0386.

**Methyl (*E*)-3-(2,4-dichloro-3-(2-(3-(2-cyano-5-methoxyphenoxy)propoxy)-2-oxoethyl)phenyl)acrylate (79):**

**Physical appearance**: Colorless gummy.

**Column material**:100-200 mesh silica

**Eluent**: petroleum ether/ethyl acetate (80/20, v/v).

**Yield**: 72%

**1H NMR (500 MHz, CDCl3) δ** 8.01 (d, *J* = 16.0 Hz, 1H), 7.47 (dd, *J* = 8.6, 4.2 Hz, 2H), 7.33 (t, *J* = 8.0 Hz, 1H), 6.51 (dd, *J* = 8.6, 2.2 Hz, 1H), 6.37 (dd, *J* = 9.1, 6.9 Hz, 2H), 4.37 (t, *J* = 6.1 Hz, 2H), 4.07 (s, 2H), 4.04 – 4.02 (m, 2H), 3.85 (s, 3H), 3.82 (s, 3H), 2.20 – 2.15 (m, 2H).**13C NMR (101 MHz, CDCl3)** δ 169.21, 166.82, 164.70, 162.09, 140.49, 137.63, 136.65, 135.17, 132.47, 132.45, 128.27, 127.18, 121.52, 116.90, 106.09, 99.54, 94.56, 65.45, 61.86, 55.92, 52.14, 37.46, 28.49. **HRMS (ESI)**: Calculated mass for C23H22Cl2NO6 [M+H]+: 478.0824.; observed mass: 478.0821.

**Ethyl (*E*)-3-(2,4-dichloro-3-(2-((5-(2-cyano-5-methoxyphenoxy)pentyl)oxy)-2-oxoethyl)phenyl)acrylate (80):**

**Physical appearance**: Colorless gummy.

**Column material**:100-200 mesh silica

**Eluent**: petroleum ether/ethyl acetate (75/25, v/v).

**Yield**: 60%

**1H NMR (500 MHz, CDCl3) δ** 8.04 (d, *J* = 15.9 Hz, 1H), 7.48 (dd, *J* = 10.9, 8.7 Hz, 2H), 7.35 (d, *J* = 8.5 Hz, 1H), 6.50 (dd, *J* = 8.6, 1.8 Hz, 1H), 6.42 (s, 1H), 6.38 (d, *J* = 15.9 Hz, 1H), 4.27 (q, *J* = 7.1 Hz, 2H), 4.17 (t, *J* = 6.4 Hz, 2H), 4.07 (s, 2H), 4.00 (t, *J* = 6.3 Hz, 2H), 3.84 (s, 3H), 1.87 – 1.81 (m, 2H), 1.71 (dd, *J* = 14.4, 6.9 Hz, 2H), 1.54 (dt, *J* = 14.9, 7.6 Hz, 2H), 1.33 (t, *J* = 7.1 Hz, 3H).**13C NMR** **(101 MHz, CDCl3)** δ 169.48, 166.45, 164.71, 162.45, 140.35, 137.62, 136.72, 135.14, 132.59, 132.49, 128.25, 127.13, 121.92, 117.09, 105.96, 99.45, 94.51, 68.86, 65.26, 61.01, 55.89, 37.45, 28.5, 28.36, 22.5, 14.49. **HRMS (ESI)**: Calculated mass for C26H28Cl2NO6 [M+H]+: 520.1294.; observed mass: 520.1290.

**2-Cyano-5-methoxyphenyl (*E*)-3'-(3-oxo-1-phenylprop-1-en-1-yl)-[1,1'-biphenyl]-2-carboxylate (81):**

**Physical appearance**: White solid.

**Column material**:100-200 mesh silica

**Eluent**: petroleum ether/ethyl acetate (90/10, v/v).

**Yield**: 74%

**1H NMR** **(400 MHz, CDCl3)** δ 9.52 (d, *J* = 8.0 Hz, 1H), 8.19 (dd, *J* = 7.8, 1.0 Hz, 1H), 7.64 (td, *J* = 7.6, 1.4 Hz, 1H), 7.57 (d, *J* = 8.7 Hz, 1H), 7.54 (ddd, *J* = 9.0, 3.4, 1.4 Hz, 1H), 7.51 – 7.48 (m, 1H), 7.46 - 7.38 (m, 6H), 7.36 – 7.33 (m, 1H), 7.30 (dd, *J* = 8.1, 1.5 Hz, 2H), 6.84 - 6.81 (m, 1H), 6.62 (d, *J* = 3.7 Hz, 1H), 6.60 (d, *J* = 1.9 Hz, 1H), 3.83 (s, 3H).**13C NMR** **(126 MHz, CDCl3)** δ 193.63, 164.89, 164.12, 162.16, 154.10, 143.37, 141.64, 139.91, 136.68, 134.45, 133.00, 131.40, 131.27, 131.12, 131.00, 129.79, 128.90, 128.66, 128.59, 128.20, 128.06, 127.83, 115.76, 112.45, 109.17, 99.03, 56.14. **HRMS (ESI)**: Calculated mass for C30H22NO4 [M+H]+: 460.1549.; observed mass: 460.1547.

**Ethyl (*E*)-3-(4-chloro-3-(2-((2-cyanophenyl)amino)-2-oxoethyl)-2-fluorophenyl)acrylate (82):**

**Physical appearance**: Colorless oil.

**Column material**:100-200 mesh silica

**Eluent**: petroleum ether/ethyl acetate (70/30, v/v).

**Yield**: 80%

**1H NMR** **(500 MHz, CDCl3)** δ 8.40 (d, *J* = 8.4 Hz, 1H), 7.78 (s, 1H), 7.59 – 7.55 (m, 2H), 7.49 (t, *J* = 8.1 Hz, 1H), 7.31 (d, *J* = 8.5 Hz, 1H), 7.17 (td, *J* = 7.7, 0.9 Hz, 1H), 6.53 (d, *J* = 16.2 Hz, 1H), 4.27 (q, *J* = 7.1 Hz, 2H), 4.04 (s, 2H), 1.33 (t, *J* = 7.1 Hz, 3H).**13C NMR** **(126 MHz, CDCl3)** δ 166.79, 166.63, 140.30, 137.48, 137.44, 135.94, 134.44, 132.38, 128.82, 126.06, 124.62, 122.14, 122.09, 121.37, 116.19, 61.00, 35.48, 14.48. **HRMS (ESI)**: Calculated mass for C20H17ClFN2O3 [M+H]+: 387.0912.; observed mass: 387.0911.

**Ethyl(*E*)-3-(5-(1-(2-cyano-4-methoxyphenoxy)-1-oxopropan-2-yl)-2-isobutylphenyl)acrylate (83):**

**Physical appearance**: Colorless oil.

**Column material**:100-200 mesh silica

**Eluent**: petroleum ether/ethyl acetate (90/10, v/v).

**Yield**: 69%

**1H NMR (500 MHz, CDCl3)** δ 8.00 (d, *J* = 15.8 Hz, 1H), 7.60 (s, 1H), 7.54 (d, *J* = 8.7 Hz, 1H), 7.37 (d, *J* = 7.7 Hz, 1H), 7.19 (d, *J* = 7.8 Hz, 1H), 6.81 (d, *J* = 6.7 Hz, 1H), 6.67 (d, *J* = 1.7 Hz, 1H), 6.41 (d, *J* = 15.8 Hz, 1H), 4.27 (q, *J* = 7.1 Hz, 2H), 4.03 (dt, *J* = 13.6, 6.8 Hz, 1H), 3.82 (s, 3H), 2.62 (d, *J* = 7.2 Hz, 2H), 1.84 – 1.80 (m, 1H), 1.69 (d, *J* = 7.2 Hz, 3H), 1.34 (t, *J* = 7.1 Hz, 3H), 0.92 (d, *J* = 6.5 Hz, 6H).**13C NMR** **(101 MHz, CDCl3)** δ 172.04, 167.26, 164.07, 154.14, 142.39, 141.10, 137.32, 134.33, 133.94, 131.79, 129.23, 128.63, 126.00, 119.82, 119.65, 115.64, 114.28, 112.81, 108.94, 108.46, 101.73, 98.85, 60.72, 56.10, 55.85, 45.36, 44.77, 42.83, 42.31, 34.04, 32.14, 30.61, 22.91, 22.62, 18.65, 18.39, 14.52, 14.33. **HRMS (ESI)**: Calculated mass for C26H30NO5 [M+H]+: 436.2124.; observed mass: 436.2122.

**Methyl (*E*)-3-(2-chloro-5-((1-(2-cyano-5-methoxyphenoxy)-2-methyl-1-oxopropan-2-yl)oxy)phenyl)acrylate (84):**

**Physical appearance**: Sticky oil.

**Column material**:100-200 mesh silica

**Eluent**: petroleum ether/ethyl acetate (85/15, v/v).

**Yield**: 72%

**1H NMR** **(500 MHz, CDCl3)** δ 8.03 (d, *J* = 16.0 Hz, 1H), 7.59 (d, *J* = 8.7 Hz, 1H), 7.34 (d, *J* = 8.8 Hz, 1H), 7.26 (s, 1H), 6.99 (dd, *J* = 8.8, 2.9 Hz, 1H), 6.86 (dd, *J* = 8.7, 2.3 Hz, 1H), 6.57 (d, *J* = 2.3 Hz, 1H), 6.38 (d, *J* = 16.0 Hz, 1H), 3.83 (s, 2H), 3.81 (s, 3H), 1.82 (s, 6H).**13C NMR** **(126 MHz, CDCl3)** δ 171.63, 166.98, 164.25, 154.23, 153.70, 140.54, 134.51, 133.66, 131.00, 128.94, 122.62, 121.07, 118.81, 115.52, 113.24, 108.74, 98.87, 80.22, 56.16, 52.12, 25.71. **HRMS (ESI)**: Calculated mass for C22H21ClNO6 [M+H]+: 430.1057.; observed mass: 430.1055.

**2.24. Characterization data of *para*-olefinated products:**

**Methyl (*E*)-3-(4-((((2'-cyano-4',5'-dimethoxy-[1,1'-biphenyl]-4-yl)oxy)diisopropylsilyl)methyl)phenyl)acrylate (85):**4

**Physical appearance**: Colorless gummy.

**Column material**: 100-200 mesh silica

**Eluent**: petroleum ether/ethyl acetate (80/20, v/v).

**Yield**: 82%

**1H NMR (400 MHz, CDCl3)** δ 7.64 (d, *J* = 16.0 Hz, 1H), 7.43 – 7.35 (m, 4H), 7.14 (t, *J* = 3.9 Hz, 3H), 6.89 (s, 1H), 6.87 – 6.85 (m, 2H), 6.37 (d, *J* = 16.0 Hz, 1H), 3.95 (s, 3H), 3.93 (s, 3H), 3.78 (s, 3H), 2.43 (s, 2H), 1.22 (d, *J* = 7.4 Hz, 2H), 1.06 (d, *J* = 7.4, 2.1 Hz, 6H), 1.04 (d, *J* = 7.4, 2.1 Hz, 6H). **13C NMR (101 MHz, CDCl3)** δ 167.93, 156.04, 152.72, 148.20, 145.15, 142.07, 140.15, 131.55, 130.95, 130.09, 129.54, 128.40, 120.15, 119.50, 116.41, 115.20, 112.49, 102.35, 56.48, 56.35, 51.81, 21.63, 17.63, 17.58, 13.14.

**2,2,3,3,4,4,5,5,6,6,7,7-Dodecafluoroheptyl (*E*)-3-(4-((((2'-cyano-4',5'-dimethoxy-[1,1'-biphenyl]-4-yl)oxy)diisopropylsilyl)methyl)phenyl)acrylate (86):**

**Physical appearance**: Colorless gummy.

**Column material**:100-200 mesh silica

**Eluent**: petroleum ether/ethyl acetate (86/14, v/v).

**Yield**: 77%

**1H NMR (500 MHz, CDCl3)** δ 7.73 (d, *J* = 16.0 Hz, 1H), 7.40 (dd, *J* = 11.4, 8.4 Hz, 4H), 7.17 – 7.14 (m, 3H), 6.89 – 6.86 (m, 3H), 6.41 (d, *J* = 16.0 Hz, 1H), 6.17 – 5.96 (m, 1H), 4.70 (t, *J* = 13.6 Hz, 2H), 3.96 (s, 3H), 3.93 (s, 3H), 2.44 (s, 2H), 1.25 – 1.20 (m, 2H), 1.05 (d, *J* = 7.3 Hz, 12H).**13C NMR (126 MHz, CDCl3)** δ 165.68, 156.00, 152.71, 148.20, 147.54, 142.98, 140.13, 131.60, 130.43, 130.12, 129.64, 128.73, 120.13, 119.52, 115.15, 114.38, 112.46, 102.34, 59.91, 59.71, 59.50, 56.47, 56.35, 21.77, 17.62, 17.57, 13.16. **19F NMR (471 MHz, CDCl3)** δ -119.41, -119.42, -119.45, -119.47, -119.48, -122.13, -122.16, -123.35, -123.39, -123.45, -123.46, -123.48, -129.43, -129.44, -129.46, -129.47, -129.50, -136.98, -137.00, -137.01, -137.01, -137.02, -137.03. **HRMS (ESI)**: Calculated mass for C38H38F12NO5Si [M+H]+: 844.2328.; observed mass: 844.2327.

**4'-((Diisopropyl(4-(3-oxobut-1-en-1-yl)benzyl)silyl)oxy)-4,5-dimethoxy-[1,1'-biphenyl]-2-carbonitrile (87):**4

**Physical appearance**: Colorless gummy.

**Column material**:100-200 mesh silica

**Eluent**: petroleum ether/ethyl acetate (80/20, v/v).

**Yield**: 65%

**1H NMR (400 MHz, CDCl3) δ** 7.94 – 7.92 (m, 2H), 7.61 (dd, *J* = 16.2, 11.3 Hz, 2H), 7.53 (t, *J* = 7.4 Hz, 2H), 7.36 (dd, *J* = 16.6, 8.4 Hz, 4H), 7.13 (t, *J* = 4.0 Hz, 3H), 6.87 – 6.84 (m, 3H), 6.78 (d, *J* = 15.4 Hz, 1H), 3.95 (s, 3H), 3.93 (s, 3H), 2.42 (s, 2H), 1.25 – 1.17 (m, 2H), 1.03 (d, *J* = 7.3 Hz, 12H). **13C NMR (126 MHz, CDCl3)** δ 155.92, 152.71, 148.20, 143.33, 142.81, 141.19, 140.07, 133.38, 131.60, 130.10, 129.67, 129.44, 128.90, 128.86, 127.74, 125.70, 120.07, 119.47, 115.16, 112.46, 102.29, 56.46, 56.34, 21.77, 17.59, 17.53, 13.12.

**4'-((Diisopropyl(4-(3-oxobut-1-en-1-yl)benzyl)silyl)oxy)-4,5-dimethoxy-[1,1'-biphenyl]-2-carbonitrile (88):**

**Physical appearance**: Colorless oil.

**Column material:** 100-200 mesh silica

**Eluent**: petroleum ether/ethyl acetate (87/13, v/v).

**Yield**: 62%

**1H NMR (400 MHz, CDCl3)** δ 7.47 (d, *J* = 16.2 Hz, 1H), 7.39 (dd, *J* = 11.8, 5.2 Hz, 4H), 7.16 - 7.13 (m, 3H), 6.89 (s, 1H), 6.86 (d, *J* = 8.5 Hz, 2H), 6.66 (d, *J* = 16.2 Hz, 1H), 3.96 (s, 3H), 3.93 (s, 3H), 2.43 (s, 2H), 2.36 (s, 3H), 1.22 (dd, *J* = 14.7, 7.3 Hz, 2H), 1.05 (dd, *J* = 7.4, 1.8 Hz, 12H). **13C NMR (101 MHz, CDCl3)** δ 198.84, 156.03, 152.72, 148.20, 143.92, 142.45, 140.14, 131.56, 130.94, 130.10, 129.64, 128.63, 126.05, 120.14, 119.53, 115.16, 112.49, 102.32, 56.48, 56.36, 27.61, 21.70, 17.63, 17.58, 13.15. **HRMS (ESI)**: Calculated mass for C32H38NO4Si [M+H]+: 528.2570.; observed mass: 528.2569.

**Dimethyl2-(4-((((2'-cyano-4',5'-dimethoxy-[1,1'-biphenyl]-4-yl)oxy)diisopropylsilyl)methyl)-2-fluorophenyl)maleate (89):**

**Physical appearance**: Colorless oil.

**Column material:** 100-200 mesh silica

**Eluent**: petroleum ether/ethyl acetate (85/15, v/v).

**Yield**: 68%

**1H NMR (500 MHz, CDCl3)** δ 7.54 – 7.53 (m, 2H), 7.39 (s, 1H), 7.20 – 7.16 (m, 2H), 7.06 (dd, *J* = 7.9, 1.6 Hz, 1H), 7.03 - 6.97 (m, 4H), 4.09 (s, 3H), 4.06 (s, 3H), 3.92 (s, 3H), 3.74 (s, 3H), 2.55 (s, 2H), 1.39 (dd, *J* = 4.5, 2.9 Hz, 2H), 1.19 (dd, *J* = 7.4, 2.6 Hz, 12H). **13C NMR (126 MHz, CDCl3)** δ 166.42, 165.35, 160.72, 158.75, 155.98, 152.71, 148.19, 142.73, 142.67, 140.19, 138.84, 131.62, 130.77, 130.74, 130.35, 130.16, 124.31, 120.19, 119.48, 118.18, 118.05, 115.73, 115.55, 115.17, 112.55, 102.33, 56.48, 56.35, 53.19, 52.07, 21.37, 17.61, 17.54, 13.12. **HRMS (ESI)**: Calculated mass for C34H39FNO7Si [M+H]+: 620.2480.; observed mass: 620.2480.

**Dimethyl 2-(4-((((2'-cyano-4',5'-dimethoxy-[1,1'-biphenyl]-4-yl)oxy)diisopropylsilyl)methyl)-2-fluoro-5-methylphenyl)maleate (90):**

**Physical appearance**: Colorless gummy.

**Column material:** 100-200 mesh silica

**Eluent**: petroleum ether/ethyl acetate (80/20, v/v).

**Yield**: 81%

**1H NMR (500 MHz, CDCl3)** δ 7.36 (d, *J* = 8.6 Hz, 2H), 7.12 (s, 1H), 7.06 (s, 1H), 6.92 (d, *J* = 7.6 Hz, 1H), 6.88 (t, *J* = 5.5 Hz, 2H), 6.74 – 6.73 (m, 2H), 3.94 (s, 3H), 3.92 (s, 3H), 3.79 (s, 3H), 3.61 (s, 3H), 2.36 (s, 2H), 2.25 (s, 3H), 1.29 (dd, *J* = 8.6, 6.4 Hz, 2H), 1.10 (d, *J* = 7.5 Hz, 6H), 1.04 (d, *J* = 7.4 Hz, 6H). **13C NMR (126 MHz, CDCl3)** δ 166.56, 165.39, 159.00, 157.05, 155.80, 152.66, 148.12, 141.14, 141.08, 140.23, 138.86, 132.17, 132.14, 131.48, 130.98, 130.95, 130.11, 120.04, 119.47, 117.94, 117.81, 115.66, 115.49, 115.12, 112.50, 102.27, 56.46, 56.33, 53.19, 52.06, 19.87, 18.76, 17.74, 17.50, 13.34. **HRMS (ESI)**: Calculated mass for C35H41FNO7Si [M+H]+: 634.2636.; observed mass: 634.2634.

**Ethyl (*E*)-3-(4-((((2'-cyano-4',5'-dimethoxy-[1,1'-biphenyl]-4-yl)oxy)diisopropylsilyl)methyl)-2,5-difluorophenyl)acrylate (91):**4

**Physical appearance**: Colorless oil.

**Column material**:100-200 mesh silica

**Eluent**: petroleum ether/ethyl acetate (80/20, v/v).

**Yield**: 75%

**1H NMR (400 MHz, CDCl3)** δ 7.69 (d, *J* = 16.2 Hz, 1H), 7.40 (d, *J* = 8.5 Hz, 2H), 7.13 (s, 2H), 6.89 – 6.86 (m, 4H), 6.42 (d, *J* = 16.1 Hz, 1H), 4.25 (q, *J* = 7.1 Hz, 2H), 3.96 (s, 3H), 3.93 (s, 3H) 2.37 (s, 2H), 1.32 (t, *J* = 7.1 Hz, 3H), 1.26 (dd, *J* = 14.9, 7.4 Hz, 2H), 1.07 (d, *J* = 2.7 Hz, 6H), 1.05 (d, *J* = 2.8 Hz, 6H). **13C NMR (101 MHz, CDCl3)** δ 166.91, 158.44, 157.73, 155.96, 155.75, 155.35, 152.71, 148.19, 140.06, 136.43, 131.73, 131.25, 131.16, 131.05, 130.97, 130.15, 120.53, 120.47, 120.00, 119.50, 118.13, 118.08, 117.89, 117.84, 115.15, 114.45, 114.41, 114.19, 114.15, 112.49, 102.31, 60.85, 56.48, 56.36, 17.48, 17.41, 14.50, 13.40.

**Methyl (*E*)-3-(2,3-dichloro-4-((((2'-cyano-4',5'-dimethoxy-[1,1'-biphenyl]-4-yl)oxy)diisopropylsilyl)methyl)phenyl)acrylate (92):**

**Physical appearance**: Colorless gummy.

**Column material:** 100-200 mesh silica

**Eluent**: petroleum ether/ethyl acetate (85/15, v/v).

**Yield**: 81%

**1H NMR (500 MHz, CDCl3)** δ 7.72 (d, *J* = 16.4 Hz, 1H), 7.41 (d, *J* = 8.5 Hz, 2H), 7.12 (s, 1H), 6.89 – 6.86 (m, 3H), 6.66 (dd, *J* = 18.9, 13.3 Hz, 3H), 3.95 (s, 3H), 3.92 (s, 3H), 3.78 (s, 3H), 2.38 (s, 2H), 1.24 (d, *J* = 7.2 Hz, 2H), 1.06 (d, *J* = 7.4 Hz, 6H), 1.05 (d, *J* = 7.4 Hz, 6H). **13C NMR (126 MHz, CDCl3)** δ 167.73, 162.65, 160.56, 155.64, 152.68, 148.17, 144.79, 139.92, 131.83, 131.39, 130.17, 122.26, 122.19, 119.97, 119.42, 115.09, 112.43, 112.34, 112.14, 108.74, 102.24, 56.40, 56.29, 51.90, 22.02, 17.54, 17.47, 13.14. **HRMS (ESI)**: Calculated mass for C32H36Cl2NO5Si [M+H]+: 612.1740.; observed mass: 612.1740.

**Methyl (*E*)-3-(4-((((2'-cyano-4',5'-dimethoxy-[1,1'-biphenyl]-4-yl)oxy)diisopropylsilyl)methyl)-3-fluoro-5-methoxyphenyl)acrylate (93):**

**Physical appearance**: Colorless liquid.

**Column material:** 100-200 mesh silica

**Eluent**: petroleum ether/ethyl acetate (80/20, v/v).

**Yield**: 79%

**1H NMR (500 MHz, CDCl3)** δ 7.78 (d, *J* = 16.1 Hz, 1H), 7.34 (d, *J* = 8.4 Hz, 2H), 7.28 (d, *J* = 5.4 Hz, 1H), 7.15 (s, 1H), 6.89 (s, 1H), 6.79 (d, *J* = 8.4 Hz, 2H), 6.60 (d, *J* = 8.6 Hz, 1H), 6.43 (d, *J* = 16.1 Hz, 1H), 3.98 (s, 3H), 3.95 (s, 3H), 3.81 (s, 3H), 3.76 (s, 3H), 2.38 (s, 2H), 1.25 (d, *J* = 11.4 Hz, 2H), 1.10 (dd, *J* = 6.9, 4.6 Hz, 12H). **13C NMR (101 MHz, CDCl3)** δ 168.05, 160.86, 159.75, 159.66, 158.38, 156.15, 152.67, 148.08, 140.29, 138.61, 130.97, 129.79, 125.96, 125.91, 119.80, 119.59, 117.38, 117.31, 116.02, 115.82, 115.42, 115.28, 115.13, 112.48, 106.19, 102.17, 56.45, 56.33, 55.76, 51.79, 17.44, 17.40, 13.84, 7.58, 7.54. **HRMS (ESI)**: Calculated mass for C33H39FNO6Si [M+H]+: 592.2531.; observed mass: 592.2530.

**4'-(((2,6-Difluoro-4-(2-(phenylsulfonyl)vinyl)benzyl)diisopropylsilyl)oxy)-4,5-dimethoxy-[1,1'-biphenyl]-2-carbonitrile (94):**

**Physical appearance**: Colorless gummy.

**Column material:** 100-200 mesh silica

**Eluent**: petroleum ether/ethyl acetate (80/20, v/v).

**Yield**: 70%

**1H NMR (500 MHz, CDCl3)** δ 7.92 (d, *J* = 7.4 Hz, 2H), 7.69 (d, *J* = 15.6 Hz, 1H), 7.59 (t, *J* = 7.4 Hz, 1H), 7.52 (t, *J* = 7.6 Hz, 2H), 7.30 (d, *J* = 8.5 Hz, 2H), 7.20 (dd, *J* = 14.6, 8.2 Hz, 1H), 7.12 (s, 1H), 6.91 (d, *J* = 15.6 Hz, 1H), 6.87 – 6.83 (m, 2H), 6.76 (d, *J* = 8.5 Hz, 2H), 3.96 (s, 3H), 3.92 (s, 3H), 2.33 (s, 2H), 1.29 (d, *J* = 7.4 Hz, 2H), 1.08 (dd, *J* = 7.4, 2.1 Hz, 12H). **13C NMR (101 MHz, CDCl3)** δ 163.48, 161.55, 161.47, 160.86, 155.65, 152.70, 148.13, 140.69, 140.06, 135.36, 133.58, 131.37, 129.94, 129.51, 129.42, 129.20, 129.13, 127.86, 127.84, 126.81, 126.75, 119.63, 119.47, 116.82, 116.61, 115.16, 112.50, 112.02, 111.75, 102.14, 56.44, 56.37, 17.35, 17.29, 13.71, 13.63, 7.19. **HRMS (ESI)**: Calculated mass for C36H38F2NO5SSi [M+H]+: 662.2208.; observed mass: 662.2206.

**2.25. Characterization data of phenol natural products:**

**(*E*)-3-(3,4-Dihydroxyphenyl)acrylic acid (95):**

**Physical appearance:** Colorless oil.

**Column material:** 100-200 mesh silica

**Eluent**: petroleum ether/ethyl acetate (70/30, v/v).

**Yield:** 84%

**Step 1**: Following the general procedure of non-directed olefination, **A2** was prepared from Guaiacol.

**Step 2**: A round bottom flask with a magnetic stir-bar, was charged with A (1 mmoL) and dissolved in dry DCM in presence of N2 atmosphere. After that the reaction mixture was stirred for 10 min and BBr3 (4mmoL, 4 equiv.). was added and the reaction mixture was stirred for overnight at room temperature until TLC indicated the completion of hydrolysis. The resulting residue was quenched with saturated NaHCO3 solution (10 mL) and DCM (10 mL). The combined organic extract with DCM and dried over anhydrous Na2SO4 and concentrated in vacuo to provide pure product.

**1H NMR (500 MHz, DMSO-d6)** δ 12.14 (s, 1H), 9.54 (s, 1H), 9.14 (s, 1H), 7.41 (d, *J* = 15.9 Hz, 1H), 7.02 (s, 1H), 6.96 (dd, *J* = 8.2, 1.4 Hz, 1H), 6.75 (d, *J* = 8.1 Hz, 1H), 6.17 (d, *J* = 15.9 Hz, 1H). **13C NMR (126 MHz, DMSO-d6)** δ 167.96, 148.17, 145.59, 144.65, 125.72, 121.21, 115.77, 115.13, 114.66. **HRMS (ESI)**: Calculated mass for C9H7O4Na [M+Na]+: 202.0242; observed mass: 202.0238.

**(*E*)-3-(4-Hydroxy-3-methoxyphenyl)acrylic acid (96):**7

**Physical appearance:** Sticky oil.

**Column material:** 100-200 mesh silica

**Eluent**: petroleum ether/ethyl acetate (80/20, v/v).

**Yield:** 81%

**Step 1**: Following the general procedure of non-directed olefination, **A3** was prepared from Guaiacol.

**Step 2**: A round bottom flask with a magnetic stir-bar, was charged with A (1 mmoL) and LiOH.H2O (3 mmol, 3 equiv.). MeOH (4 mL), THF (2 mL) and H2O (1 mL) were added and the reaction mixture was stirred for 18 h at room temperature until TLC indicated the completion of hydrolysis. The MeOH and THF were removed and the resulting residue was diluted with H2O (10 mL) and EtOAc (15 mL). After acidification with 6 M HCl (5 mL), the solution was extracted with EtOAc (15 mL x 3). The combined organic extract was washed with brine, dried over anhydrous Na2SO4 and concentrated in vacuo to provide pure hydrolyzed product.

**1H NMR (500 MHz, CD3CN)** δ 7.59 (d, *J* = 15.9 Hz, 1H), 7.22 (d, *J* = 1.9 Hz, 1H), 7.10 (dd, *J* = 8.2, 1.9 Hz, 1H), 6.94 (s, 1H), 6.84 (d, *J* = 8.2 Hz, 1H), 6.34 (d, *J* = 15.9 Hz, 1H), 3.89 (s, 3H). **13C NMR (126 MHz, CD3CN)** δ 168.85, 150.08, 148.96, 146.70, 128.11, 124.42, 116.29, 116.19, 111.93, 57.16.

**(*E*)-3-(4-Hydroxyphenyl)acrylic acid (97):**7

**Physical appearance:** Colorless oil.

**Column material:** 100-200 mesh silica

**Eluent**: petroleum ether/ethyl acetate (85/15, v/v).

**Yield:** 97%

**Step 1**: Following the general procedure of non-directed olefination, **A4** was prepared from Phenol.

**Step 2**: A round bottom flask with a magnetic stir-bar, was charged with A (1 mmoL) and LiOH.H2O (3 mmol, 3 equiv.). MeOH (4 mL), THF (2 mL) and H2O (1 mL) were added and the reaction mixture was stirred for 18 h at room temperature until TLC indicated the completion of hydrolysis. The MeOH and THF were removed and the resulting residue was diluted with H2O (10 mL) and EtOAc (15 mL). After acidification with 6 M HCl (5 mL), the solution was extracted with EtOAc (15 mL x 3). The combined organic extract was washed with brine, dried over anhydrous Na2SO4 and concentrated in vacuo to provide pure hydrolyzed product.

**1H NMR (400 MHz, MeOD-d4)** δ 7.52 (d, *J* = 15.9 Hz, 1H), 7.37 (d, *J* = 8.6 Hz, 2H), 6.73 (d, *J* = 8.6 Hz, 2H), 6.20 (d, *J* = 15.9 Hz, 1H). **13C NMR (101 MHz, MeOD-d4)** δ 170.98, 161.17, 146.65, 131.08, 127.24, 116.80, 115.60.

**1,3,3-Trimethylbicyclo[2.2.1]heptan-2-yl (*E*)-3-(4-methoxyphenyl)acrylate (98):**

**Physical appearance:** Colorless oil.

**Column material:** 100-200 mesh silica

**Eluent**: petroleum ether/ethyl acetate (80/20, v/v).

**Yield:** 70%

**Step 1**: Following the general procedure of non-directed olefination, **A5** was prepared from Phenol.

**Step 2**: The compound **A5** was further protected due to isolation problem.

**1H NMR (400 MHz, CDCl3)** δ 7.64 (d, *J* = 16.0 Hz, 1H), 7.49 (d, *J* = 8.7 Hz, 2H), 6.90 (d, *J* = 8.8 Hz, 2H), 6.35 (d, *J* = 15.9 Hz, 1H), 4.49 (d, *J* = 1.8 Hz, 1H), 3.83 (s, 3H), 1.89 – 1.81 (m, 1H), 1.77 – 1.71 (m, 2H), 1.62 (dd, *J* = 10.2, 1.6 Hz, 1H), 1.52 – 1.43 (m, 1H), 1.21 (dd, *J* = 10.3, 1.3 Hz, 1H), 1.15 (s, 3H), 1.08 (s, 3H), 0.92 (d, *J* = 49.9 Hz, 1H), 0.82 (s, 3H). **13C NMR (101 MHz, CDCl3)** δ 167.98, 161.45, 144.16, 129.88, 127.41, 116.12, 114.44, 86.21, 55.52, 48.57, 41.63, 39.86, 29.93, 26.91, 26.07, 20.37, 19.63. **HRMS (ESI)**: Calculated mass for C20H27O3 [M+H]+: 315.1960; observed mass: 315.1958.

**Propyl (*E*)-3-(3,4-dimethoxyphenyl)acrylate (99):**

**Physical appearance:** Colorless oil.

**Column material:** 100-200 mesh silica

**Eluent**: petroleum ether/ethyl acetate (90/10, v/v).

**Yield:** 67%

**Step 1**: Following the general procedure of non-directed olefination, **A7** was prepared from Guaiacol.

**Step 2**: The compound **A7** was further protected due to isolation problem.

**1H NMR (500 MHz, DMSO-d6)** δ 7.57 (d, *J* = 15.9 Hz, 1H), 7.35 (s, 1H), 7.23 (d, *J* = 8.3 Hz, 1H), 6.97 (d, *J* = 8.3 Hz, 1H), 6.55 (d, *J* = 15.9 Hz, 1H), 4.11 (t, *J* = 6.5 Hz, 2H), 3.80 (s, 3H), 3.79 (s, 3H), 1.64 – 1.60 (m, 2H), 1.34 – 1.20 (m, 14H), 0.84 (t, *J* = 5.8 Hz, 3H). **13C NMR (126 MHz, DMSO-d6)** δ 166.65, 150.98, 148.99, 144.64, 126.87, 123.04, 115.60, 111.48, 110.28, 63.82, 55.62, 55.58, 31.33, 28.97, 28.72, 28.29, 25.47, 22.13, 13.99. **HRMS (ESI)**: Calculated mass for C14H19O4 [M+H]+: 215.1283; observed mass: 215.1281.

**(1*E*,6*E*)-1,7-Bis(4-hydroxy-3-methoxyphenyl)hepta-1,6-diene-3,5-dione (100):**

**Physical appearance:** Yellow solid.

**Column material:** 100-200 mesh silica

**Eluent**: petroleum ether/ethyl acetate (85/15, v/v).

**Yield:** 67%

**Step 1**: Following the general procedure of non-directed olefination, **A8** was prepared from Guaiacol.

**Step 2**: The compound **B8** was prepared from the given reference.8

**1H NMR (500 MHz, DMSO-d6)** δ 9.68 (s, 2H), 7.54 (d, *J* = 15.8 Hz, 2H), 7.32 (s, 2H), 7.15 (d, *J* = 7.6 Hz, 2H), 6.82 (d, *J* = 8.1 Hz, 2H), 6.76 (d, *J* = 15.8 Hz, 2H), 6.06 (s, 1H), 3.83 (s, 6H). **13C NMR (126 MHz, DMSO-d6)** δ 183.25, 149.38, 148.02, 140.75, 126.36, 123.18, 121.11, 115.72, 111.32, 100.89, 55.71.

**Methyl (*E*)-3-(4-hydroxy-3-(3-methylbut-2-en-1-yl)phenyl)acrylate (101):**7

**Physical appearance:** Colorless oil.

**Column material:** 100-200 mesh silica

**Eluent**: petroleum ether/ethyl acetate (90/10, v/v).

**Yield:** 62%

**Step 1**: Following the general procedure of non-directed olefination, **A** was prepared from phenol.

**Step 2**: The compound **B** was prepared from the given reference.7

**1H NMR (500 MHz, CDCl3)** δ 7.63 (d, *J* = 16.0 Hz, 1H), 7.28 (td, *J* = 4.4, 2.1 Hz, 2H), 6.81 (d, *J* = 8.9 Hz, 1H), 6.29 (d, *J* = 16.0 Hz, 1H), 5.31 (dddd, *J* = 7.2, 5.8, 2.8, 1.4 Hz, 1H), 3.80 (s, 3H), 3.35 (d, *J* = 7.2 Hz, 2H), 1.78 (s, 3H), 1.76 (s, 3H).**13C NMR (101 MHz, CDCl3)** δ 168.39, 156.83, 145.37, 135.33, 130.30, 127.98, 127.87, 127.20, 121.38, 116.27, 114.94, 51.86, 29.53, 26.00, 18.08.

**(*E*)-3-(4-Hydroxy-3-(3-methylbut-2-en-1-yl)phenyl)acrylic acid (102):**7

**Physical appearance:** White solid.

**Column material:** 100-200 mesh silica

**Eluent**: petroleum ether/ethyl acetate (92/8, v/v).

**Yield:** 58%

**Step 1**: Following the general procedure of non-directed olefination, **A10** was prepared from phenol.

**Step 2**: The compound **B10** was prepared from the given reference.7

**1H NMR (500 MHz, CDCl3)** δ 7.71 (d, *J* = 15.9 Hz, 1H), 7.33 (d, *J* = 8.2 Hz, 2H), 6.82 (d, *J* = 8.0 Hz, 1H), 6.30 (d, *J* = 15.9 Hz, 1H), 5.32 (t, *J* = 7.1 Hz, 1H), 3.37 (d, *J* = 7.1 Hz, 2H), 1.79 (d, *J* = 5.3 Hz, 6H). **13C NMR (126 MHz, CDCl3)** δ 172.40, 157.10, 147.23, 135.80, 130.65, 128.43, 127.75, 127.15, 121.22, 116.46, 114.57, 29.75, 26.02, 18.13.

**(*E*)-3-(4-Hydroxy-3,5-bis(3-methylbut-2-en-1-yl)phenyl)acrylic acid (103):**7

**Physical appearance:** Colorless oil.

**Column material:** 100-200 mesh silica

**Eluent**: petroleum ether/ethyl acetate (95/5, v/v).

**Yield:** 56%

**Step 1**: Following the general procedure of non-directed olefination, **A10** was prepared from phenol.

**Step 2**: The compound **B10** was prepared from the given reference.7

**1H NMR (400 MHz, CDCl3)** δ 7.70 (d, *J* = 15.9 Hz, 1H), 7.20 (s, 2H), 6.29 (d, *J* = 15.9 Hz, 1H), 5.31 (dd, *J* = 7.8, 6.6 Hz, 2H), 3.35 (d, *J* = 7.2 Hz, 4H), 1.79 (d, *J* = 6.5 Hz, 12H). **13C NMR (101 MHz, CDCl3)** δ 172.84, 155.64, 147.58, 135.36, 128.61, 127.90, 126.60, 121.52, 114.34, 29.68, 26.04, 18.11.

**2.26. Characterization data of Late-Stage Functionalization of drugs:**

Following the general procedure of non-directed C-H olefination,the below performed reaction time was 48 h.

**Butyl (*E*)-3-(1,3-dimethyl-2,4-dioxo-1,2,3,4-tetrahydropyrimidin-5-yl)acrylate (104):**

**Physical appearance:** Red solid.

**Column material:** 100-200 mesh silica

**Eluent**: petroleum ether/ethyl acetate (85/15, v/v).

**Yield:** 79%

**1H NMR (500 MHz, CDCl3)** δ 7.48 (s, 1H), 7.32 (d, *J* = 16.1 Hz, 1H), 7.02 (d, *J* = 15.8 Hz, 1H), 4.19 (t, *J* = 6.7 Hz, 2H), 3.51 (s, 3H), 3.41 (s, 3H), 1.72 – 1.63 (m, 2H), 1.47 – 1.40 (m, 2H), 0.97 (t, *J* = 7.4 Hz, 3H). **13C NMR (126 MHz, CDCl3)** δ 167.92, 161.53, 150.91, 144.99, 136.43, 119.33, 109.07, 64.53, 37.68, 30.90, 28.30, 19.34, 13.90. **HRMS (ESI)**: Calculated mass for C13H19N2O4 [M+H]+: 267.1345; observed mass: 267.1344.

**Butyl (*E*)-3-(1,3,7-trimethyl-2,6-dioxo-2,3,6,7-tetrahydro-1H-purin-8-yl)acrylate (105):**

**Physical appearance:** White solid.

**Column material:** 100-200 mesh silica

**Eluent**: petroleum ether/ethyl acetate (80/20, v/v).

**Yield:** 63%

**1H NMR (500 MHz, CDCl3)** δ 7.49 (d, *J* = 15.3 Hz, 1H), 7.01 (d, *J* = 15.3 Hz, 1H), 4.23 (t, *J* = 6.7 Hz, 2H), 4.07 (s, 3H), 3.57 (s, 3H), 3.39 (s, 3H), 1.71 – 1.64 (m, 2H), 1.43 (dt, *J* = 15.0, 7.5 Hz, 2H), 0.94 – 0.89 (m, 3H). **13C NMR (126 MHz, CDCl3)** δ 166.18, 155.48, 151.70, 148.53, 146.95, 126.58, 126.56, 109.40, 65.26, 52.69, 32.04, 30.82, 30.69, 28.21, 19.31, 19.24, 13.88, 13.85. **HRMS (ESI)**: Calculated mass for C15H21N4O4 [M+H]+: 321.1563; observed mass: 321.1560.

**Ethyl (*E*)-3-((8R,9S,13S,14S)-3-methoxy-13-methyl-17-oxo-7,8,9,11,12,13,14,15,16,17-decahydro-6H-cyclopenta[a]phenanthren-2-yl)acrylate (106):**5

**Physical appearance:** Colorless oil.

**Column material:** 100-200 mesh silica

**Eluent**: petroleum ether/ethyl acetate (90/10, v/v).

**Yield:** 53%

**1H NMR (500 MHz, CDCl3)** δ 7.93 (d, *J* = 16.1 Hz, 1H), 7.42 (s, 1H), 6.63 (s, 1H), 6.50 (d, *J* = 16.1 Hz, 1H), 4.30 – 4.20 (m, 2H), 3.85 (s, 3H), 2.93 (dd, *J* = 8.7, 3.9 Hz, 2H), 2.60 – 2.49 (m, 1H), 2.43 (d, *J* = 10.8 Hz, 1H), 2.30 – 2.22 (m, 1H), 2.20 – 2.11 (m, 1H), 2.09 – 2.00 (m, 2H), 2.00 – 1.95 (m, 1H), 1.71 – 1.52 (m, 6H), 1.33 (t, *J* = 7.1 Hz, 3H), 0.91 (s, 3H). **13C NMR (101 MHz, CDCl3)** δ 220.98, 167.94, 156.69, 140.78, 140.58, 132.25, 126.44, 121.25, 118.05, 111.63, 60.48, 55.70, 50.57, 48.18, 43.94, 38.46, 36.07, 32.14, 31.71, 30.13, 29.58, 26.63, 26.09, 22.91, 21.79, 14.60, 14.35, 14.05, 1.24.

**Ethyl (*E*)-3-(1,4(1,4)-dibenzenacyclohexaphane-12-yl)acrylate (107):**5

**Physical appearance:** Colorless oil.

**Column material:** 100-200 mesh silica

**Eluent**: petroleum ether/ethyl acetate (92/8, v/v).

**Yield:** 42%

**1H NMR (400 MHz, CDCl3)** δ 7.79 (d, *J* = 15.8 Hz, 1H), 6.68 (d, *J* = 1.2 Hz, 1H), 6.62 – 6.46 (m, 5H), 6.40 (d, *J* = 7.8 Hz, 1H), 6.25 (d, *J* = 15.8 Hz, 1H), 4.37 – 4.23 (m, 2H), 3.64 – 3.51 (m, 1H), 3.20 – 2.84 (m, 7H), 1.38 (t, *J* = 7.1 Hz, 3H). **13C NMR (101 MHz, CDCl3)** δ 167.61, 142.63, 140.88, 140.49, 139.57, 139.42, 135.40, 134.86, 134.65, 133.29, 133.22, 132.01, 131.37, 130.72, 118.34, 60.70, 35.61, 35.36, 35.27, 33.93, 14.59.

**Ethyl (*E*)-3-(2-(*N*,*N*-dimethylsulfamoyl)-5-(5-(*p*-tolyl)-3-(trifluoromethyl)-1H-pyrazol-1-yl)phenyl)acrylate (108):**

**Physical appearance:** Brown solid.

**Column material:** 100-200 mesh silica

**Eluent**: petroleum ether/ethyl acetate (80/20, v/v).

**Yield: 4**8%

**1H NMR (400 MHz, CDCl3)** δ 7.97 (d, *J* = 1.9 Hz, 1H), 7.81 (dd, *J* = 8.3, 1.9 Hz, 1H), 7.57 (d, *J* = 8.3 Hz, 1H), 7.22 (d, *J* = 16.0 Hz, 1H), 7.05 (d, *J* = 8.0 Hz, 2H), 6.95 (d, *J* = 8.1 Hz, 2H), 6.81 (s, 1H), 6.15 (d, *J* = 15.9 Hz, 1H), 4.20 (q, *J* = 7.1 Hz, 2H), 2.74 (s, 6H), 2.31 (s, 3H), 1.29 (t, *J* = 7.1 Hz, 3H). **13C NMR (126 MHz, CDCl3)** δ 165.61, 147.51, 141.52, 140.07, 137.49, 137.14, 133.25, 129.90, 129.80, 129.66, 129.30, 128.56, 128.31, 127.01, 125.22, 123.60, 105.19, 61.08, 38.07, 21.47, 14.39. **HRMS (ESI)**: Calculated mass for C24H25 F3N3O4S [M+H]+: 508.1518; observed mass: 508.1513.

**Ethyl (*E*)-3-(3,5-dimethoxy-2-(2-methoxy-2-oxoethyl)phenyl)acrylate (109):**

**Physical appearance:** Colorless oil.

**Column material:** 100-200 mesh silica

**Eluent**: petroleum ether/ethyl acetate (92/8, v/v).

**Yield:** 70%

Following the general procedure of non-directed C-H olefination, the reaction time was 48 h with ligand L4. **1H NMR (400 MHz, CDCl3)** δ 7.87 (d, *J* = 15.7 Hz, 1H), 7.08 (d, *J* = 9.6 Hz, 1H), 6.73 (s, 1H), 6.27 (d, *J* = 15.6 Hz, 1H), 4.24 (q, *J* = 7.1 Hz, 2H), 3.88 (s, 6H), 3.71 (d, *J* = 8.4 Hz, 2H), 3.67 (s, 3H), 1.31 (t, *J* = 7.1 Hz, 3H). **13C NMR (101 MHz, CDCl3)** δ 171.70, 167.17, 150.93, 148.62, 141.31, 127.41, 126.26, 118.02, 113.65, 109.04, 60.58, 56.11, 56.07, 52.35, 38.17, 14.47. **HRMS (ESI)**: Calculated mass for C16H21O6 [M+H]+: 309.1338; observed mass: 309.1335.

**Ethyl (*E*)-3-(2-(1-methoxy-1-oxopropan-2-yl)-5-(1-oxoisoindolin-2-yl)phenyl)acrylate (110):**

**Physical appearance:** Greenish oil.

**Column material:** 100-200 mesh silica

**Eluent**: petroleum ether/ethyl acetate (92/8, v/v).

**Yield:** 50%

Following the general procedure of non-directed C-H olefination, the reaction time was 48 h with ligand L4. **1H NMR (400 MHz, CDCl3)** δ 8.14 (d, *J* = 2.4 Hz, 1H), 8.09 – 8.02 (m, 1H), 7.92 (d, *J* = 7.1 Hz, 1H), 7.83 (dd, *J* = 8.6, 2.4 Hz, 1H), 7.62 (t, *J* = 7.4 Hz, 1H), 7.53 (d, *J* = 7.5 Hz, 2H), 7.39 (d, *J* = 8.6 Hz, 1H), 6.46 (d, *J* = 15.7 Hz, 1H), 4.87 (s, 2H), 4.27 (t, *J* = 7.1 Hz, 2H), 4.12 (q, *J* = 7.1 Hz, 1H), 3.67 (s, 3H), 1.50 (d, *J* = 7.1 Hz, 3H), 1.35 (t, *J* = 7.1 Hz, 3H). **13C NMR (101 MHz, CDCl3)** δ 174.82, 167.86, 166.86, 141.59, 140.17, 138.92, 136.12, 134.32, 133.13, 132.55, 128.77, 128.43, 124.44, 122.90, 122.15, 121.20, 117.96, 60.89, 52.43, 50.82, 40.88, 18.73, 14.52. **HRMS (ESI)**: Calculated mass for C23H24NO5 [M+H]+: 394.1654; observed mass: 394.1650.

**Ethyl (*E*)-3-(2'-fluoro-4'-(1-methoxy-1-oxopropan-2-yl)-[1,1'-biphenyl]-3-yl)acrylate (111):**

**Physical appearance:** Colorless oil.

**Column material:** 100-200 mesh silica

**Eluent**: petroleum ether/ethyl acetate (93/7, v/v).

**Yield:** 62%

Following the general procedure of non-directed C-H olefination, the reaction time was 48 h with ligand L4. **1H NMR (400 MHz, CDCl3)** δ 8.02 (d, *J* = 15.7 Hz, 1H), 7.63 (d, *J* = 7.9 Hz, 1H), 7.52 (t, *J* = 7.5 Hz, 3H), 7.45 (t, *J* = 7.3 Hz, 2H), 7.15 (d, *J* = 11.5 Hz, 1H), 6.36 (d, *J* = 15.7 Hz, 1H), 4.30 – 4.24 (m, 2H), 4.15 – 4.10 (m, 1H), 3.71 (s, 3H), 1.53 (dd, *J* = 7.1, 2.8 Hz, 3H), 1.34 (td, *J* = 7.1, 2.1 Hz, 3H). **13C NMR (101 MHz, CDCl3)** δ 174.29, 166.80, 141.43, 141.35, 140.71, 135.72, 134.98, 131.64, 129.94, 129.90, 129.26, 129.11, 129.09, 128.79, 128.69, 128.29, 128.13, 126.28, 123.19, 121.39, 115.52, 115.28, 60.90, 52.58, 41.12, 18.66, 14.51. **HRMS (ESI)**: Calculated mass for C21H22FO4 [M+H]+: 357.1502; observed mass: 357.1500.

**Ethyl (*E*)-3-(4-benzoyl-2-(1-methoxy-1-oxopropan-2-yl)phenyl)acrylate (112):**

**Physical appearance:** Colorless oil.

**Column material:** 100-200 mesh silica

**Eluent**: petroleum ether/ethyl acetate (94/6, v/v).

**Yield:** 56%

Following the general procedure of non-directed C-H olefination, the reaction time was 48 h with ligand L4. **1H NMR (400 MHz, CDCl3)** δ 8.07 (dd, *J* = 15.7, 4.9 Hz, 1H), 7.82 – 7.75 (m, 3H), 7.70 (dd, *J* = 16.5, 8.3 Hz, 2H), 7.62 (dd, *J* = 15.2, 7.7 Hz, 1H), 7.49 (t, *J* = 7.6 Hz, 2H), 6.44 (d, *J* = 15.7 Hz, 1H), 4.35 – 4.26 (m, 2H), 4.16 (dd, *J* = 13.8, 6.8 Hz, 1H), 3.68 (s, 3H), 1.52 (d, *J* = 7.1 Hz, 3H), 1.36 (t, *J* = 7.1 Hz, 3H). **13C NMR (101 MHz, CDCl3)** δ 195.95, 174.29, 166.53, 140.89, 140.20, 138.95, 137.44, 132.96, 131.71, 130.27, 129.50, 129.16, 128.61, 128.53, 127.43, 123.41, 61.08, 52.54, 41.54, 18.55, 14.51. **HRMS (ESI)**: Calculated mass for C16H21O6 [M+H]+: 367.1545; observed mass: 367.1540.

**Ethyl (*E*)-3-(5-isobutyl-2-(1-methoxy-1-oxopropan-2-yl)phenyl)acrylate (113):**

**Physical appearance:** White solid.

**Column material:** 100-200 mesh silica

**Eluent**: petroleum ether/ethyl acetate (95/5, v/v).

**Yield:** 52%

Following the general procedure of non-directed C-H olefination, the reaction time was 48 h with ligand L4. **1H NMR (400 MHz, CDCl3)** δ 8.05 (dd, *J* = 15.7, 3.4 Hz, 1H), 7.31 (s, 1H), 7.22 (d, *J* = 8.0 Hz, 1H), 7.14 (d, *J* = 8.0 Hz, 1H), 6.35 (d, *J* = 15.7 Hz, 1H), 4.27 (q, *J* = 7.1 Hz, 2H), 4.09 (q, *J* = 7.0 Hz, 1H), 3.66 (s, 3H), 2.45 (d, *J* = 7.1 Hz, 2H), 1.85 (dt, *J* = 13.5, 6.7 Hz, 1H), 1.47 (d, *J* = 7.1 Hz, 3H), 1.34 (t, *J* = 7.1 Hz, 3H), 0.91 (d, *J* = 6.6 Hz, 6H). **13C NMR (101 MHz, CDCl3)** δ 175.07, 167.05, 142.24, 141.05, 137.57, 133.06, 131.45, 127.94, 127.26, 120.97, 120.52, 60.77, 52.33, 45.15, 40.98, 30.30, 22.57, 18.84, 14.54. **HRMS (ESI)**: Calculated mass for C19H27O4 [M+H]+: 319.1909; observed mass: 319.1905.

**Methyl (*E*)-4-(3'-(3-ethoxy-3-oxoprop-1-en-1-yl)-[1,1'-biphenyl]-4-yl)-4-oxobutanoate (114):**

**Physical appearance:** Sticky oil.

**Column material:** 100-200 mesh silica

**Eluent**: petroleum ether/ethyl acetate (92/8, v/v).

**Yield:** 38%

Following the general procedure of non-directed C-H olefination, the reaction time was 48 h with ligand L4. **1H NMR (500 MHz, CDCl3)** δ 8.08 (d, *J* = 8.4 Hz, 2H), 7.78 – 7.74 (m, 2H), 7.69 (d, *J* = 8.4 Hz, 2H), 7.64 (d, *J* = 7.5 Hz, 1H), 7.57 (d, *J* = 7.5 Hz, 1H), 7.50 (t, *J* = 7.7 Hz, 1H), 6.52 (d, *J* = 16.0 Hz, 1H), 4.28 (q, *J* = 7.1 Hz, 2H), 3.72 (s, 3H), 3.36 (t, *J* = 7.1 Hz, 2H), 2.80 (t, *J* = 8.2, 5.0 Hz, 2H), 1.35 (t, *J* = 7.1 Hz, 3H). **13C NMR (126 MHz, CDCl3)** δ 197.81, 173.59, 167.04, 145.33, 144.32, 140.88, 135.86, 135.48, 129.76, 129.25, 128.96, 127.87, 127.54, 127.16, 119.33, 60.84, 52.08, 33.71, 28.29, 14.54. **HRMS (ESI)**: Calculated mass for C22H23O5 [M+H]+: 367.1545; observed mass: 367.1542.

**Ethyl (*E*)-3-((4a*R*,4a1*R*,5a*S*,8a*R*,8a1*S*,15a*S*)-14-oxo-2,4a,4a1,5,5a,7,8,8a1,15,15a-decahydro-14H-4,6-methanoindolo[3,2,1-ij]oxepino[2,3,4-de]pyrrolo[2,3-h]quinolin-10-yl)acrylate (115):**

**Physical appearance:** Light green solid.

**Column material:** 100-200 mesh silica

**Eluent**: petroleum ether/ethyl acetate (10/90, v/v).

**Yield:** 55%

**1H NMR (400 MHz, CDCl3)** δ 8.49 (s, 1H), 8.39 (d, *J* = 7.7 Hz, 1H), 7.61 (d, *J* = 16.7 Hz, 2H), 7.48 (t, *J* = 8.8 Hz, 1H), 6.40 (d, *J* = 16.0 Hz, 1H), 4.72 (d, *J* = 11.6 Hz, 1H), 4.26 – 4.16 (m, 2H), 4.13 – 4.00 (m, 2H), 3.36 (d, *J* = 13.8 Hz, 2H), 3.19 (dt, *J* = 17.7, 8.7 Hz, 2H), 2.73 – 2.50 (m, 3H), 2.31 – 2.10 (m, 3H), 1.71 (t, *J* = 13.7 Hz, 1H), 1.47 – 1.38 (m, 1H), 1.32 – 1.27 (m, 3H), 0.86 (t, *J* = 6.8 Hz, 2H). **13C NMR (101 MHz, CDCl3)** δ 168.99, 167.05, 163.20, 148.97, 143.52, 143.30, 140.09, 138.81, 135.64, 133.17, 132.35, 131.76, 130.92, 129.86, 127.88, 124.80, 123.64, 122.11, 120.15, 118.05, 116.87, 64.36, 61.13, 60.69, 59.83, 52.42, 51.98, 51.84, 50.54, 47.35, 42.36, 41.35, 35.14, 32.09, 31.67, 30.91, 30.30, 29.85, 29.52, 25.68, 22.85, 14.44, 14.28. **HRMS (ESI)**: Calculated mass for C26H29N2O4 [M+H]+: 433.2127; observed mass: 433.2124.

**2.27. Procedure for the preparation of [Pd3(L10)6] complex:**

**General procedure:** To a solution of Pd(OAc)2 (112.25 mg, 0.5 mmol) in DCM (3.0 mL), the solution of **L10** (154.12 mg, 1.0 mmol, 2.0 equiv.) in DCM (7.0 mL) was added dropwise with stirring and the mixture was stirred at room temperature overnight. After that the supernatant was filtered and the solution was concentrated under vacuum to afford an orange crystalline solid (67% yield). The crystal was grown in acetonitrile/diethyl ether and dimethyl sulfoxide/1,2-dicloromethane, and the structure were determined by X-ray diffraction.

The complex shown similar reactivity with the standard conditions.

**3. Mechanistic Studies:**

**3.1. Control experiments:**

**3.1.A.** Following the general procedure for non-directed C-H olefination,the above stated control experiment was performed without photocatalyst in presence of four 23 W house hold CFL bulbs with stirring at room temperature for 28 h.

**3.1.B.** Following the general procedure for non-directed C-H olefination,the above stated control experiment was performed in absence of CFL bulbs (dark condition) with stirring at room temperature for 28 h.

**3.1.C.** Following the general procedure for non-directed C-H olefination,the above stated control experiment was performed with degas solvents and liquid substrates in presence of four 23 W house hold CFL bulbs with stirring at room temperature for 28 h.

**3.1.D.** Following the general procedure for non-directed C-H olefination,the above stated control experiment was performed with degas solvents and liquid substrates as well as with stoichiometric photocatalyst in presence of four 23 W house hold CFL bulbs with stirring at room temperature for 28 h.

**3.2. Role of visible light in activation:**

In an oven-dried screw capped reaction tube was charged with magnetic stir-bar, corresponding sulphonic ester (0.1 mmol), Pd(OAc)2 (10 mol%), CBz-Gly-OH (20 mol%), Eosin Y (3 mol%), in 1 mL of 1,1,1,3,3,3-Hexafluoro-2-propanol (HFIP) were added. The reaction tube was capped and placed 5 cm away from four 23 W house hold CFL bulbs with stirring (1500 rpm) at room temperature for 28h. The temperature was maintained at approximately (30-35 oC) through cooling with a fan. Upon completion the mixture was diluted with ethyl acetate and filtered through a celite pad. The filtrate was evaporation under reduced pressure and the crude mixture was purified by column chromatography using silica (100-200 mesh size) and petroleum ether/ ethyl acetate as the eluent. The similar reaction when performed in dark condition (absence of light) does not give such *meta*-*meta* coupled product.

**Bis(2-cyano-5-methoxyphenyl) [1,1'-biphenyl]-3,3'-diyldimethanesulfonate (116):**

**Physical appearance:** Light red solid.

**Column material:** 100-200 mesh silica

**Eluent**: petroleum ether/ethyl acetate (85/15, v/v).

**Yield:** 37%

**1H NMR (400 MHz, CDCl3)** δ 7.66 (s, 2H), 7.57 (d, *J* = 8.1 Hz, 2H), 7.46 (d, *J* = 7.7 Hz, 2H), 7.31 (t, *J* = 8.4 Hz, 4H), 7.13 (dt, *J* = 9.0, 2.9 Hz, 4H), 4.65 (s, 4H), 3.84 (s, 6H). **13C NMR (101 MHz, CDCl3)** δ 158.30, 143.46, 134.09, 132.95, 130.79, 129.90, 128.78, 125.10, 123.16, 120.64, 117.99, 115.19, 108.21, 57.70, 56.29. **HRMS (ESI)**: Calculated mass for C30H25N2O8S2 [M+H]+: 605.1052; observed mass: 605.1051.

**3.3. Radical Inhibitor:**

In an oven-dried screw capped reaction tube was charged with magnetic stir-bar, corresponding arene (0.1 mmol), Pd(OAc)2 (10 mol%), Ligand (20 mol%), fluorescein (3 mol%), Radical inhibitor (0.6 mmol) and olefin (0.2 mmol) in 1 mL of 1,1,1,3,3,3-hexafluoro-2-propanol (HFIP) were added. The reaction tube was capped and placed 5 cm away from four 23 W house hold CFL bulbs with stirring (1500 rpm) at room temperature for 28 h. The temperature was maintained at approximately (30-35 oC) through cooling with a fan. Upon completion the mixture was diluted with ethyl acetate and filtered through a celite pad. The filtrate was evaporated under reduced pressure and the yield was monitored using 1H NMR signal in presence of 1,3,5-trimethoxybenzene as internal standard and there is no effect on product yield. It can be concluded that the reaction is not following radical pathway.

**3.4. KIE Experiments:**

**A. Non-directed C-H olefination:**

Following the general procedure for non-directed C-H olefination, the reaction mixture was monitored for 10 to 35 min. After immediately cooling in a dry ice/alcohol bath, the yield of product was determined by crude 1H NMR using TMB (Trimethoxy benzene) as the internal standard. The obtained average yields were plotted as yield [product] vs. time t (Figure S1).

**Benzene-d6**

**Benzene**

**Figure S2:** The reaction of benzene and deuterated-benzene with ethyl acrylate.

The KIE data shown that the C–H cleavage step is the rate-determined step for the olefination of simple benzene [ *KH*/*KD* = 3.55].

**B. *Para*-C-H olefination:**

Following the general procedure for *para*-C-H olefination, the reaction mixture was monitored for 10 to 35 min. After immediately cooling in a dry ice/alcohol bath, the yield of product was determined by crude 1H NMR using TMB (Trimethoxy benzene) as the internal standard. The obtained average yields were plotted as yield [product] vs. time t (Figure S2).

**Non-deuterated-substrate**

**Deuterated-substrate**

**Figure S3:** The reaction of non-deuterated and deuterated substrate with ethyl acrylate.

The KIE data shown that the C–H cleavage step is the rate-determined step for the *para* olefination [ *KH*/*KD* = 2.36].

**3.5. On/Off experiment:**

According to the general procedure for non-directed C-H olefination, a reaction containing TMB (Trimethoxy-benzene) as internal standard was set up and placed in presence of four 23 W house hold CFL bulbs with stirring (1500 rpm) at room temperature for 28 h. The reaction was sequentially stirred under visible light irradiation and in the absence of light. Every two hours an aliquot of 50 μL was removed via syringe and analyzed by 1H NMR spectroscopy. After a total of 16 h the determined yields were plotted against the reaction time.

**Figure S4:** Effect of visible light irradiation

**3.6. UV-visible Absorption experiment**

UV/vis absorption spectra were recorded on Agilent Cary 8454 UV-Vis spectrophotometer, equipped with a temperature control unit at 25 °C. The samples were measured in quartz cuvettes (chamber volume = 3.0 mL fitted with a stopper. Following the general procedure for non-directed C-H olefination, the UV-visible absorption of the reaction mixture with substrates *O*-xylene, ligand, Pd(OAc)2, Eosin Y, without the olefin partner was determined at an interval of 5 min for 12 h at the standard reaction concentration (0.2 M) in HFIP as a solvent.


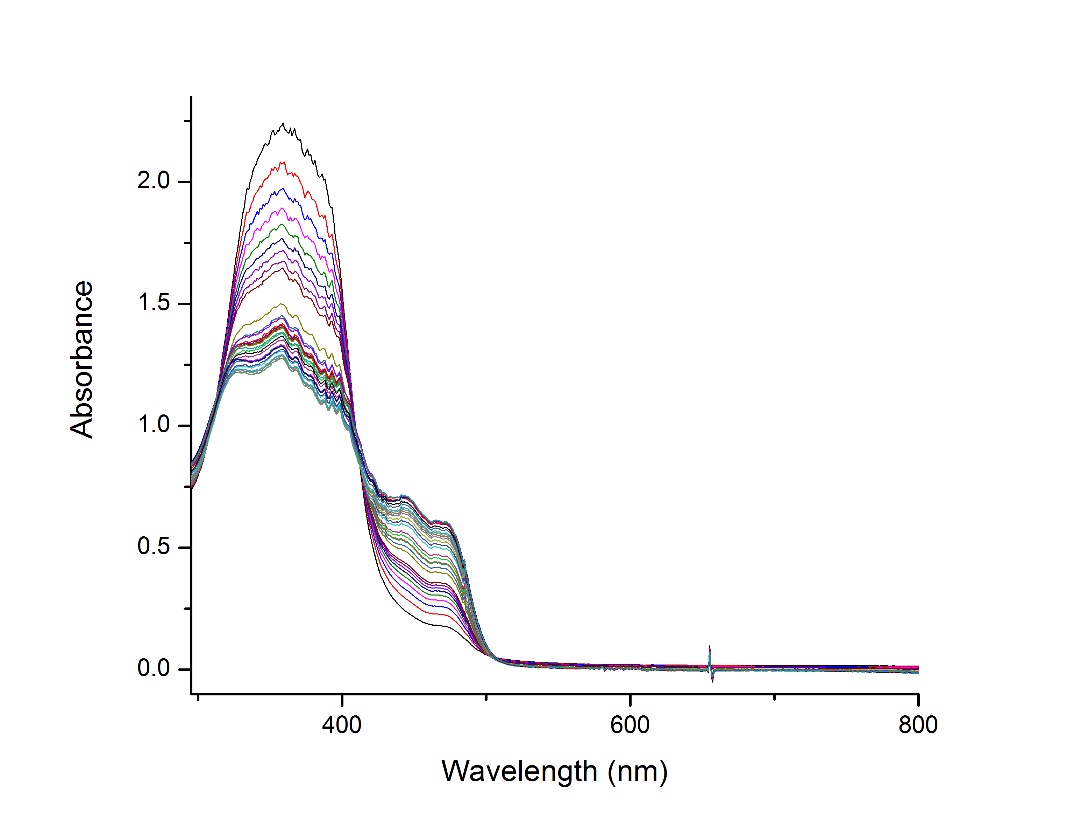


**Figure S5:** UV-visible absorption spectra of reaction mixture at an interval of 5min

Following the general procedure for non-directed C-H olefination, the UV-visible absorption of the substrates *O*-xylene, ligand, Pd(OAc)2, Eosin Y, Methyl acrylate and reaction mixture was determined at the standard reaction concentration (0.2 M) in HFIP as a solvent.


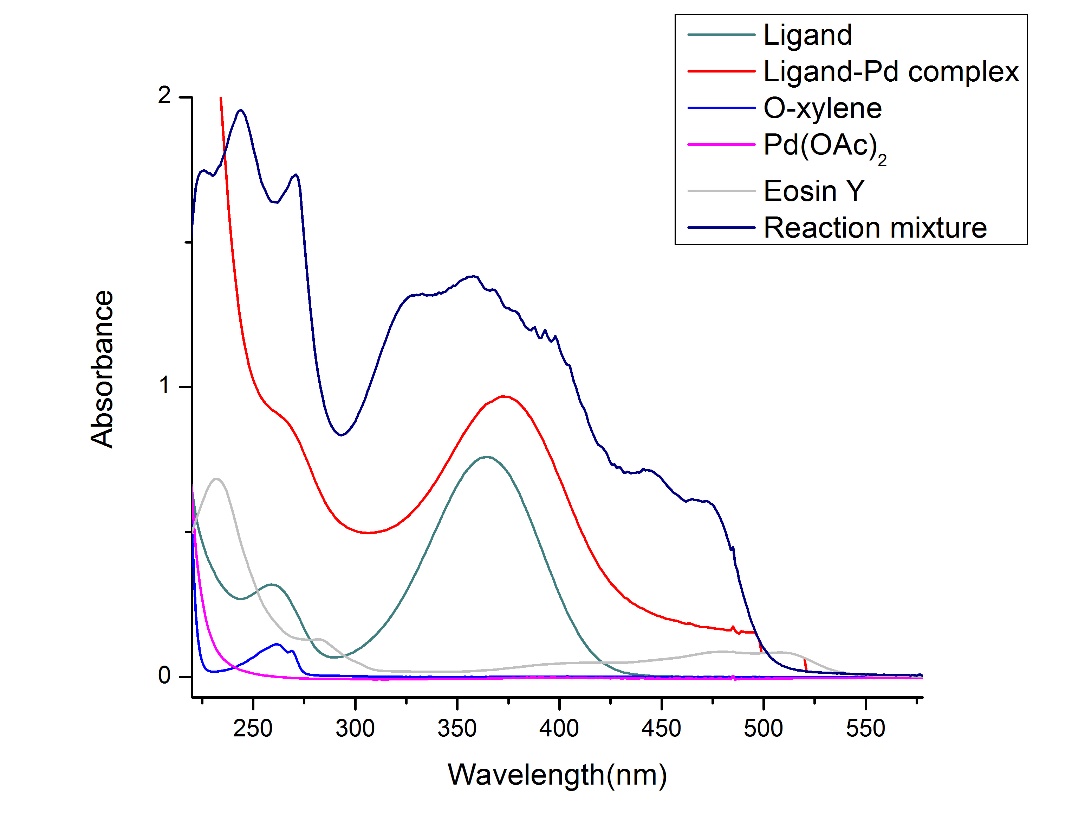


**Figure S6:** UV-visible absorption spectra of all reaction components and reaction mixture

According to the both of the UV/vis spectra, there is a broad signal around the range of 360 to 500 nm. Hence, the species forming in reaction mixture falls in the visible light region and it is the light absorbing species.

**3.7. X-Ray Structure of [Pd3(L10)6] Complex (CCDC 2045974):**

**Figure S7:** ORTEP view of the [Pd3(L10)6] Complex with ellipsoids at 50% probability

**Crystallographic data**

| Identification code | DMAJ 2-37 |
| --- | --- |
| Formula | C36H34N12O20Pd3 |
| Formula weight(g/mol) | 1273.95 |
| Temperature/K | 150 K |
| Crystal system | Trigonal |
| Space group | -R3 |
| a/Å | 16.9255(9) |
| b/Å | 16.9255(9) |
| c/Å | 29.689(2) |
| a/o | 90 |
| b/o | 90 |
| g/o | 120 |
| Volume/Å3 | 7365.7(10) |
| Z | 6 |
| Rcalcg/cm3 | 1.723 |
| m/mm-1 | 1.173 |
| F(000) | 3792 |
| Crystal size/mm3 | 0.128 x 0.121x 0.015 |
| Radiation | MoKa (l = 0.71073) |
| 2θ range for data collection/o | 1.95 to 20.82 |
| Index ranges | -16<=h<=16, -16<=k<16, -29<=l<=29 |
| Reflections collected / unique | 21062/ 1712 [R(int) = 0.0957] |
| Data / restraints / parameters | 1712 / 0 / 216 |
| Goodness-of-fit on F2 | 1.153 |
| Final R indices [I>2s(I)] | R1 = 0.0406, wR2 = 0.1247 |
| R indices (all data) | R1 = 0.0480, wR2 = 0.1292 |
| Largest diff. peak and hole/ e Å-3 | 1.507 and -0.555 |

**3.8. Fukui value calculations-Population Analysis and Visualization:**9

**Computational Details:**

Population analysis on both the N and N-1 electron systems were carried out with B3LYP also included in Gaussian 09 suite of programs. Molecular geometries for the N electron systems were performed with the 6-31G** basis set and confirmed as stationary points with no imaginary frequencies. Fukui index values for electrophilic attack were derived by comparison of the population analyses.

**Population Analysis and Visualization:**

Population Analysis and Visualization was performed on the following compounds:

**1. Toluene**

**2. Nitrobenzene**

**3. Fluorobenzene**

**4. 2-acetyl thiophene**

**5. Pyridine**

Key for Table Entries:

**Atom:** the atom numbering corresponding to the structure

**q(N):** the natural population of the corresponding atom for the N-electron system, obtained from B3LYP/6-31G**

**q(N-1):** the natural population of the corresponding atom for the N-1 electron system, obtained from B3LYP/6-31G**

***f* :** the Fukui function value corresponding to the substrate behaving as a nucleophile, obtained by subtracting q(N-1) from q(N)

**Toluene**

| **Legend** | **Partial charge Population of N Electron System** | **Partial charge Population of N-1 Electron System** | **Gradient Map for Fukui Function** |
| --- | --- | --- | --- |
| **Atom** | **q(N)** | **q(N-1)** | ***f*** |
|  |  |  |  |
| 1 | -0.050 | -0.027 | 0.077 |
| 2 | -0.046 | -0.029 | 0.075 |
| 3 | -0.051 | -0.101 | 0.152 |

**Nitrobenzene**

| **Legend** | **Partial charge Population of N Electron System** | **Partial charge Population of N-1 Electron System** | **Gradient Map for Fukui Function** |
| --- | --- | --- | --- |
| **Atom** | **q(N)** | **q(N-1)** | ***f*** |
|  |  |  |  |
| 1 | -0.030 | -0.087 | 0.117 |
| 2 | -0.031 | -0.094 | 0.125 |
| 3 | -0.022 | -0.027 | 0.049 |

**Fluorobenzene**

| **Legend** | **Partial charge Population of N Electron System** | **Partial charge**  **Population of N-1 Electron System** | **Gradient Map for Fukui Function** |
| --- | --- | --- | --- |
| **Atom** | **q(N)** | **q(N-1)** | ***f*** |
|  |  |  |  |
| 1 | -0.056 | -0.031 | 0.087 |
| 2 | -0.037 | -0.041 | 0.078 |
| 3 | -0.051 | -0.107 | 0.158 |

**2-acetyl thiophene**

| **Legend** | **Partial charge Population of N Electron System** | **Partial charge Population of N-1 Electron System** | **Gradient Map for Fukui Function** |
| --- | --- | --- | --- |
| **Atom** | **q(N)** | **q(N-1)** | ***f*** |
|  |  |  |  |
| 1 | -0.040 | -0.031 | 0.071 |
| 2 | -0.050 | -0.006 | 0.056 |
| 3 | -0.051 | -0.016 | 0.067 |

**Pyridine**

| **Legend** | **Partial charge Population of N Electron System0000000** | **Partial charge Population of N-1 Electron System** | **Gradient Map for Fukui Function** |
| --- | --- | --- | --- |
| **Atom** | **q(N)** | **q(N-1)** | ***f*** |
|  |  |  |  |
| 1 | -0.026 | -0.054 | 0.080 |
| 2 | -0.048 | -0.027 | 0.075 |
| 3 | -0.022 | -0.103 | 0.081 |

**4. References:**

1. [Boele](https://pubs.acs.org/action/doSearch?field1=Contrib&text1=Maarten+D.+K.++Boele), M. D. K., [Strijdonck](https://pubs.acs.org/action/doSearch?field1=Contrib&text1=Gino+P.+F.++van+Strijdonck), G. P. F. V., [Vries](https://pubs.acs.org/action/doSearch?field1=Contrib&text1=Andr%C3%A9+H.+M.++de+Vries), A. H. M. D., [Kamer](https://pubs.acs.org/action/doSearch?field1=Contrib&text1=Paul+C.+J.++Kamer), Paul C. J., [Vries](https://pubs.acs.org/action/doSearch?field1=Contrib&text1=Johannes+G.++de+Vries), J. G. D., [Leeuwen](https://pubs.acs.org/action/doSearch?field1=Contrib&text1=Piet+W.+N.+M.++van+Leeuwen), P. W. N. M. V. Selective Pd-Catalyzed Oxidative Coupling of Anilides with Olefins through C−H Bond Activation at Room Temperature. *J. Am. Chem. Soc.* **8**,1586–1587 (2002).

2.[Wang](https://chemistry-europe.onlinelibrary.wiley.com/action/doSearch?ContribAuthorStored=Wang%2C+Cong), Cong., [Ge](https://chemistry-europe.onlinelibrary.wiley.com/action/doSearch?ContribAuthorStored=Ge%2C+Haibo), H. Silanol as a Removable Directing Group for the PdII‐Catalyzed Direct Olefination of Arenes. *Chem. Eur. J.*, **17**, 14371-14374 (2011).

3. (a) Bera, M; Maji, A.; Sahoo, S. K.; Maiti, D. Palladium(II)‐Catalyzed *meta*‐C**-**H Olefination: Constructing Multisubstituted Arenes through Homo‐Diolefination and Sequential Hetero‐Diolefination. *Angew. Chem. Int. Ed.* **54**, 8515-8519 (2011). (b) Patra, T.; Watile, R. A.; Agasti, S.; Togati, N.; Maiti, D. Sequential meta-C–H olefination of synthetically versatile benzyl silanes: effective synthesis of meta-olefinated toluene, benzaldehyde and benzyl alcohols. *Chem. Commun.* **52**, 2027-2030 (2016). (c) Bera, M.; Sahoo, S. K.; Maiti, D. Room-Temperature *meta*-Functionalization: Pd(II)-Catalyzed Synthesis of 1,3,5-Trialkenyl Arene and *meta*-Hydroxylated Olefin. *ACS Catal.* **6**, 3575-3579 (2016). (d) Modak, A.; Mondal, A.; Watile, R.; Mukherjee, S.; Maiti, D. Remote meta-C–H bond functionalization of 2-phenethylsulphonic acid and 3-phenylpropanoic acid derivatives. *Chem. Commun.* **52**, 13916-13919 (2016). (e) Maity, S.; Hoque, E.; Dhawa, U.; Maiti, D. Palladium catalyzed selective distal C–H olefination of biaryl systems. *Chem. Commun.* **52**, 14003-14006 (2016). (f) Dutta, U.; Porey, S.; Pimparkar, S.; Mandal, A; Grover, J; Koodan, A; Maiti, D. Para-Selective Arylation of Arenes: A Direct Route to Biaryls by Norbornene Relay Palladation. *Angew. Chem. Int. Ed.***59***,* 20831-20836 (2020).

4. Dutta, U.; Maiti, S.; Pimparkar, S.; Maiti, S.; Gahan, L. R.; Krenske, E. H.; Lupton, D. W.; Maiti, D. Rhodium catalyzed template-assisted distal para-C–H olefination. *Chem. Sci.* **10**, 7426-7432 (2019).

5. Wang, P., Verma, P., Xia, G., Shi, J., Qiao, J. X., Tao, S., Cheng, P. T. W., Poss, M. A., Farmer, M. E., Yeung, K.-S. & Yu, J.-Q. *Nature* **551**, 489–494 (2017).

6. Ye, M., Gao, G.-L. & Yu, J.-Q. Ligand-promoted C3 selective C–H olefination of pyridines with Pd catalysts. *J. Am. Chem. Soc.* **133**, 6964–6967 (2011).

7. Patra, T.; Bag, S.; Kancherla, R.; Mondal, A.; Dey, A.; Pimparkar, S.; Agasti, S.; Modak, A.; Maiti, D. Palladium-Catalyzed Directed *para*-C–H Functionalization of Phenols. *Angew. Chem. Int. Ed.* **55**, 7751-7755 (2016).

8. Jamode, V. S., Babrekar. S. A. Synthesis of Propan-1,3-diones and Chromens. *Chem. Asian J.* **21**, 3553-3556 (2009).

9. Fosu, S. C., Hambira, C. M., Chen, A. D., Fuchs, J. R. & Nagib, D. A. Site-selective C–H functionalization of (hetero)Arenes via transient, non-symmetric iodanes. *Chem* **5**, 417-428 (2019).

**5. NMR Spectra:**

**Ethyl (*E*)-3-(3,4-dimethylphenyl)acrylate (1):**


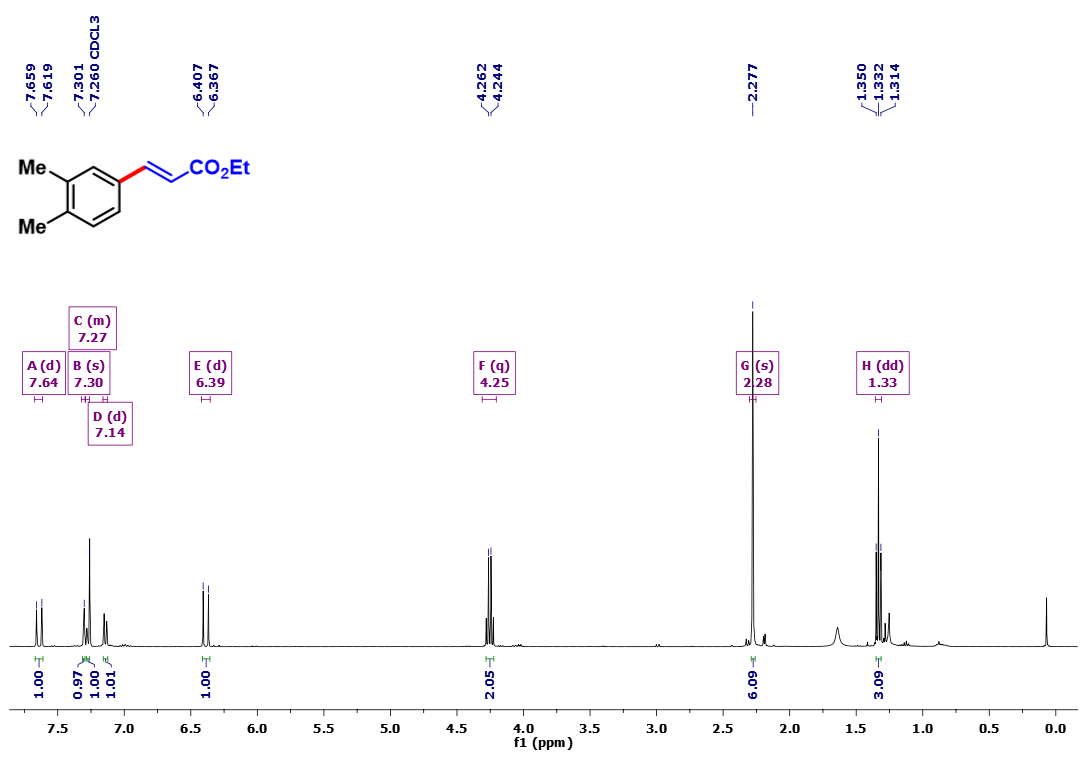


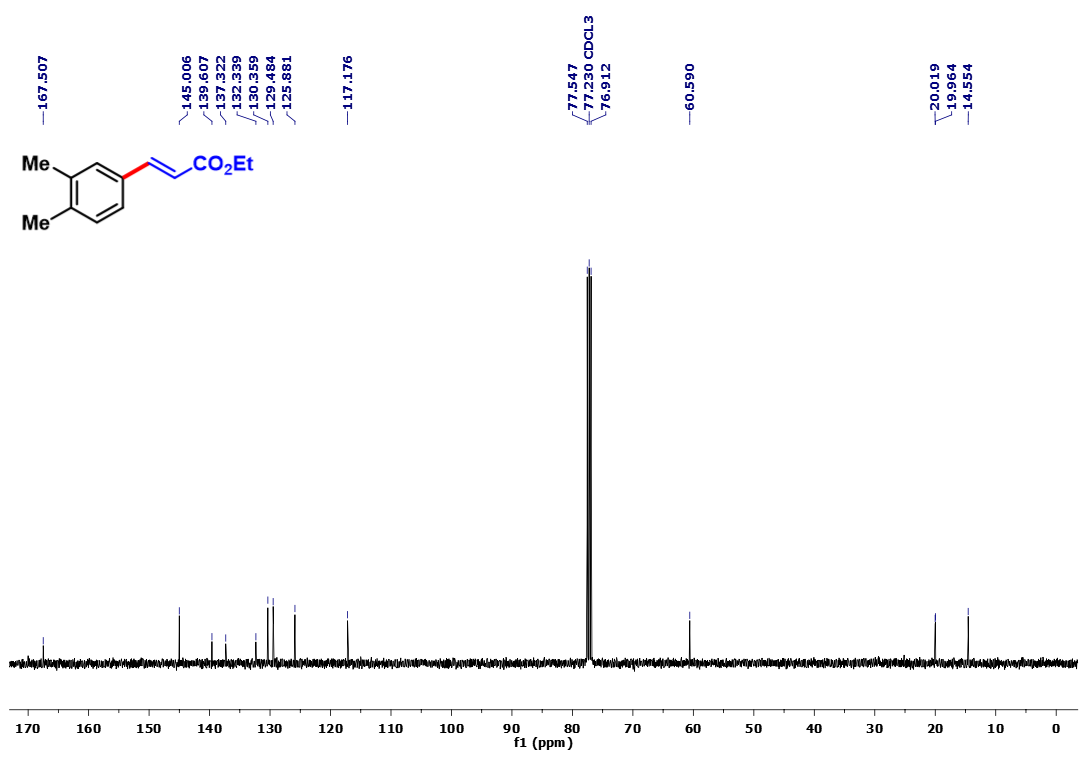


**Methyl (*E*)-3-(3,4-dimethylphenyl)acrylate (2):**


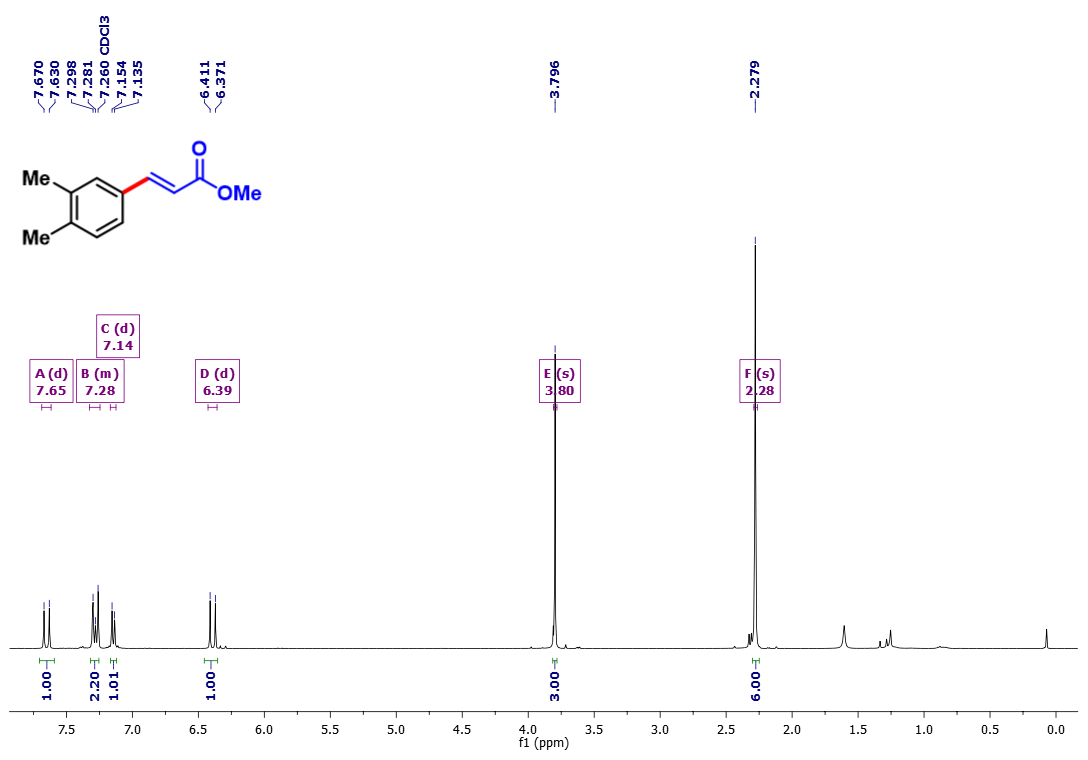


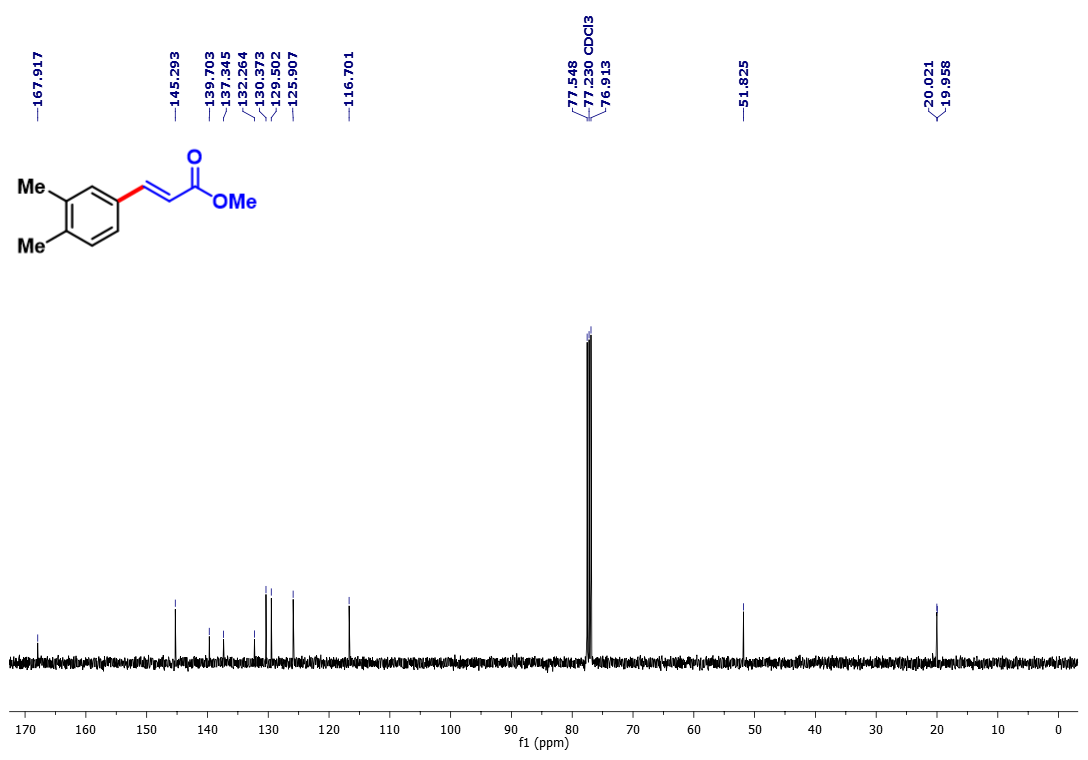


**Butyl (*E*)-3-(3,4-dimethylphenyl)acrylate (3):**


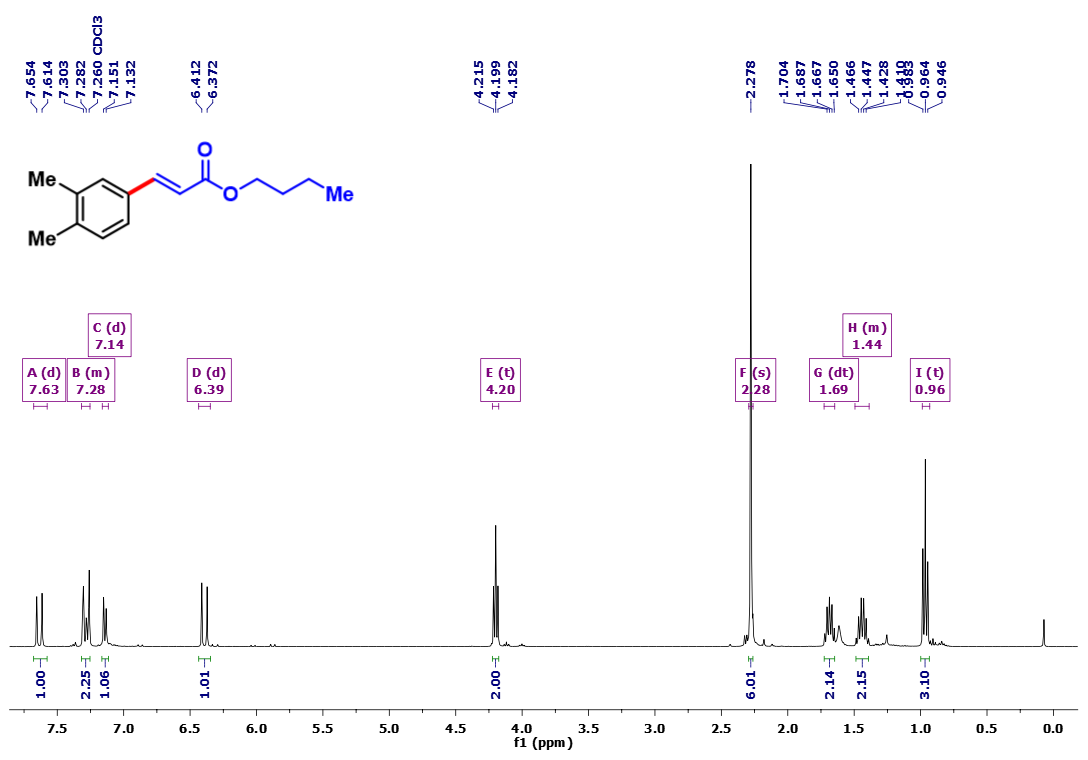


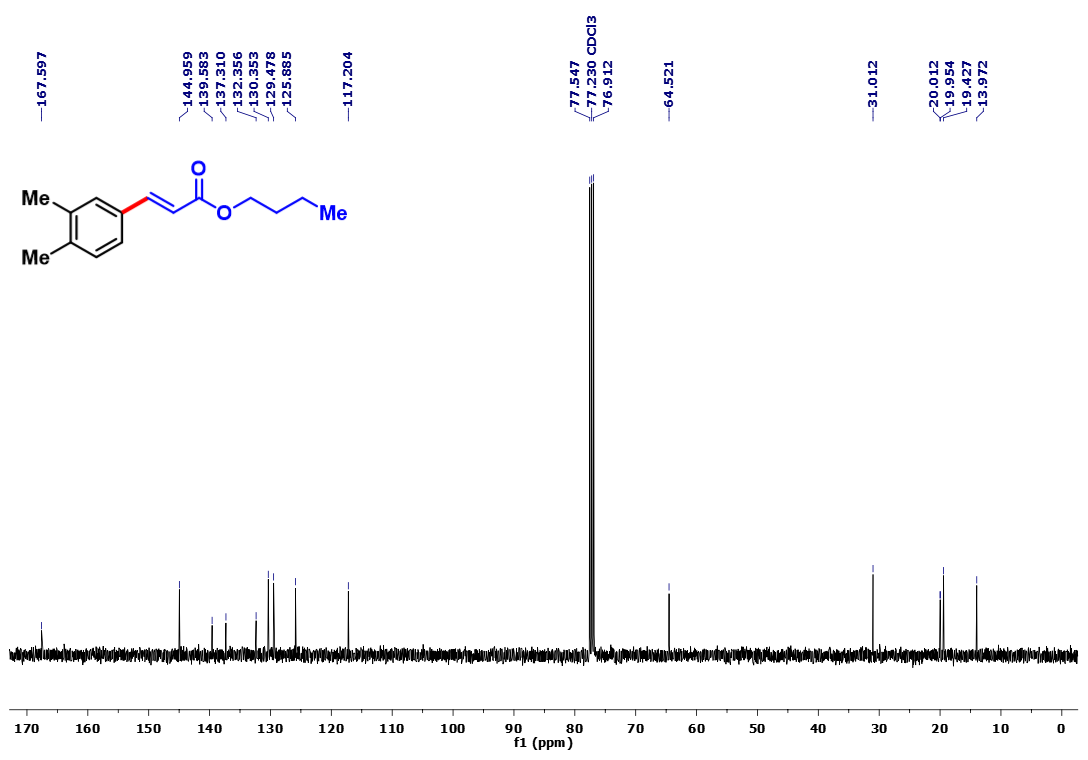


**Benzyl (*E*)-3-(3,4-dimethylphenyl)acrylate (4):**


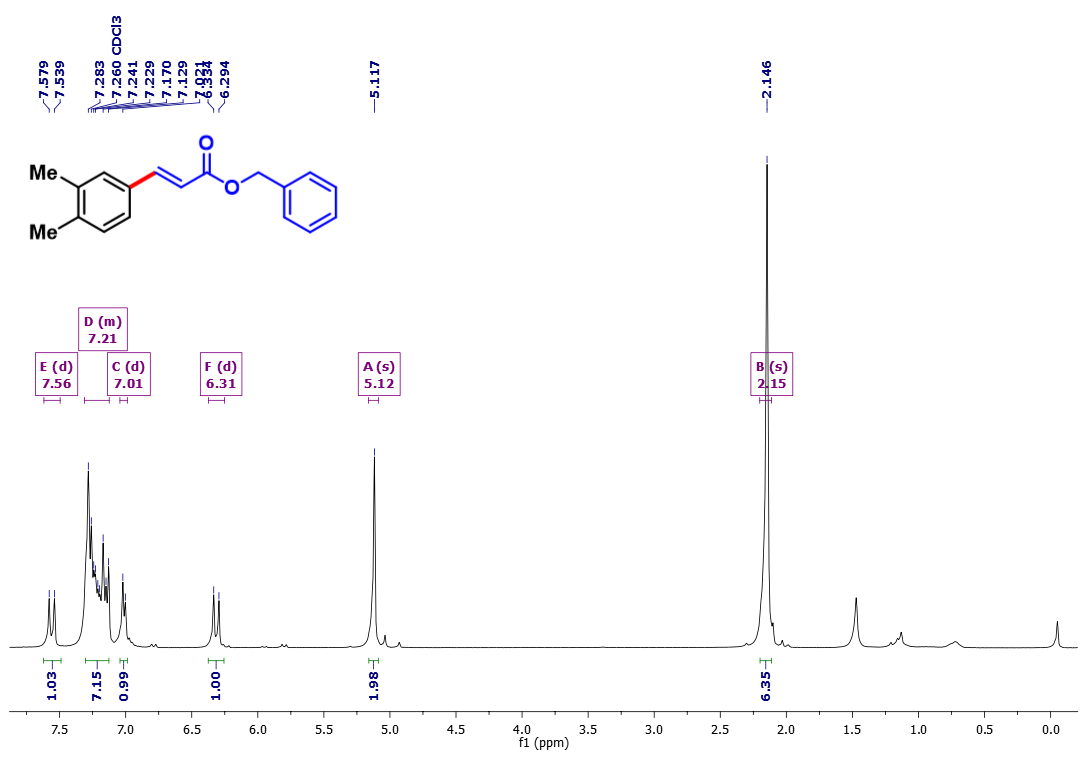


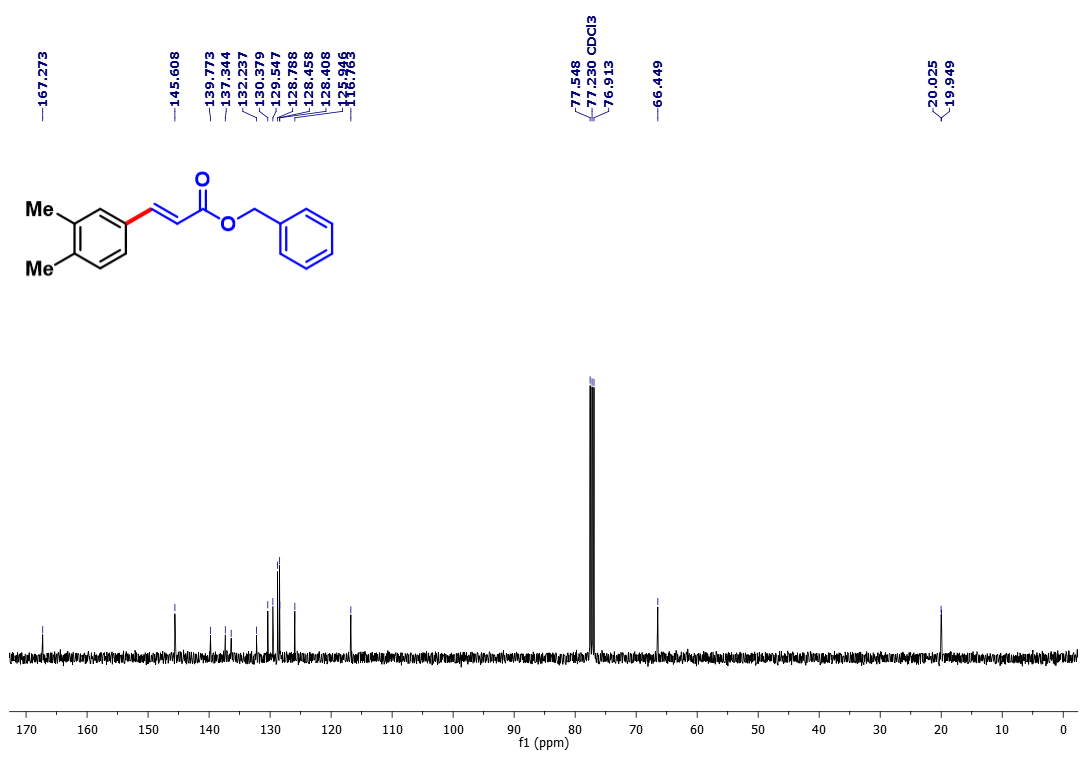


**Cyclohexyl (*E*)-3-(3,4-dimethylphenyl)acrylate (5):**


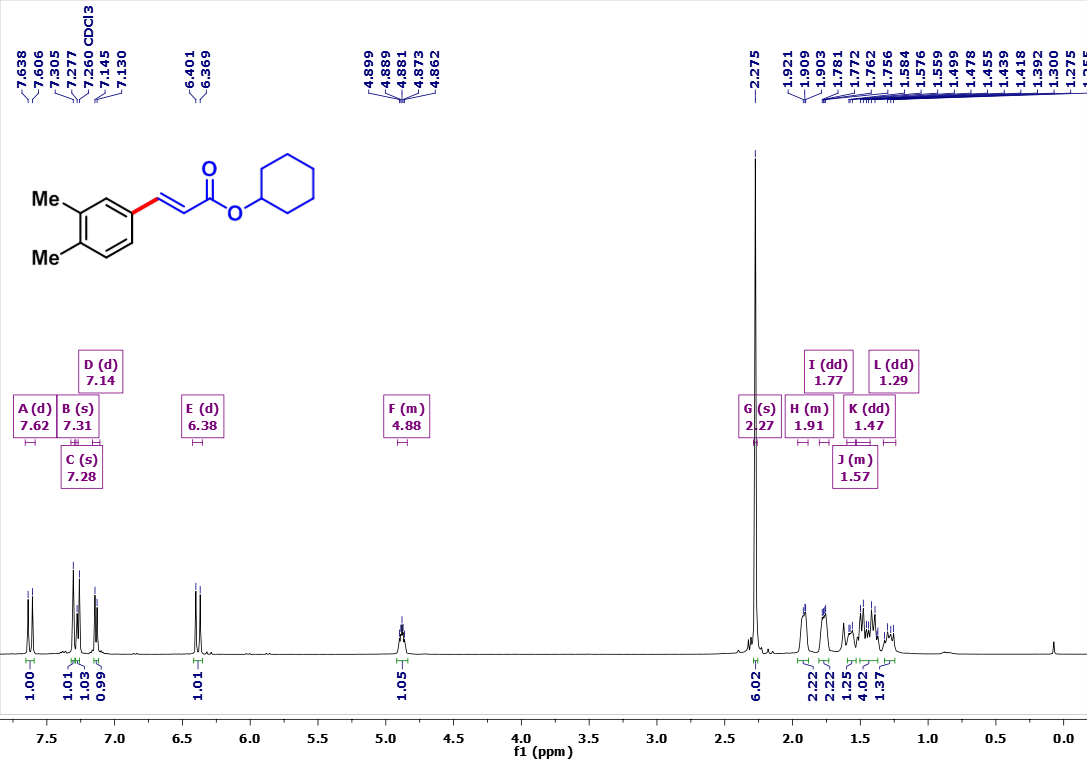


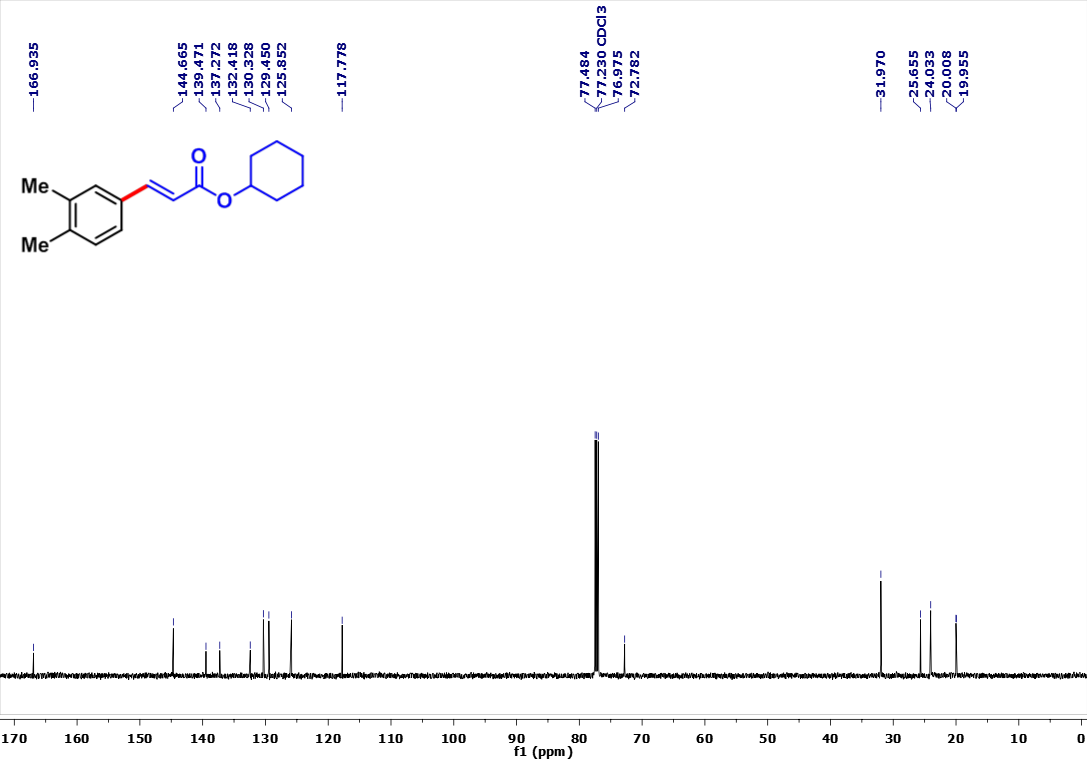


**2,2,2-Trifluoroethyl (*E*)-3-(3,4-dimethylphenyl)acrylate (6):**


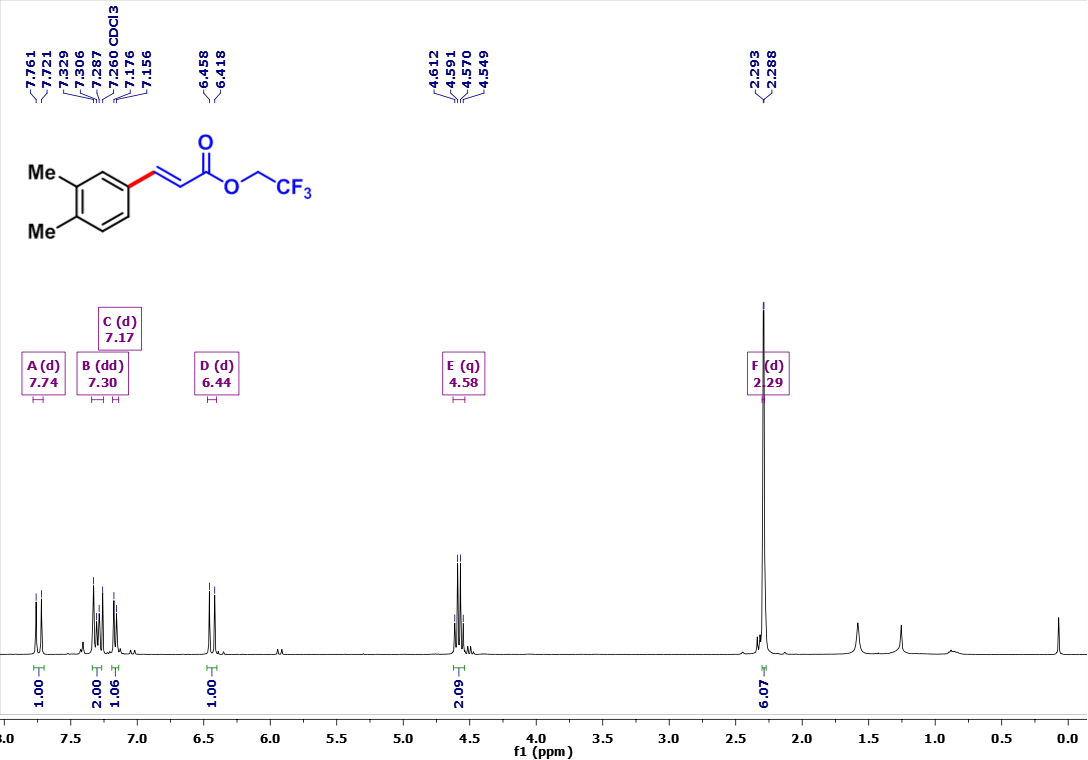


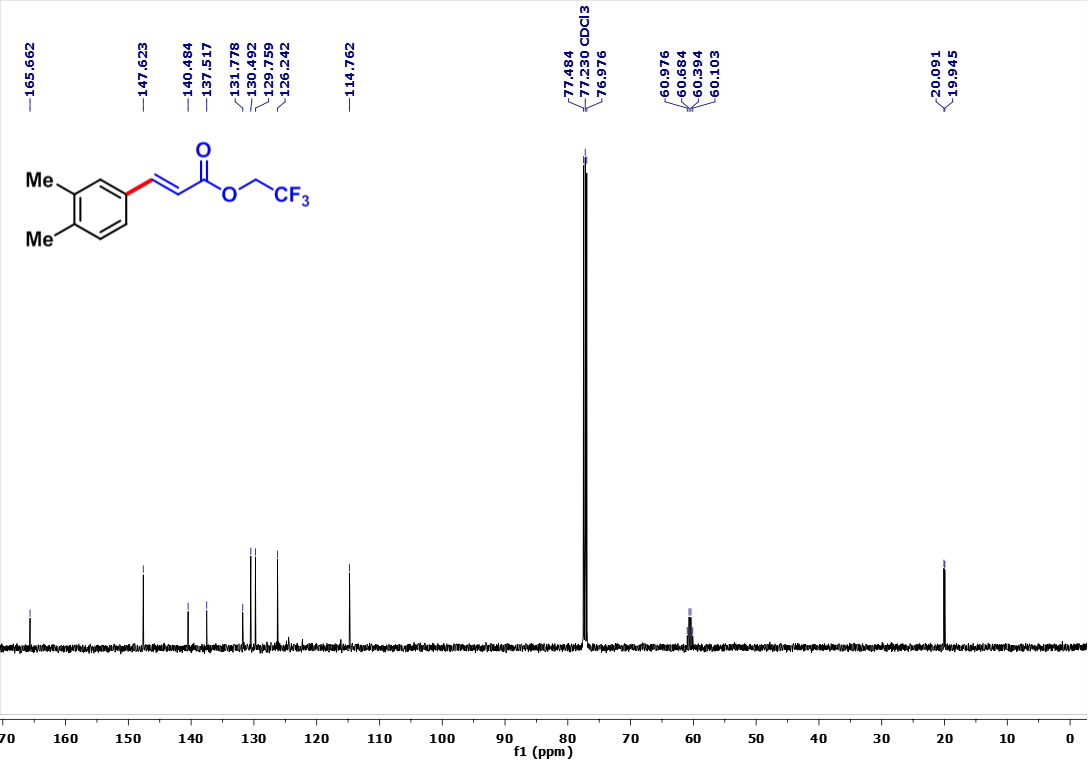


**(*E*)-3-(3,4-Dimethylphenyl)acrylic acid (7):**


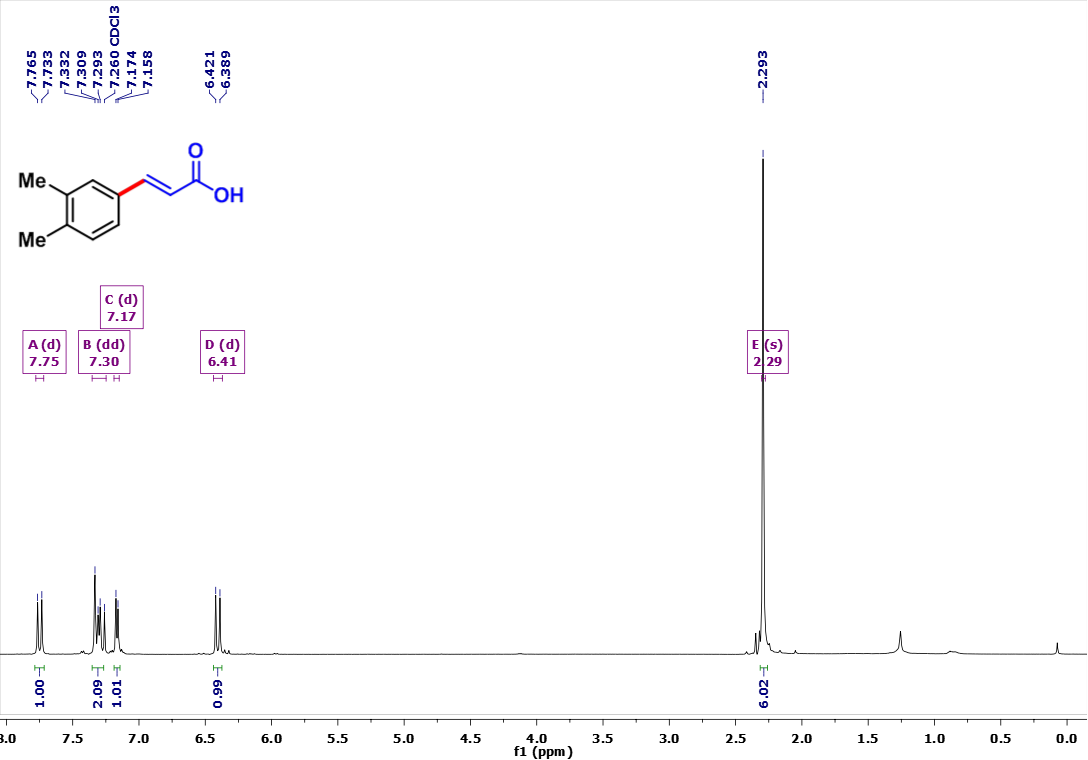


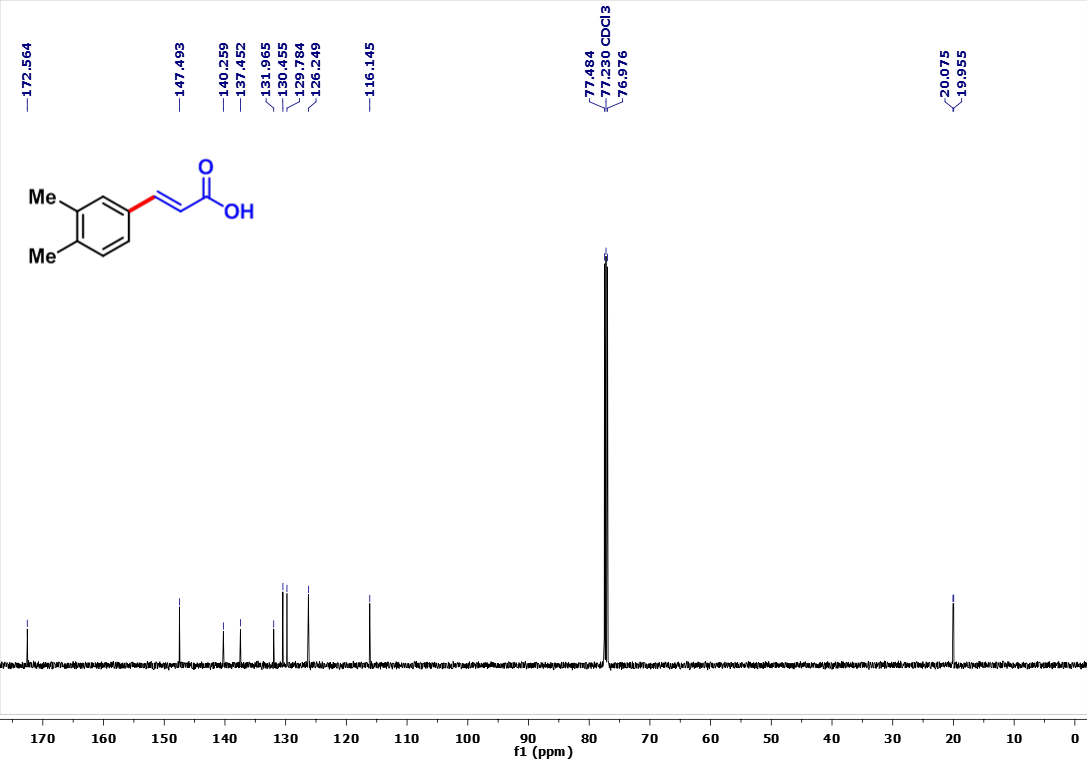


**(*E*)-1-(3,4-Dimethylphenyl)pent-1-en-3-one (8):**


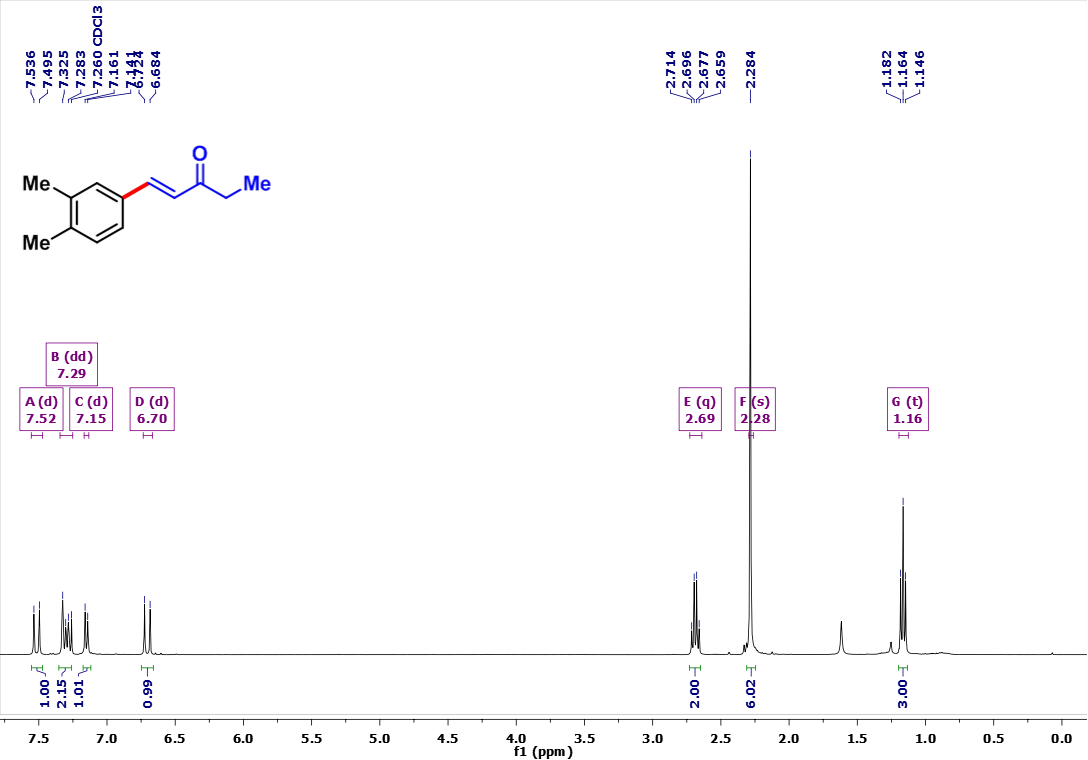


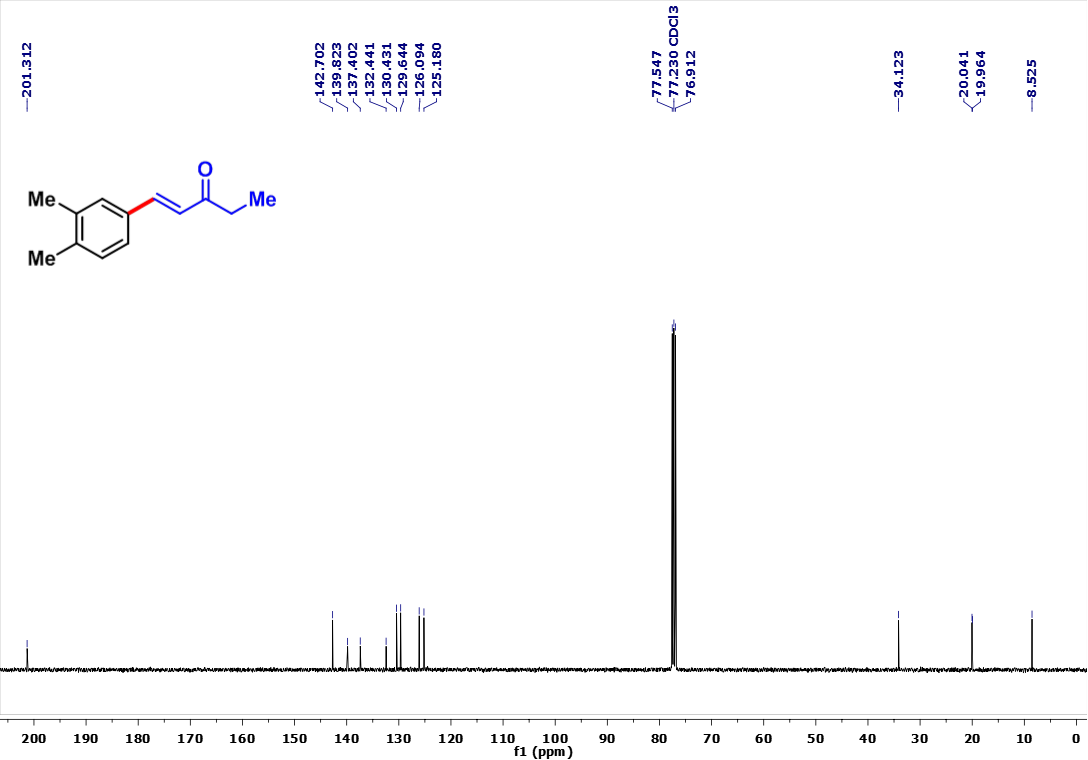


**(*E*)-3-(3,4-Dimethylphenyl)acrylonitrile (9):**


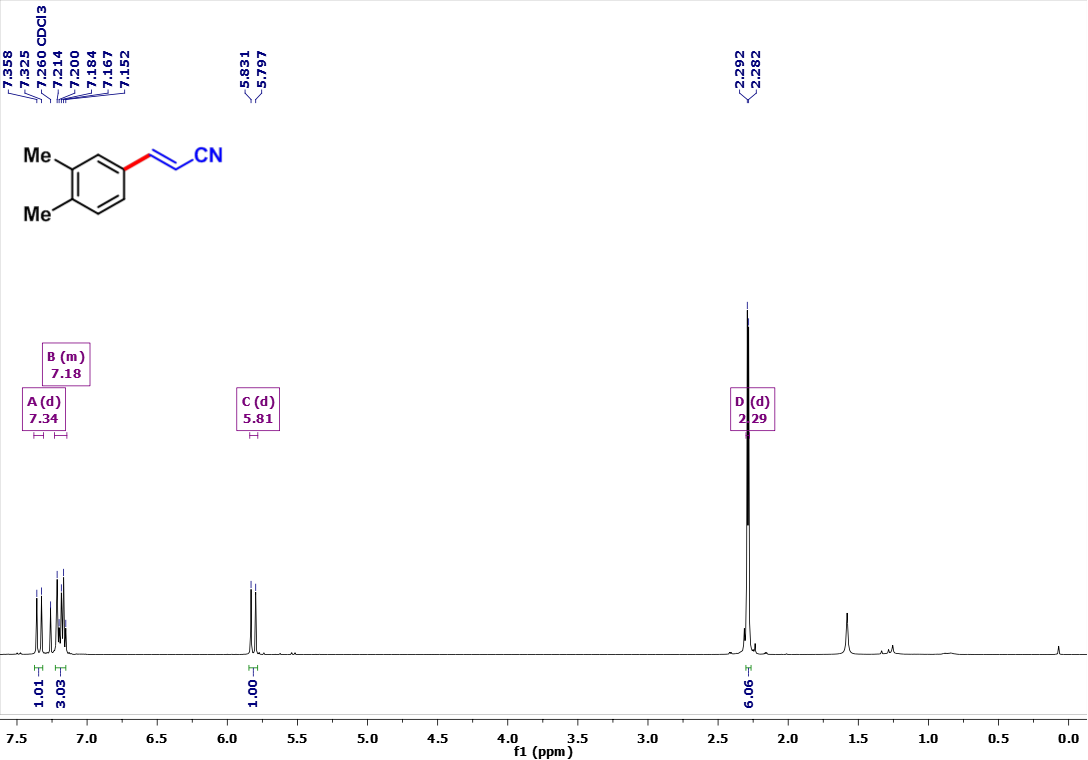


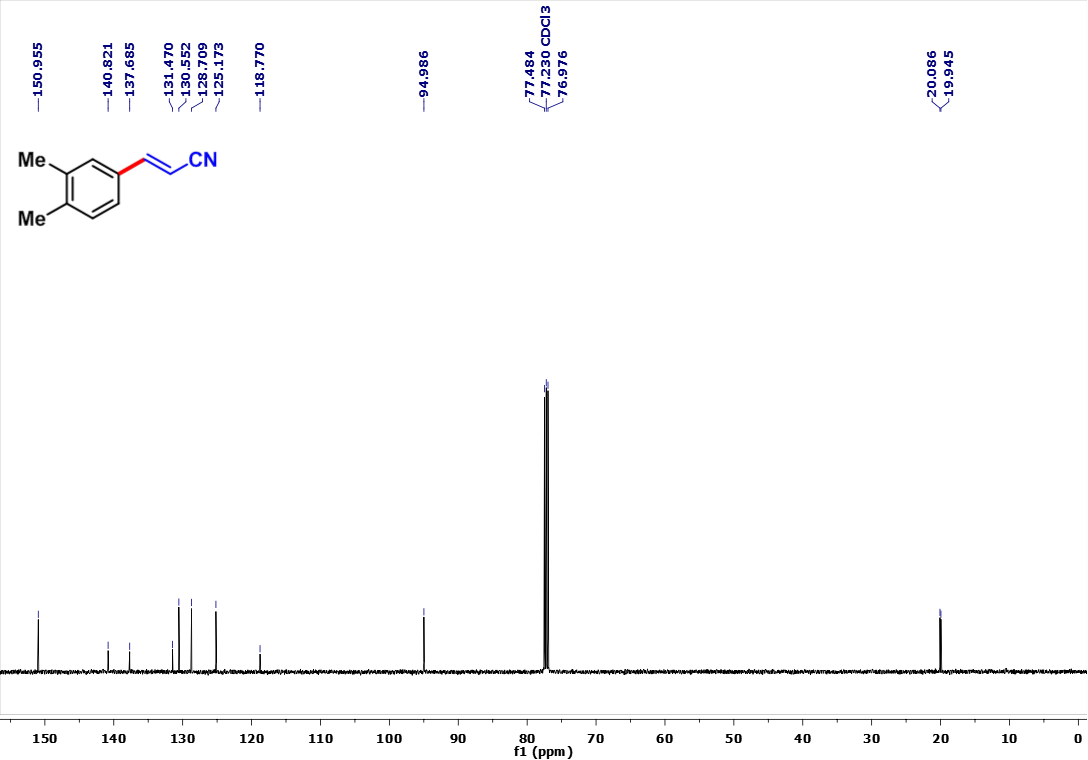


**Diethyl (*E*)-(3,4-dimethylstyryl)phosphonate (10):**


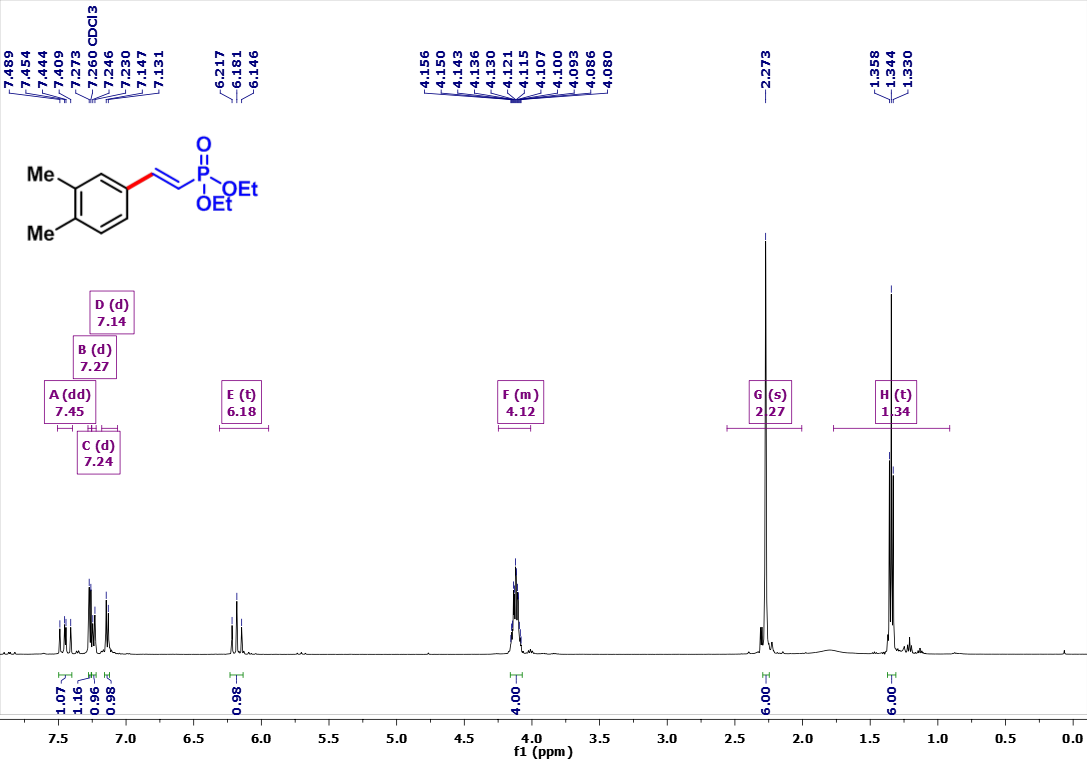


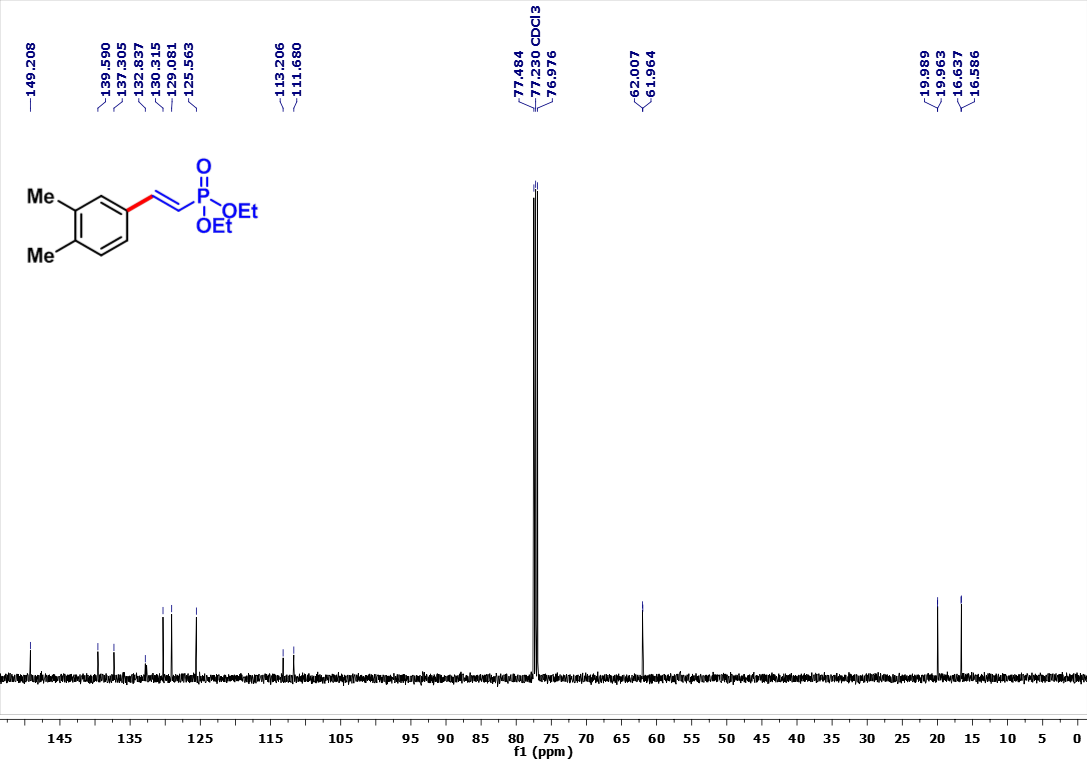


**(*E*)-1,2-Dimethyl-4-(2-(methylsulfonyl)vinyl)benzene (11):**


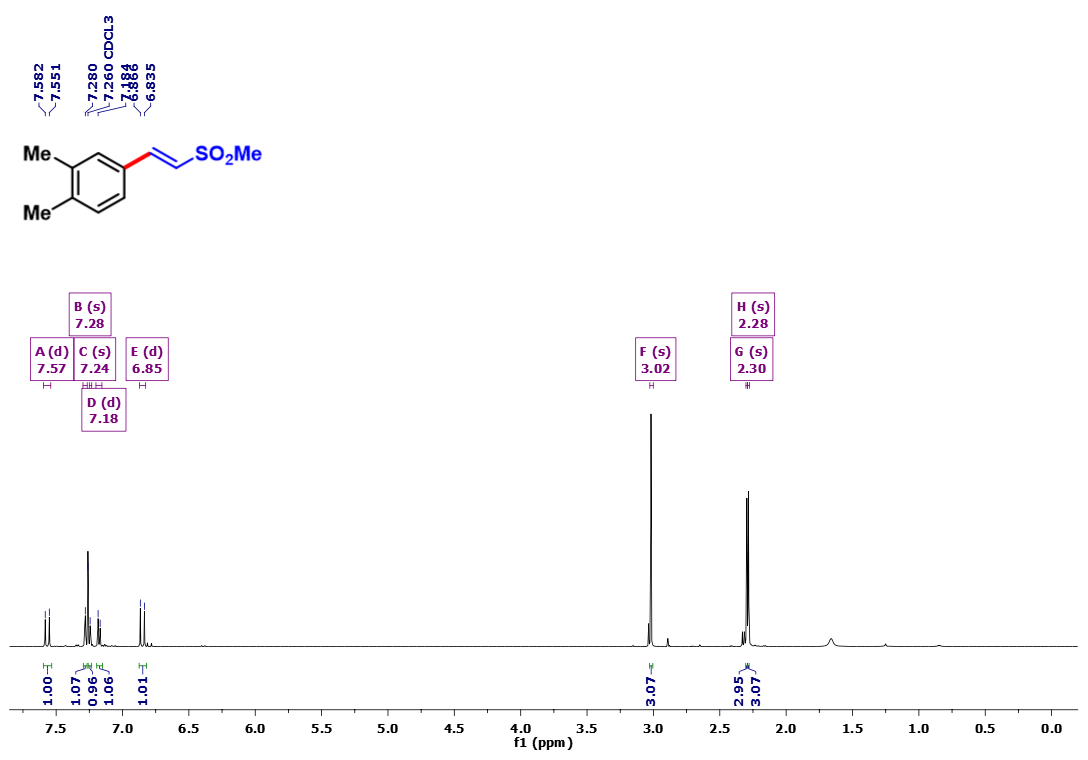


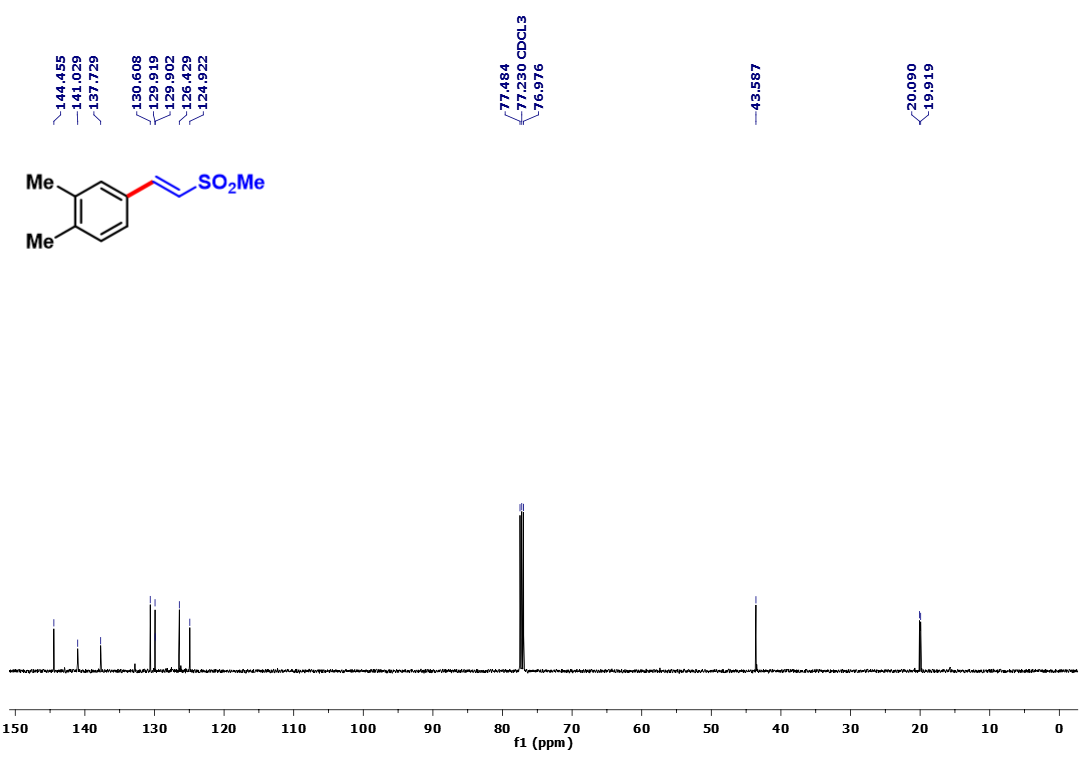


**Methyl (*R*)-5-(3,4-dimethylphenyl)cyclopent-1-ene-1-carboxylate (12):**


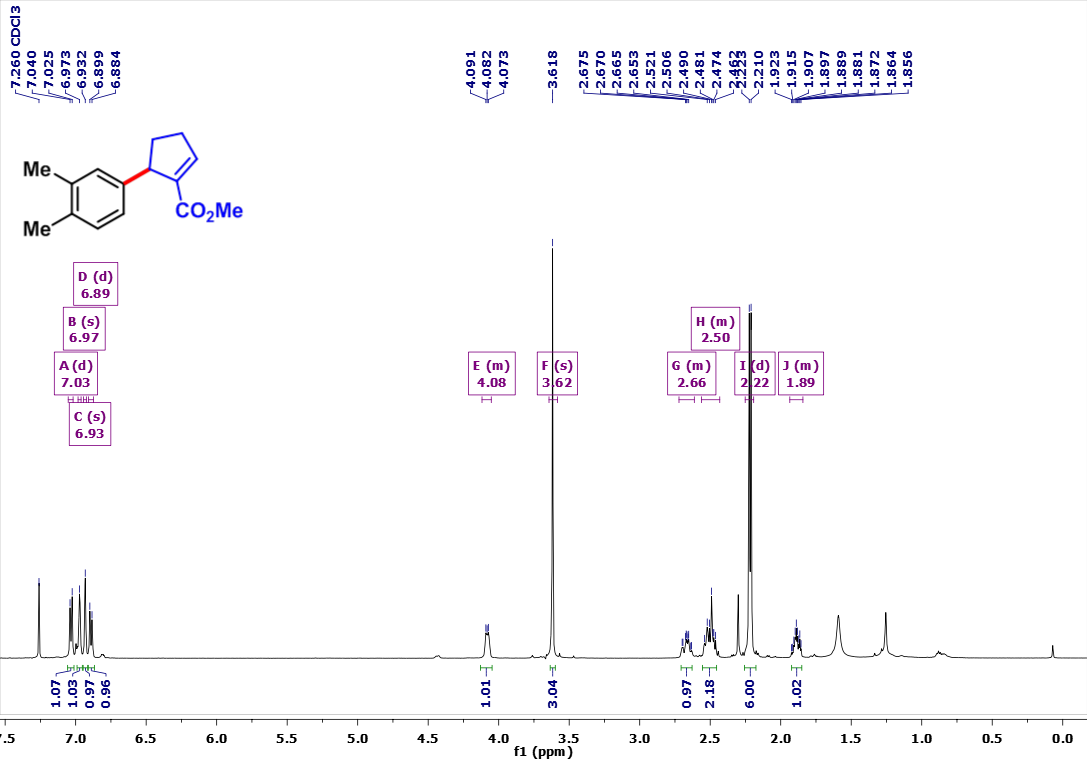


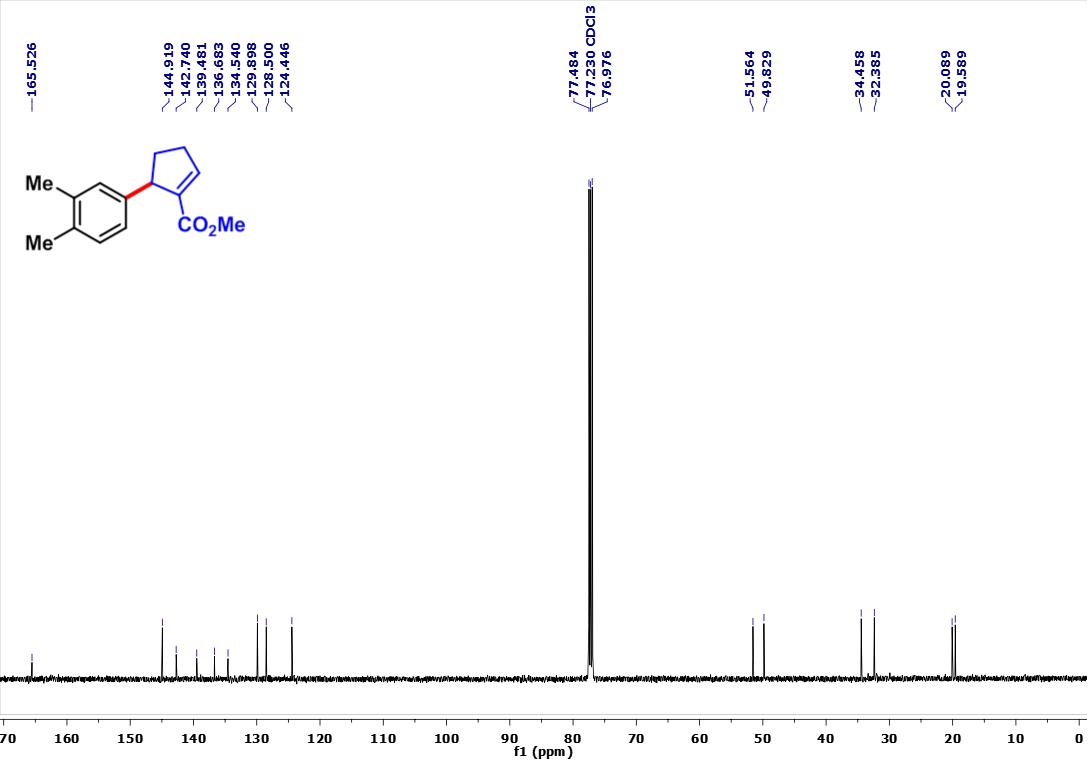


**Methyl cinnamate (13):**


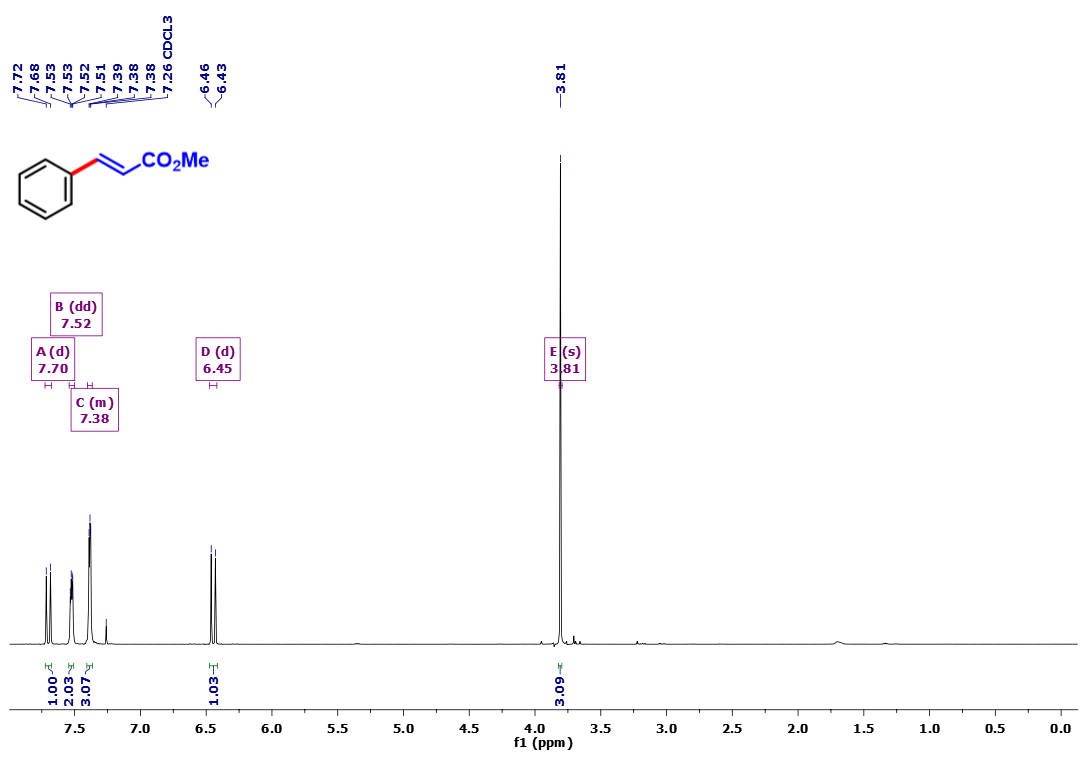


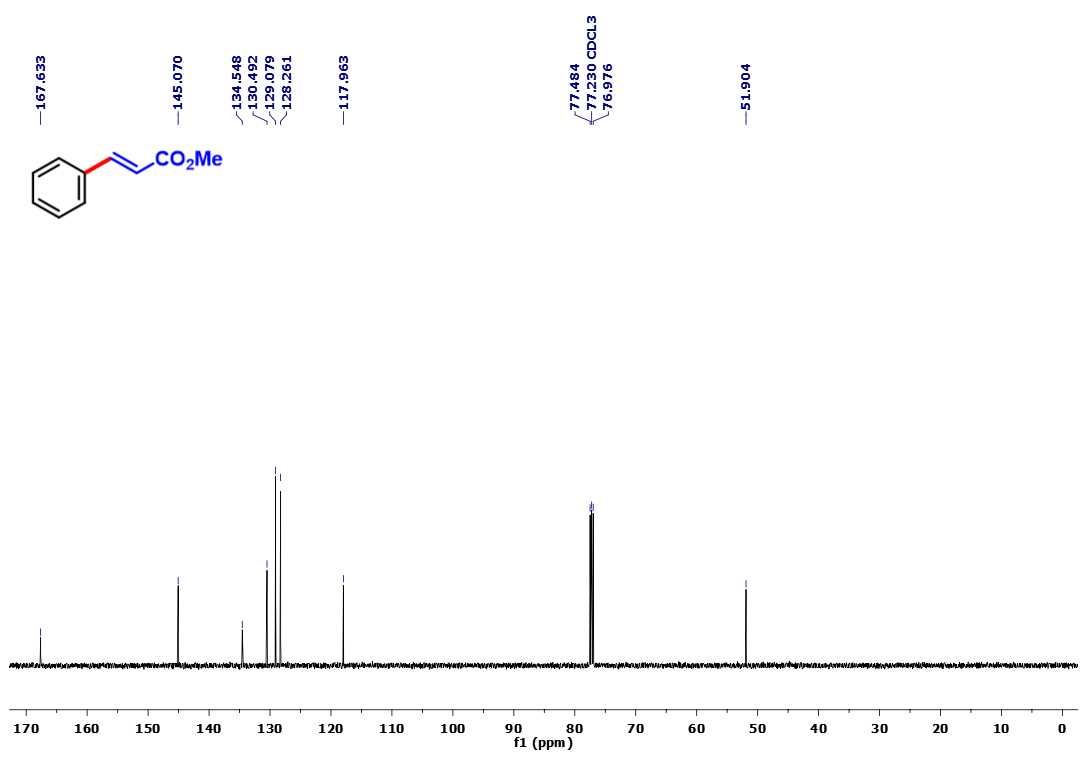


**Ethyl (*E*)-3-(*p*-tolyl)acrylate (14):**


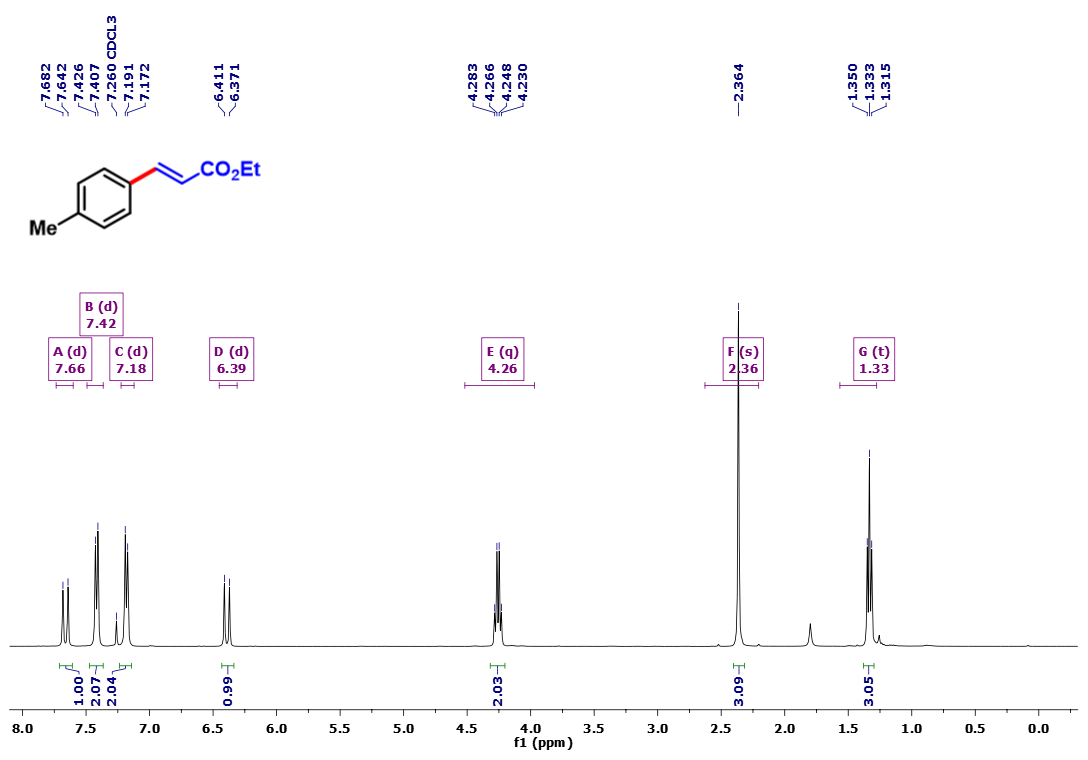


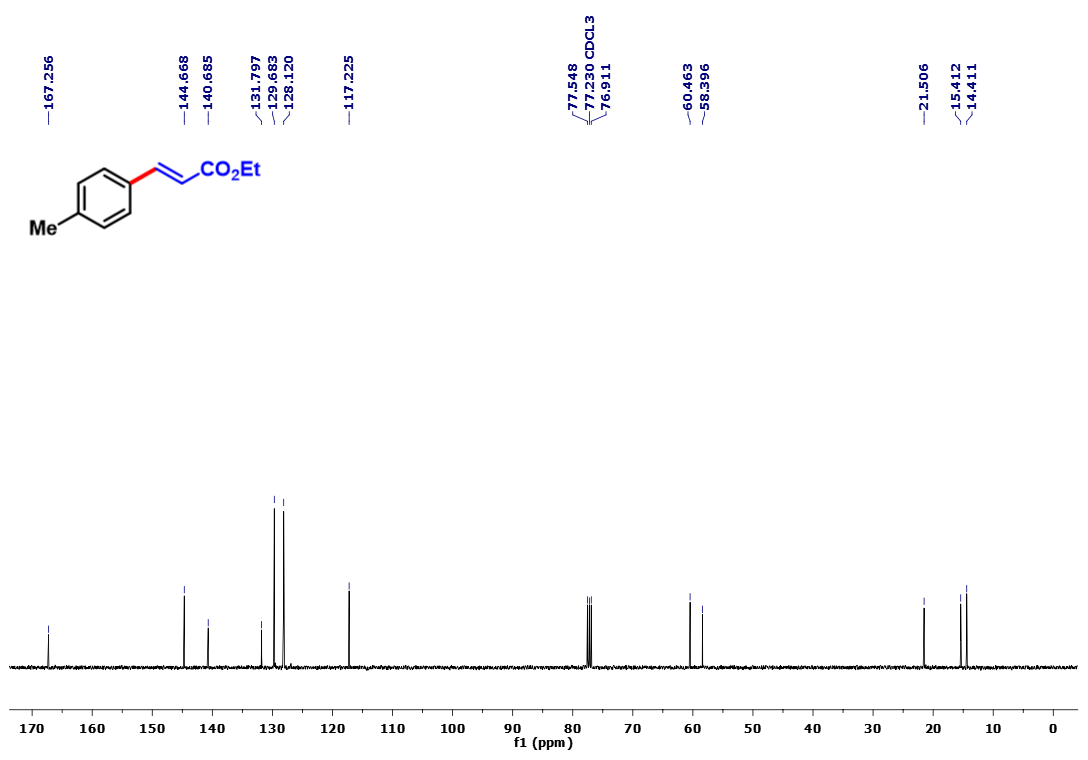


**Ethyl (*E*)-3-(4-methoxyphenyl)acrylate (15):**


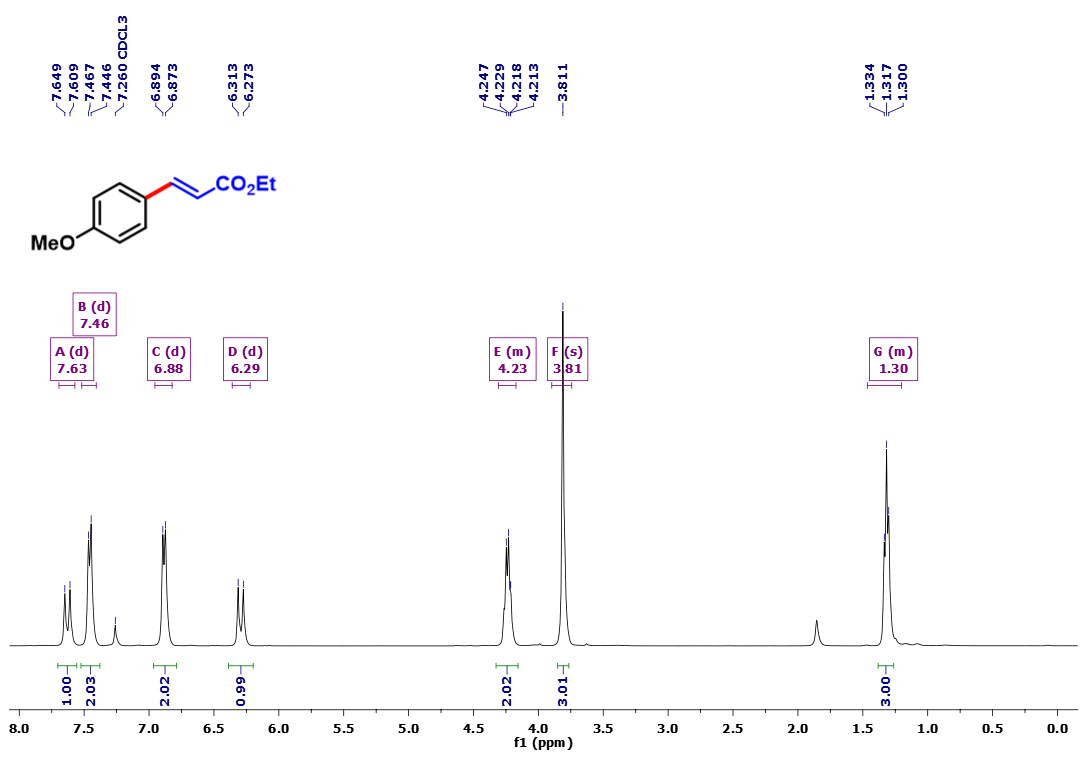


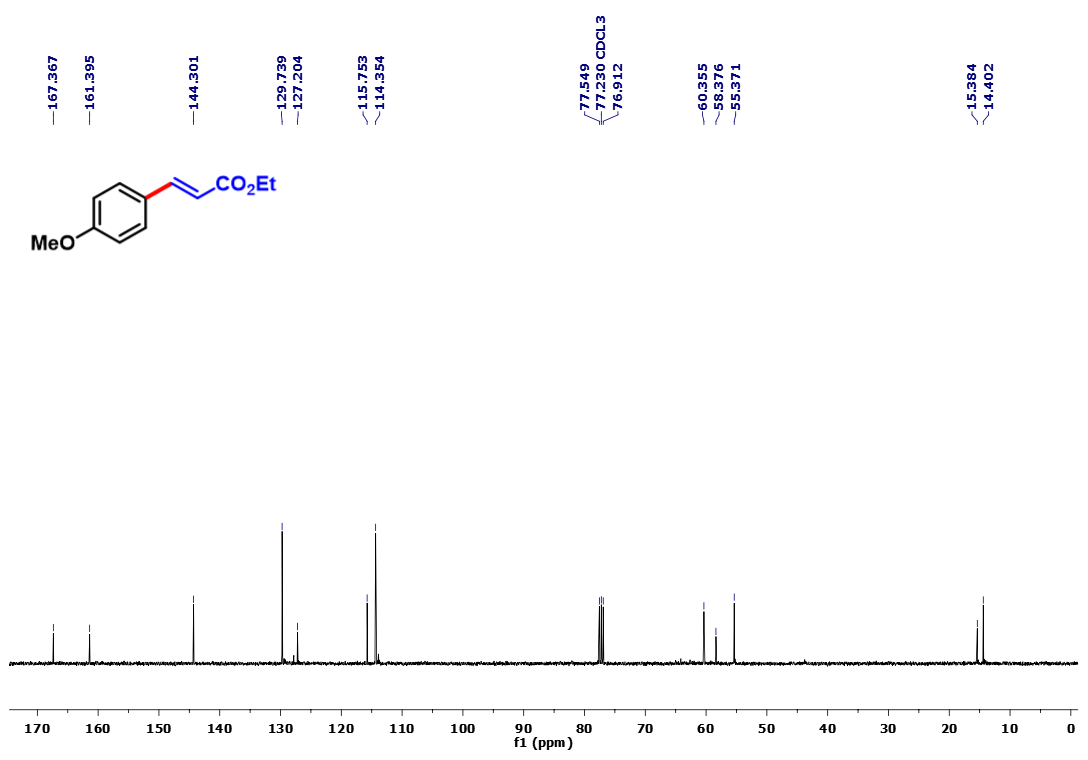


**Ethyl (*E*)-3-(4-chlorophenyl)acrylate (16):**


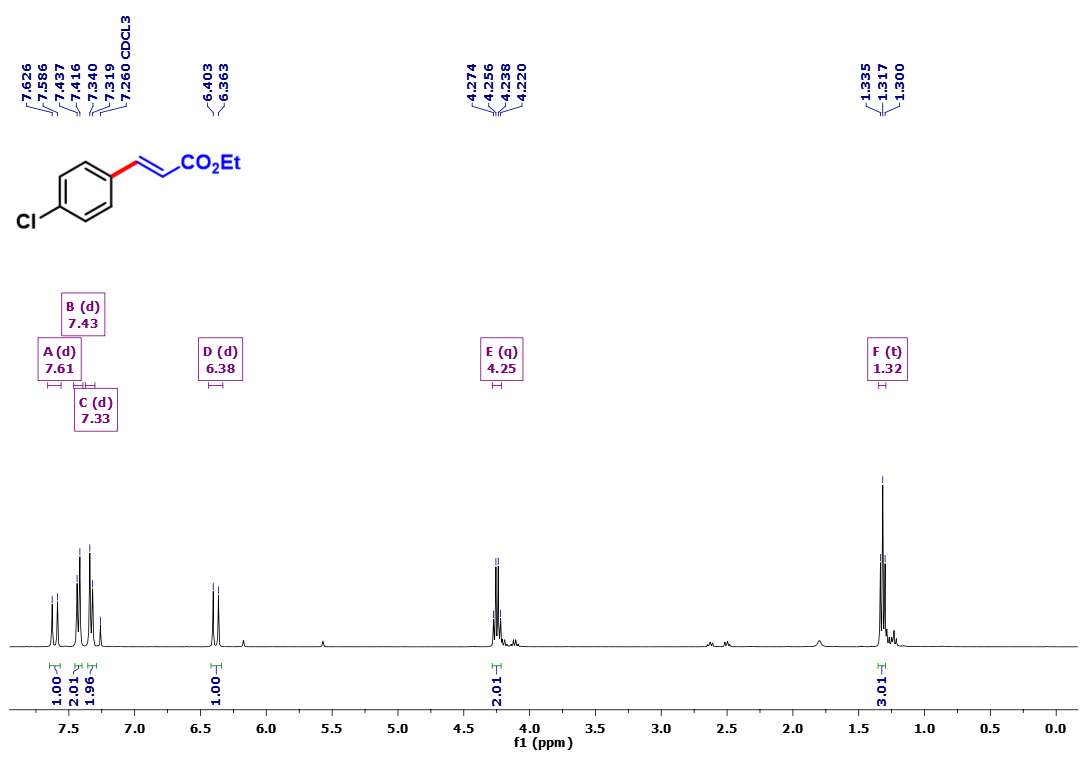


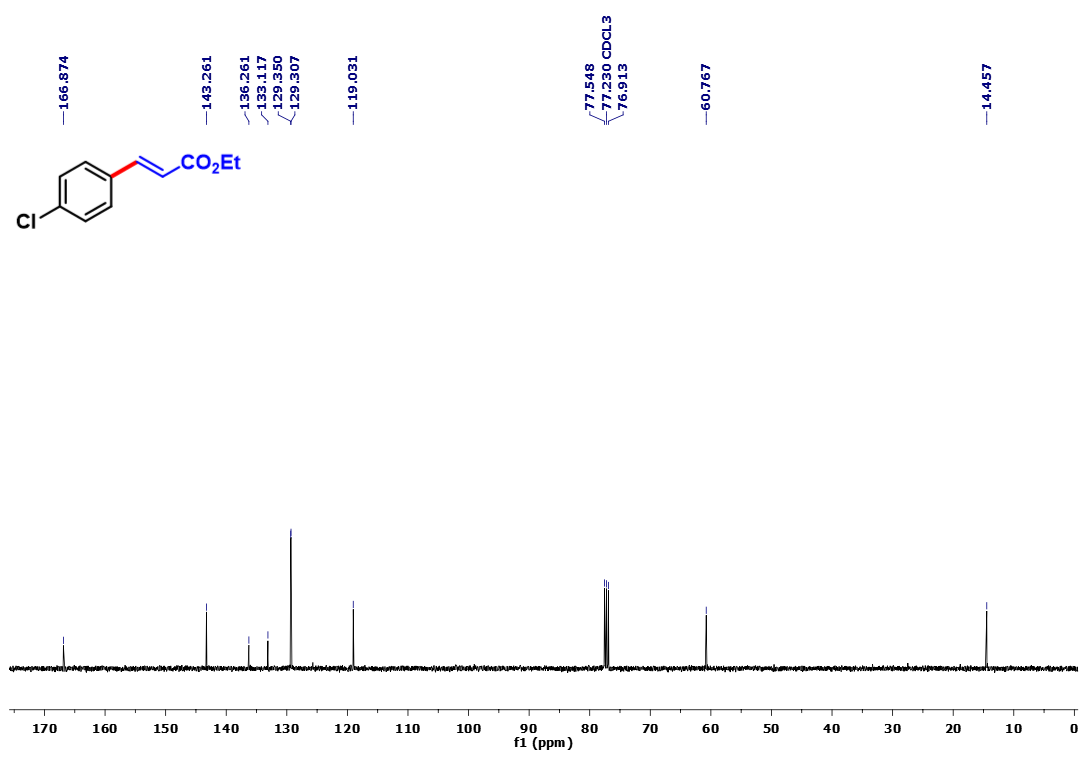


**Methyl (*E*)-3-(4-hydroxyphenyl)acrylate (17):**


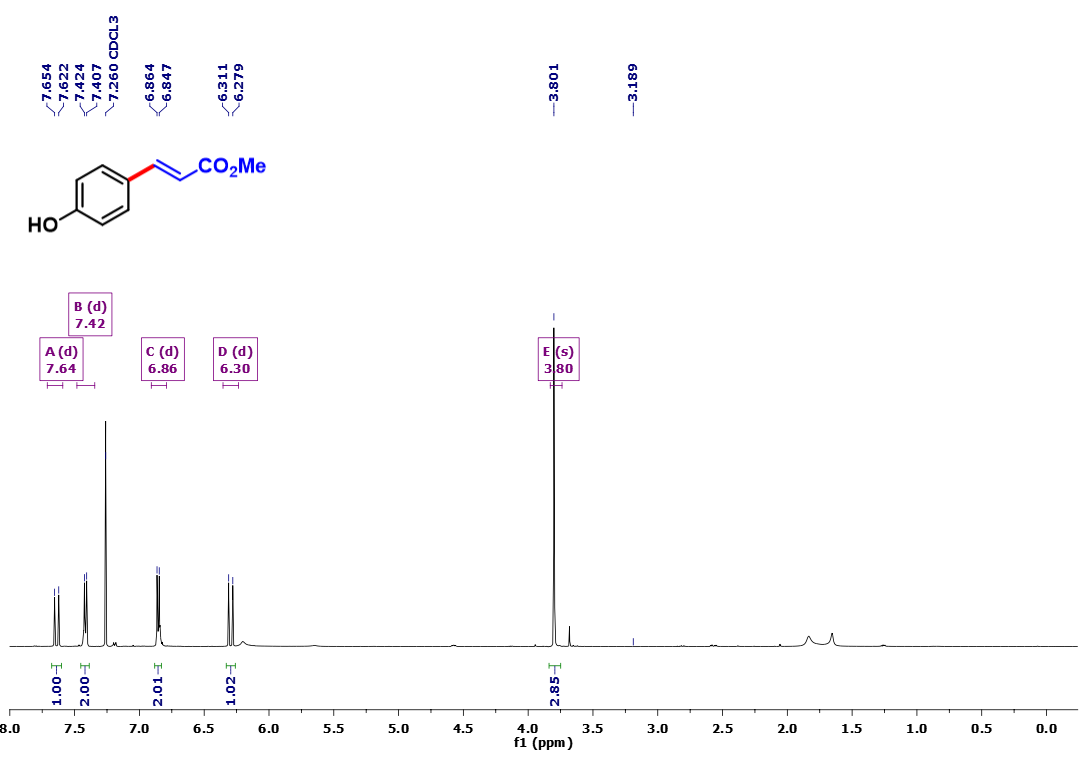


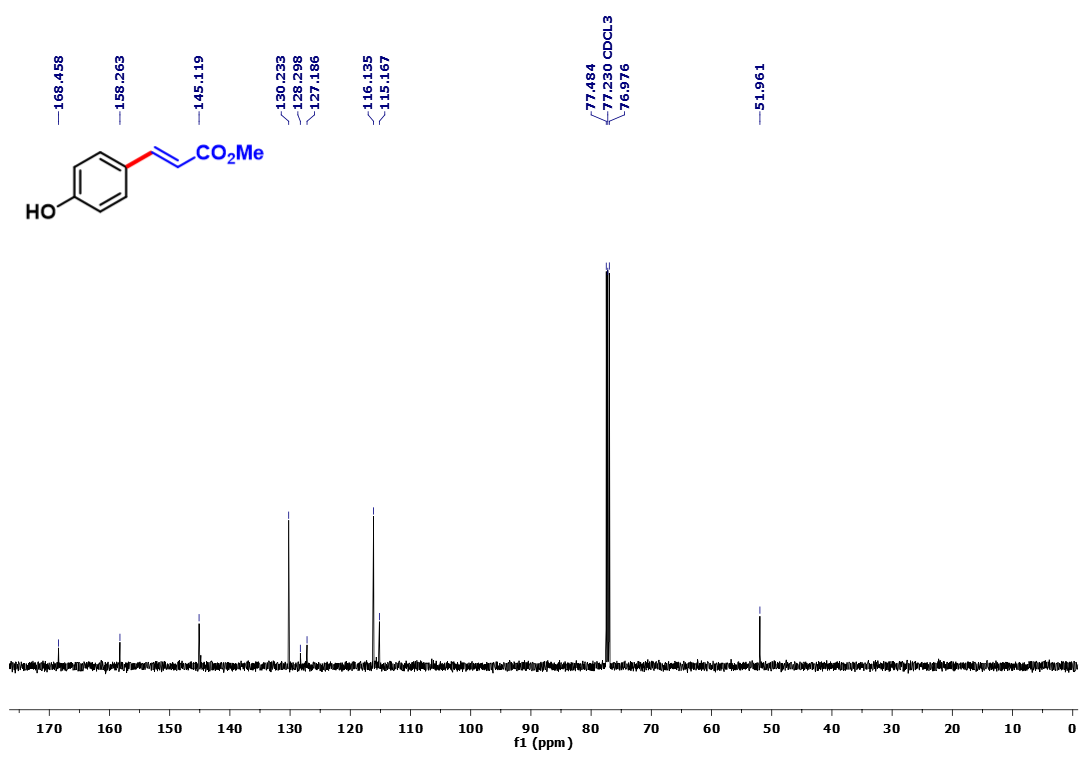


**Methyl (*E*)-3-(3-nitrophenyl)acrylate (18):**


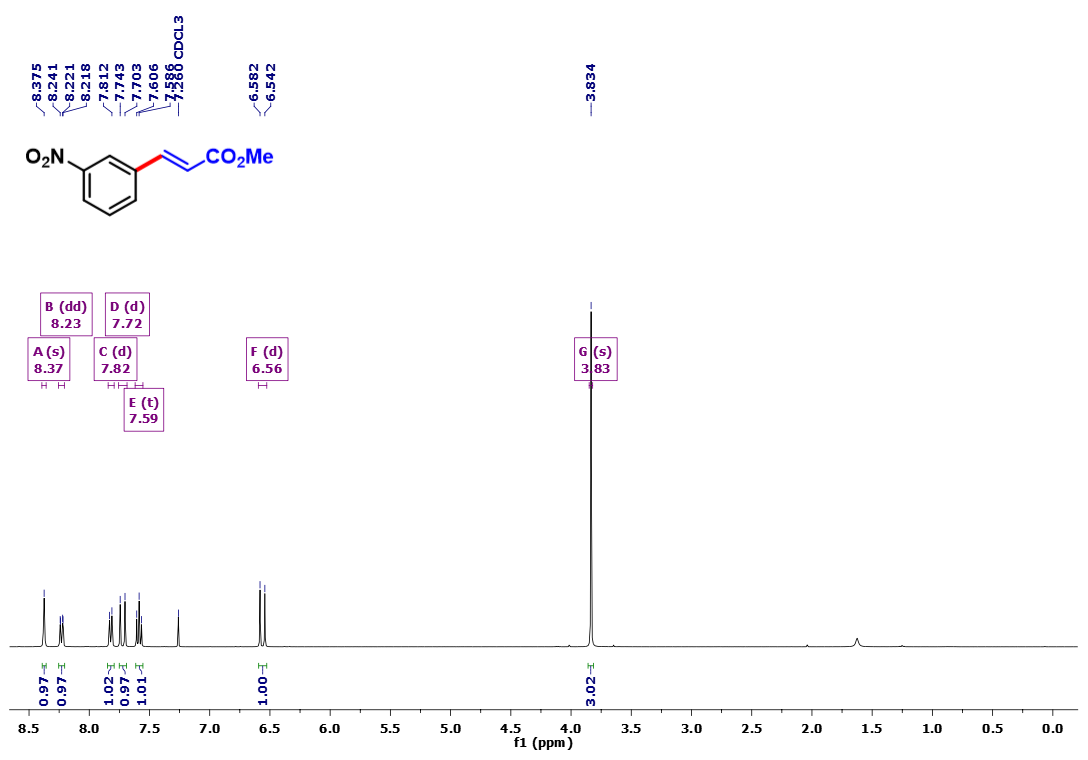


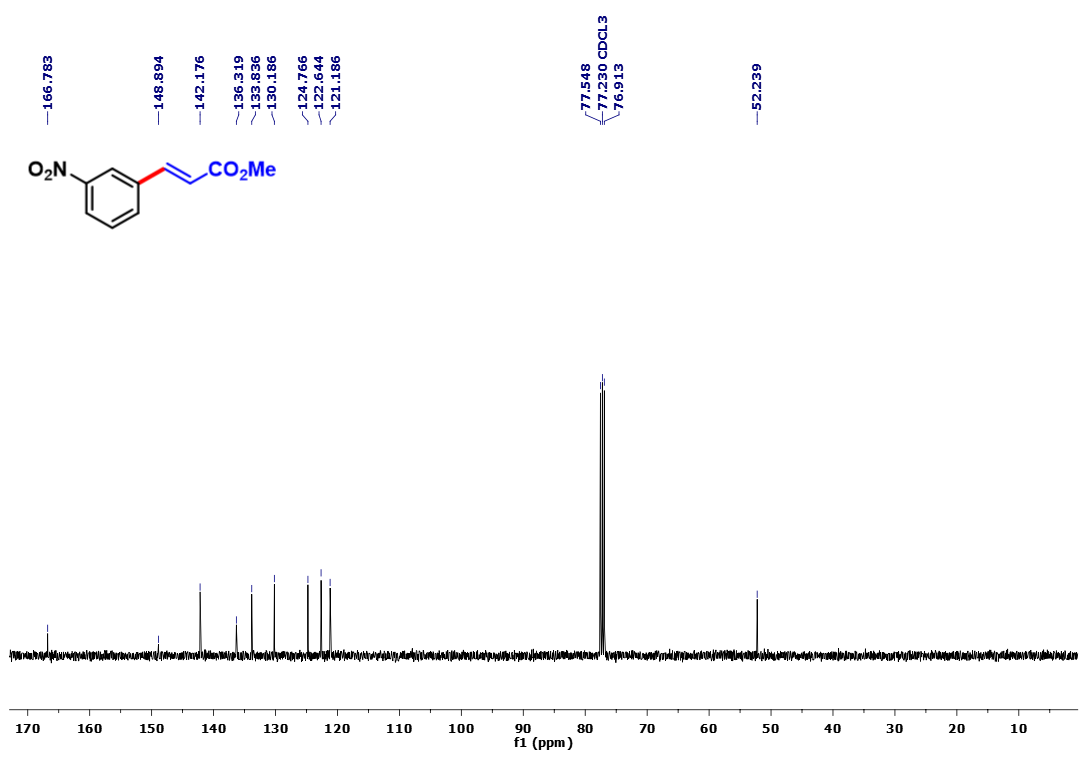


**Methyl (*E*)-3-(3-(trifluoromethyl)phenyl)acrylate (19):**


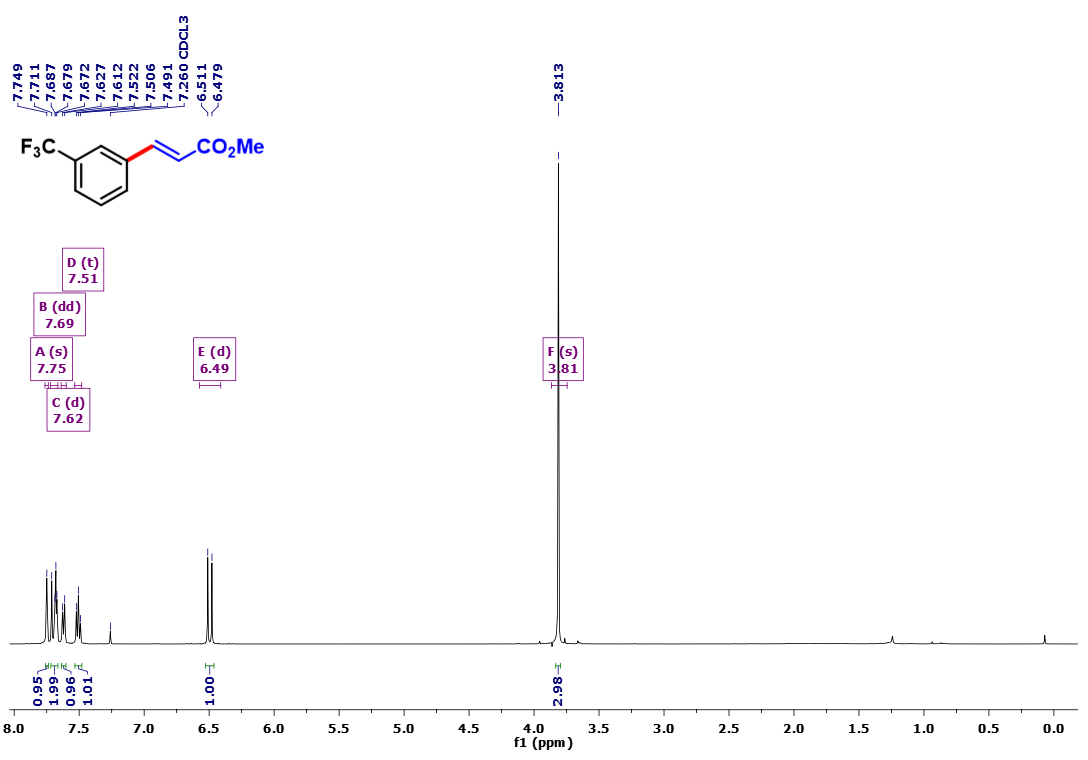


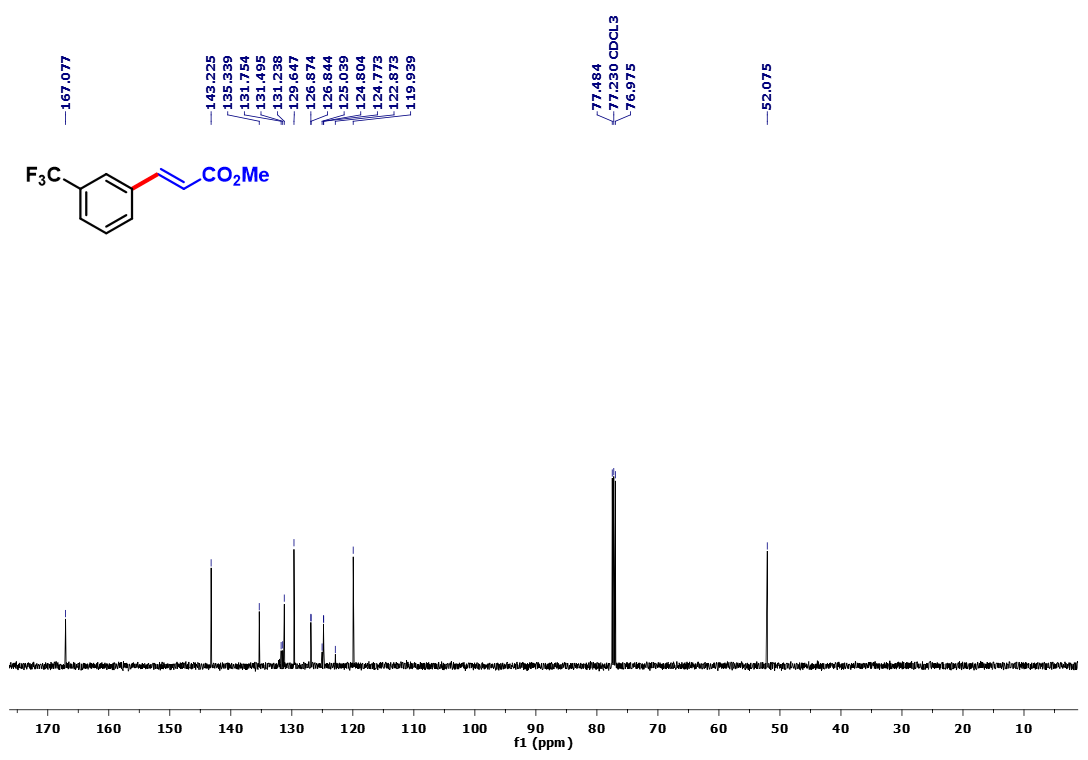


**Ethyl (*E*)-3-(3-formylphenyl)acrylate (20):**


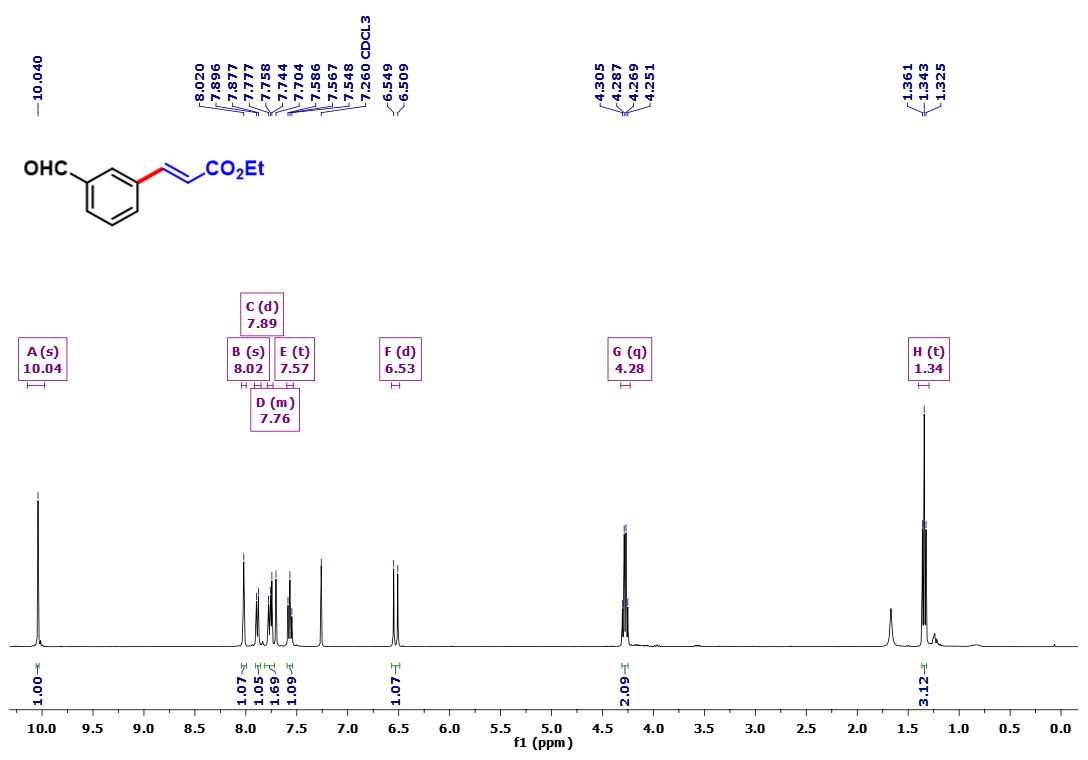


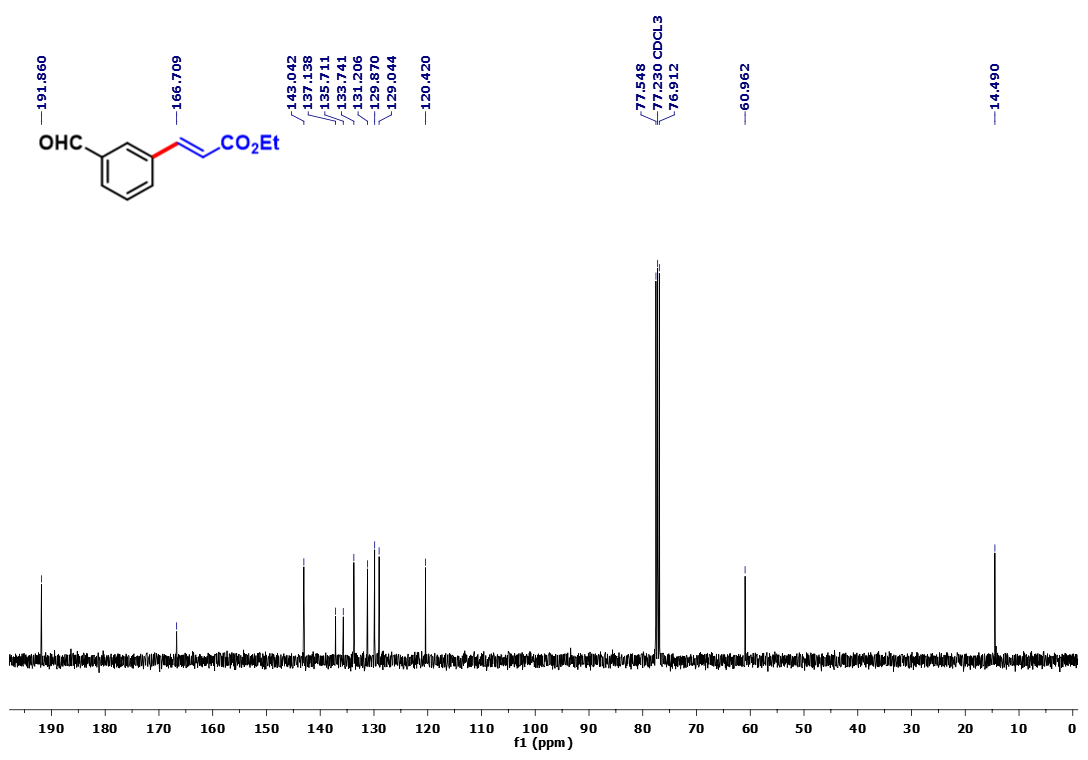


**Ethyl (*E*)-3-(2-fluorophenyl)acrylate (21):**


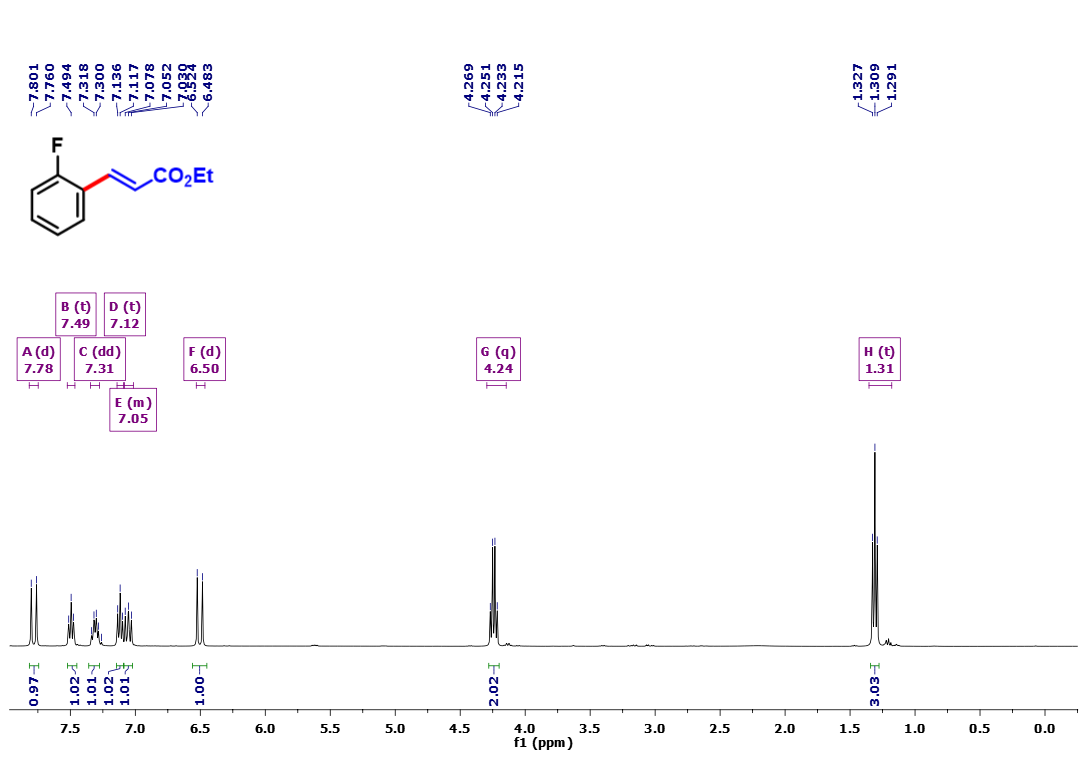


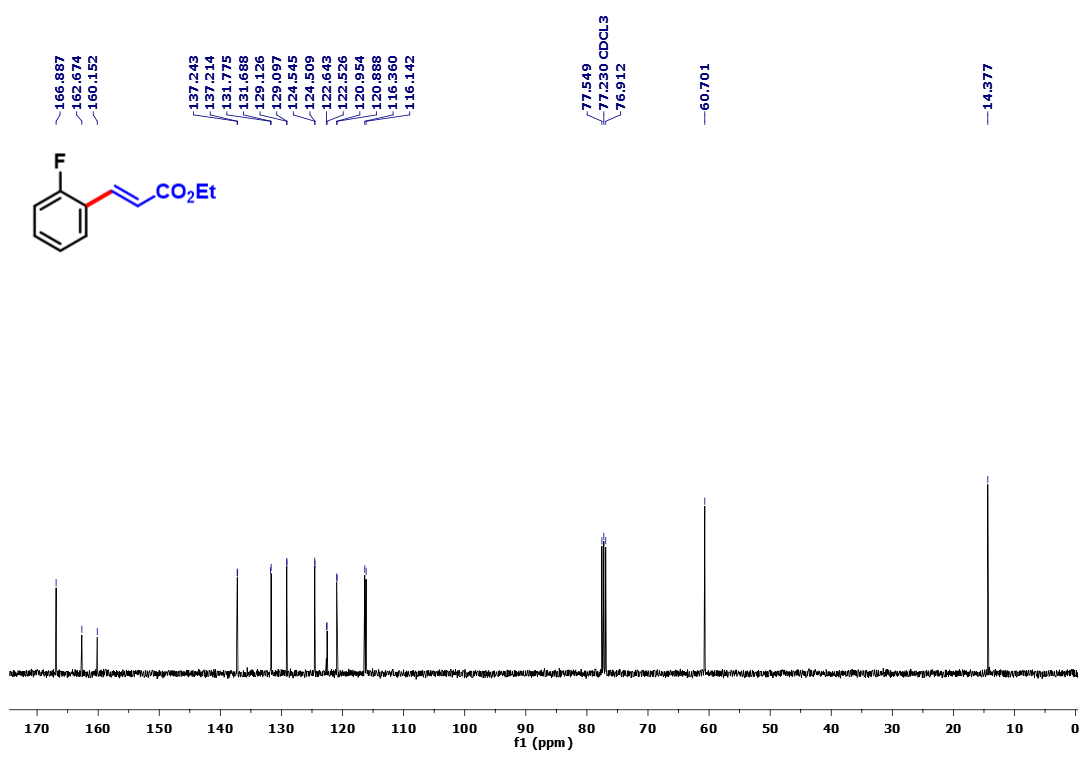


**Methyl (*E*)-5-(3-ethoxy-3-oxoprop-1-en-1-yl)-2-methylbenzoate (22):**


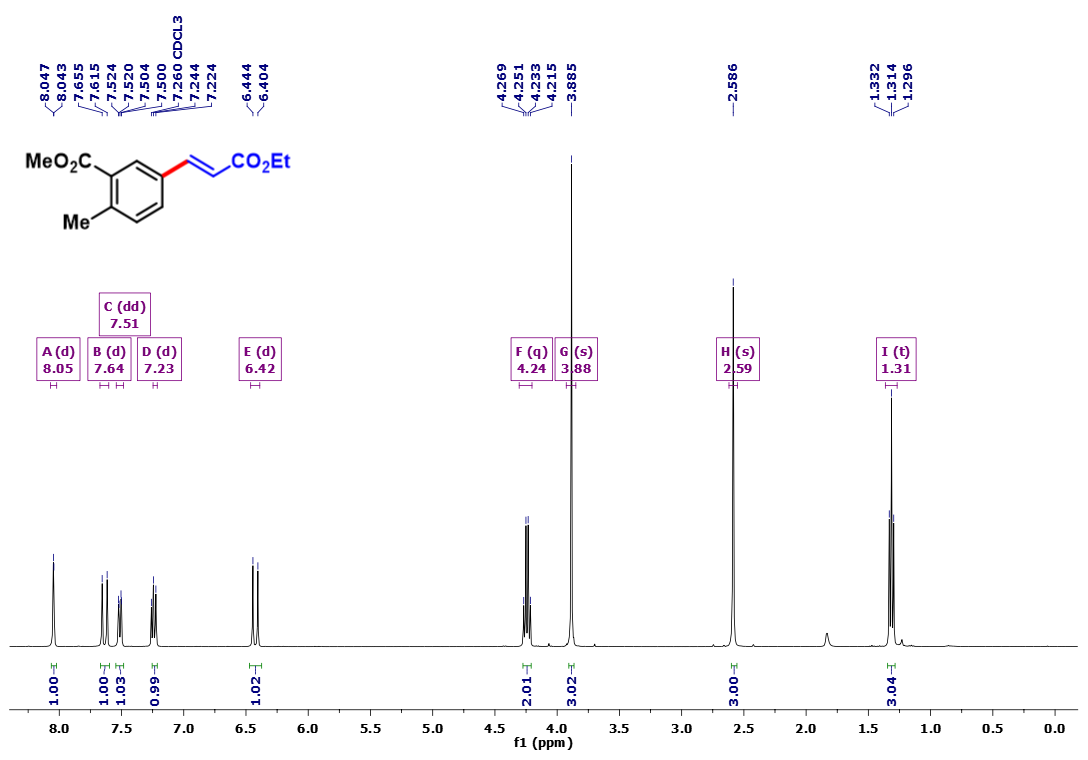


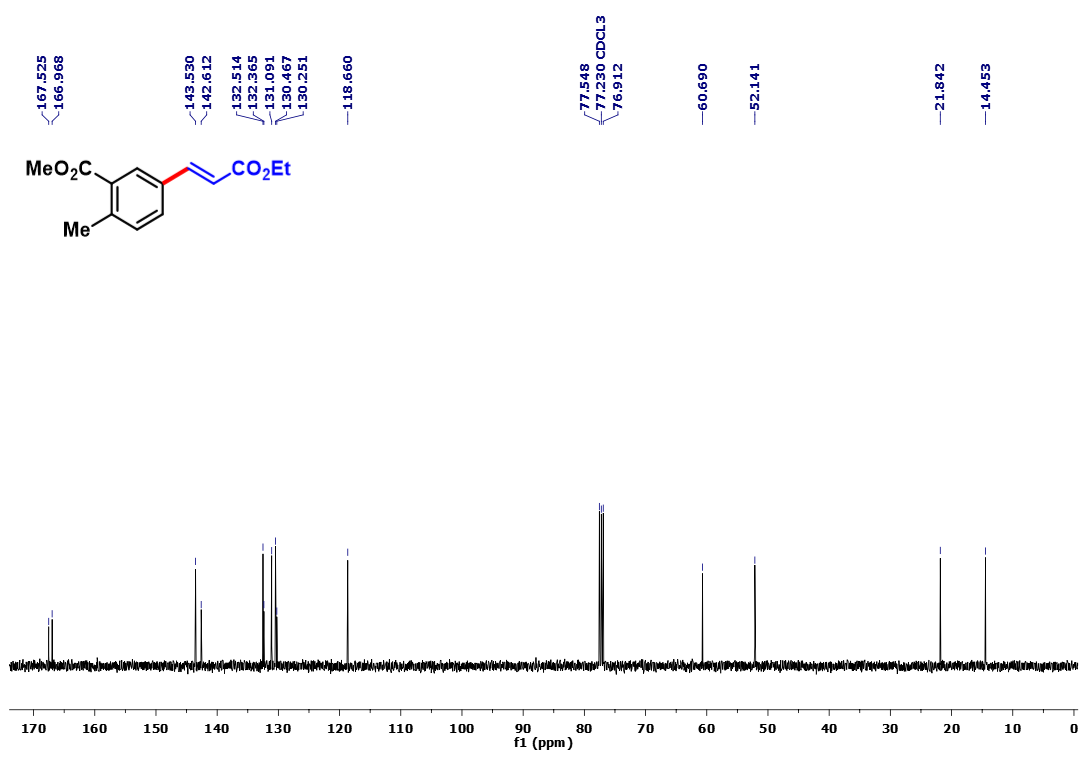


**Ethyl (*E*)-3-(benzo[d][1,3]dioxol-5-yl)acrylate (23):**


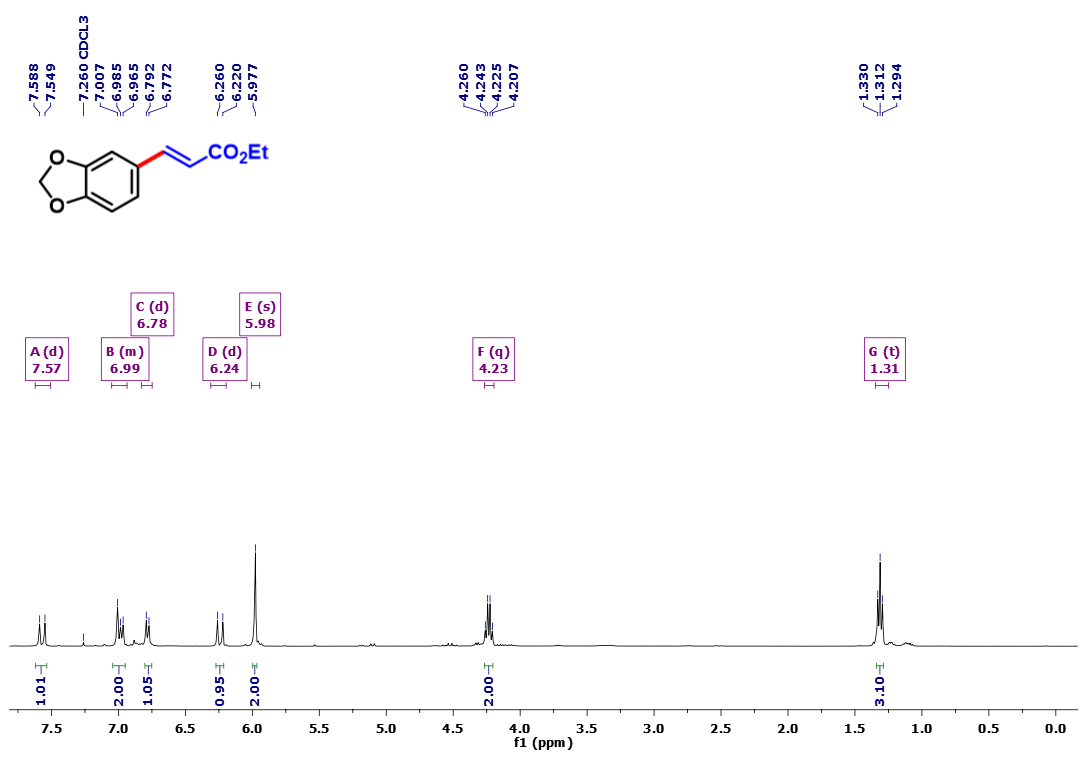


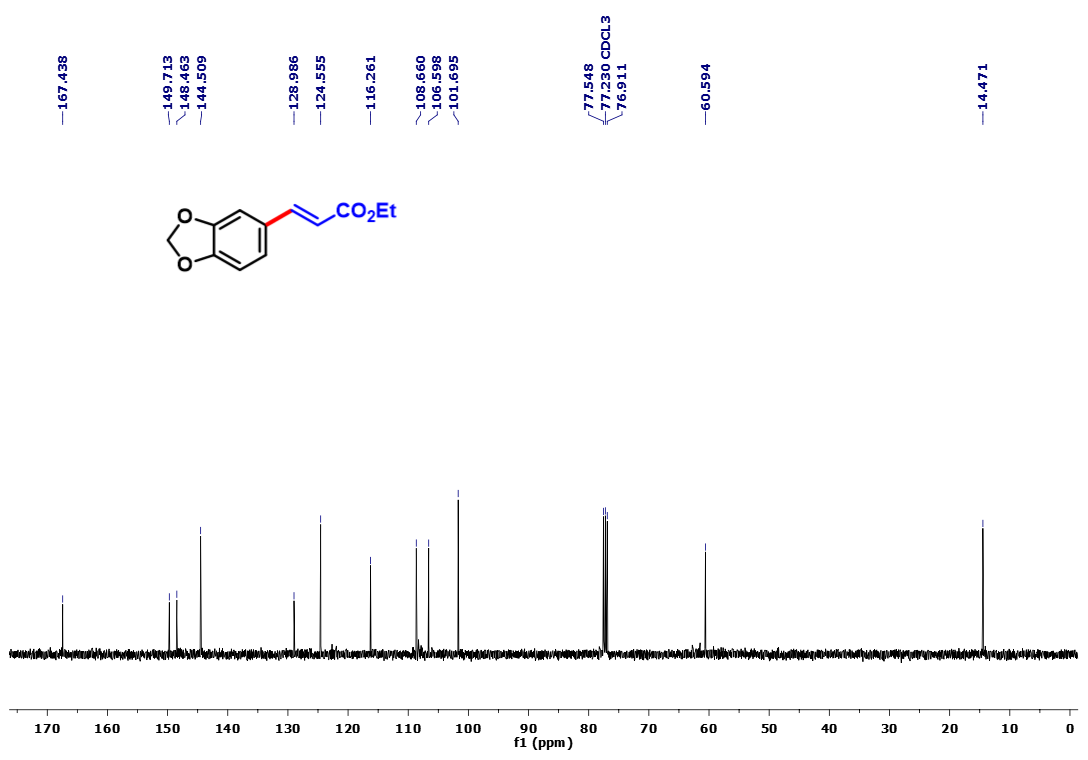


**Methyl (*E*)-2-(3-ethoxy-3-oxoprop-1-en-1-yl)-5-methylbenzoate (24):**


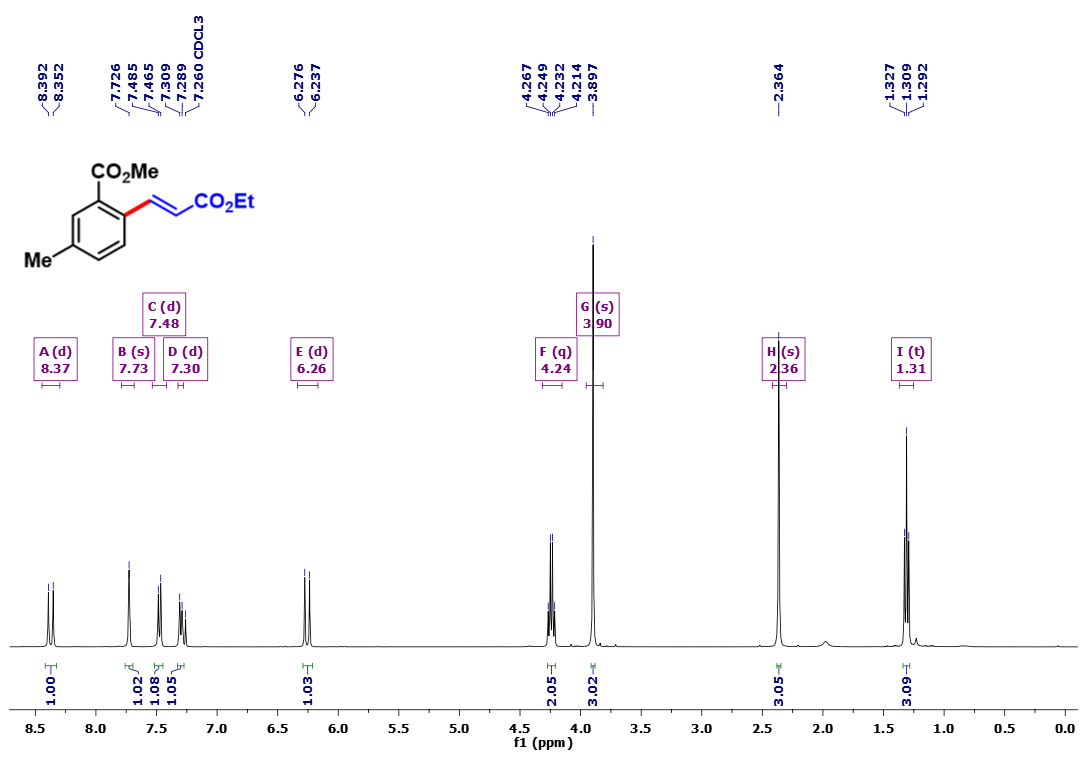


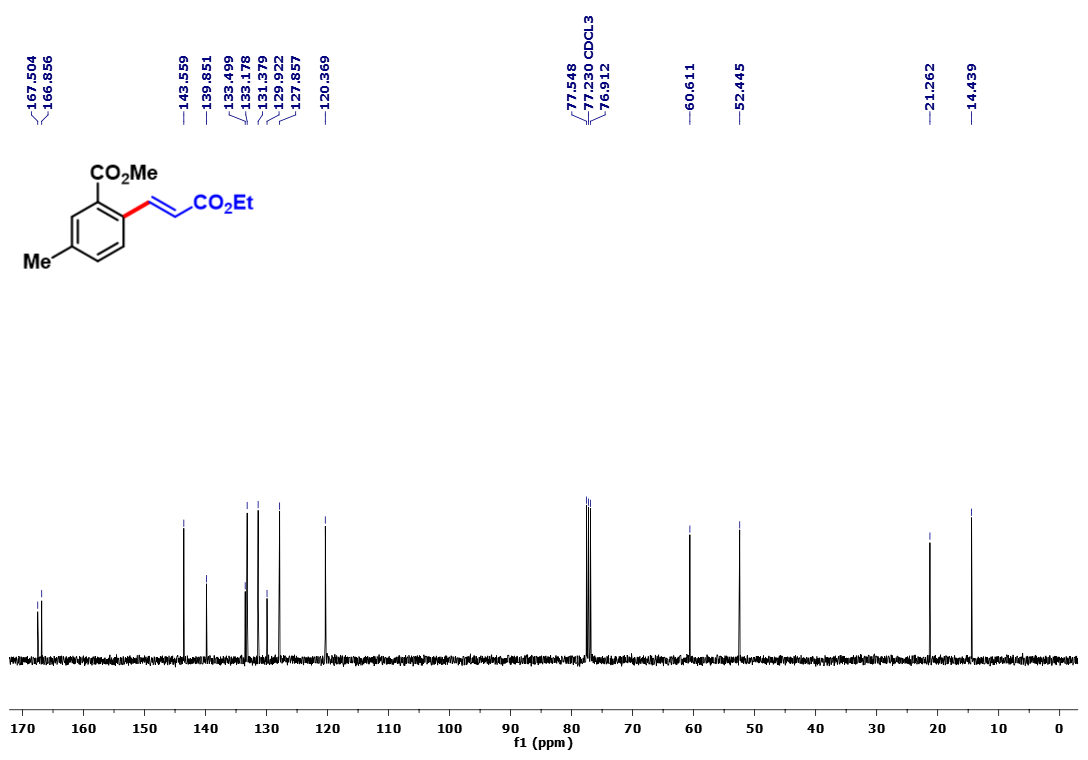


**Ethyl (*E*)-3-(5-cyano-2-methylphenyl)acrylate (25):**


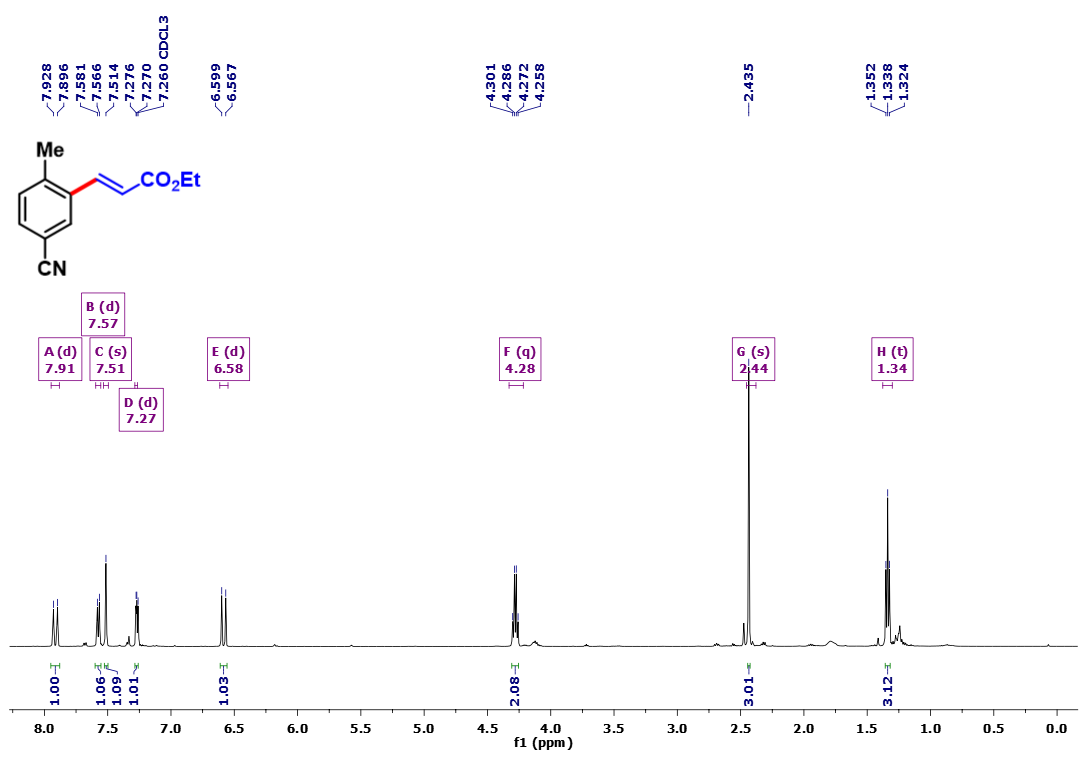


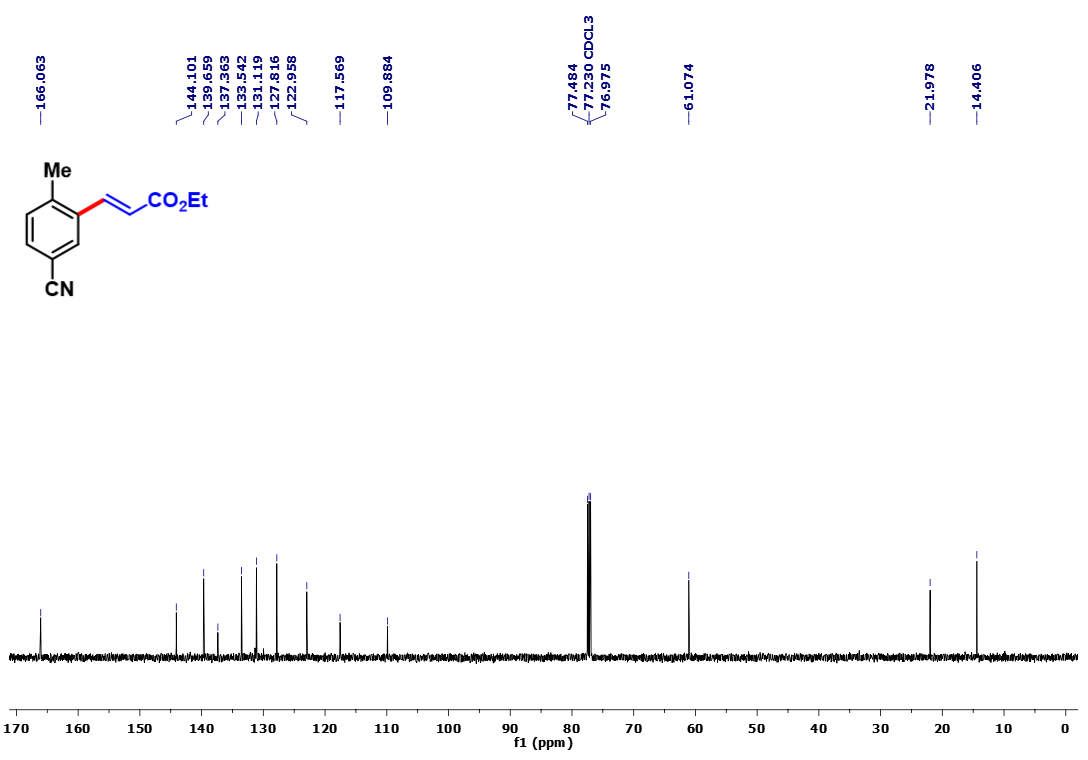


**Ethyl (*E*)-3-(naphthalen-2-yl)acrylate (26):**


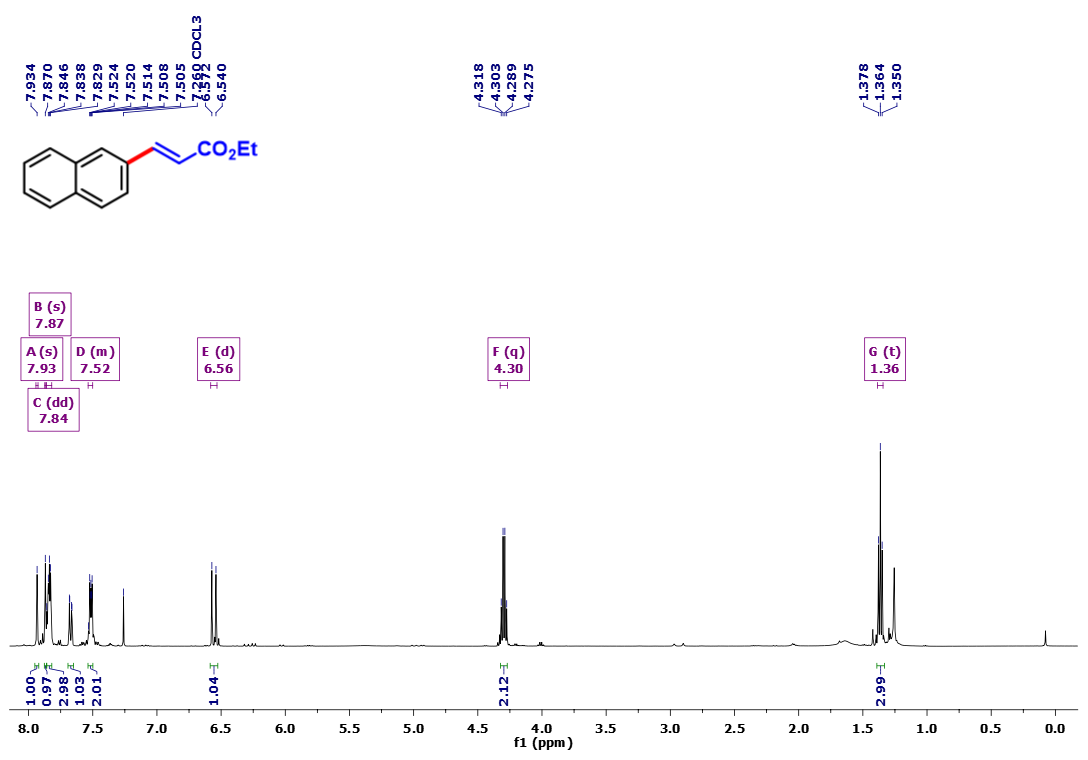


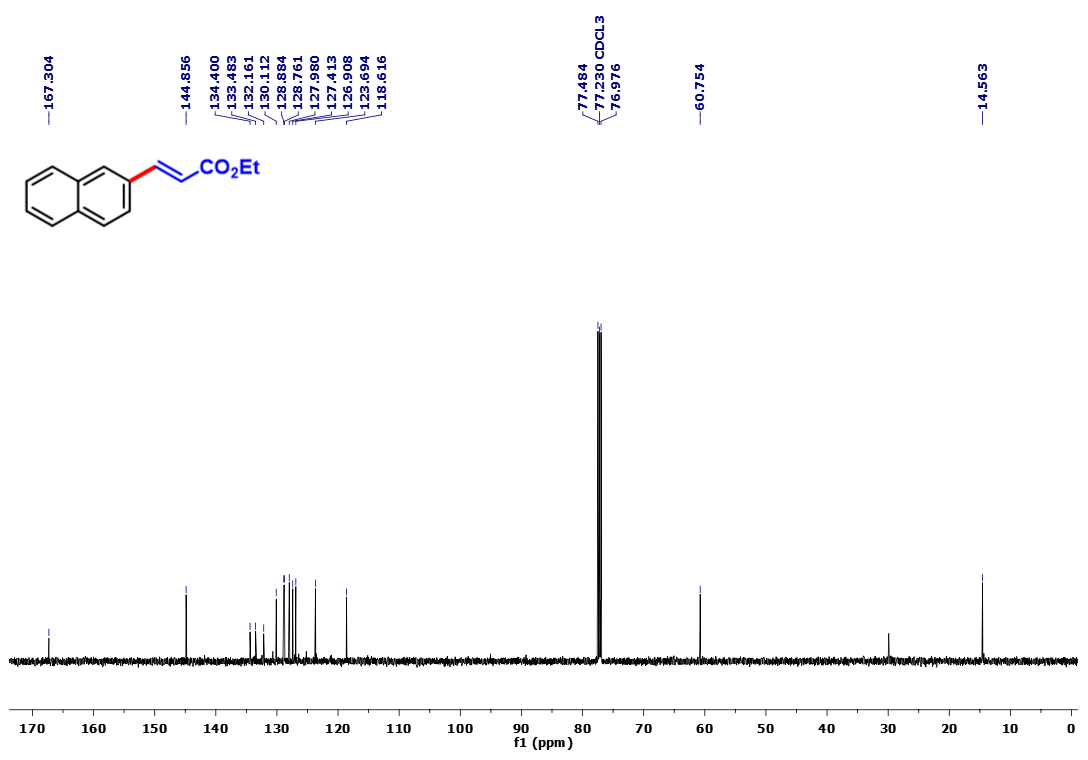


**1-(Methoxycarbonyl)-7-[(1E)-3-methoxy-3-oxo-1-propenyl]-ferrocene (27):**


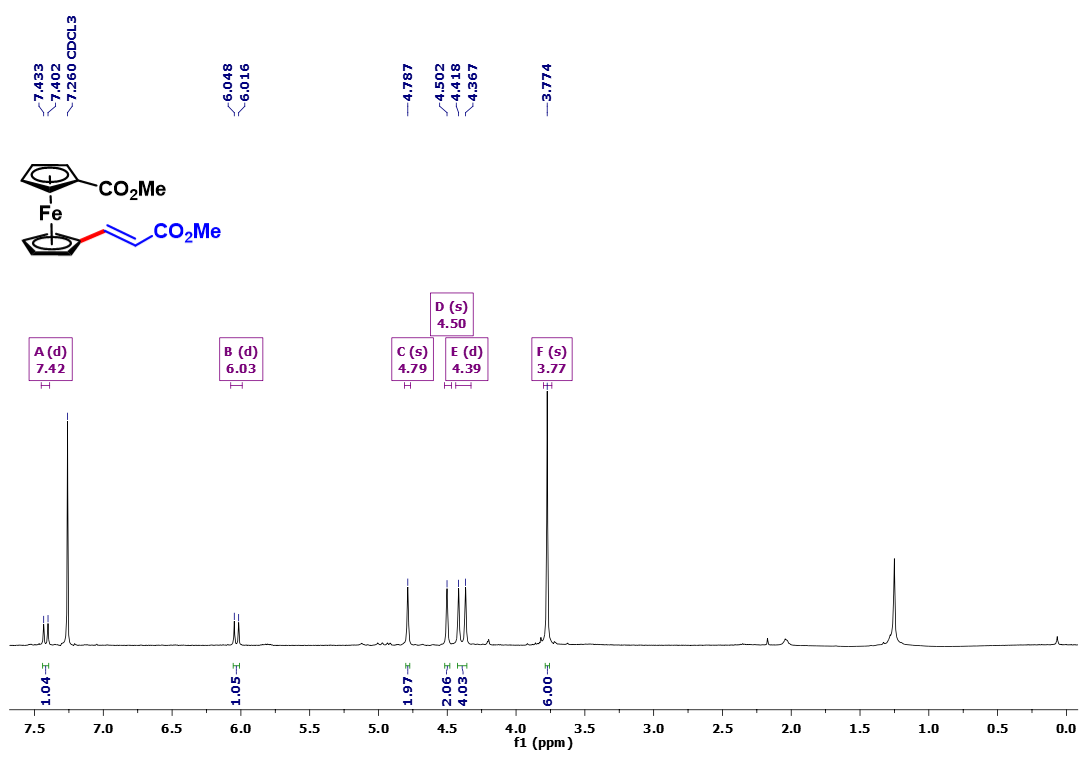


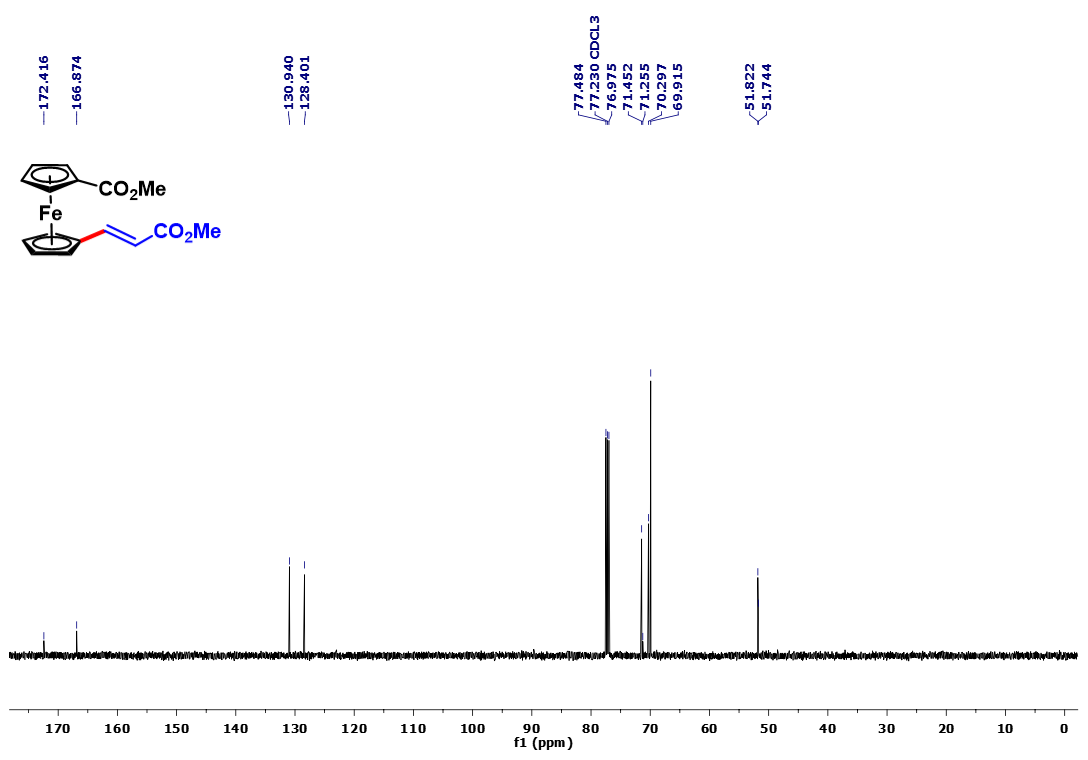


**Methyl (*E*)-3-(thiophen-3-yl)acrylate (28):**


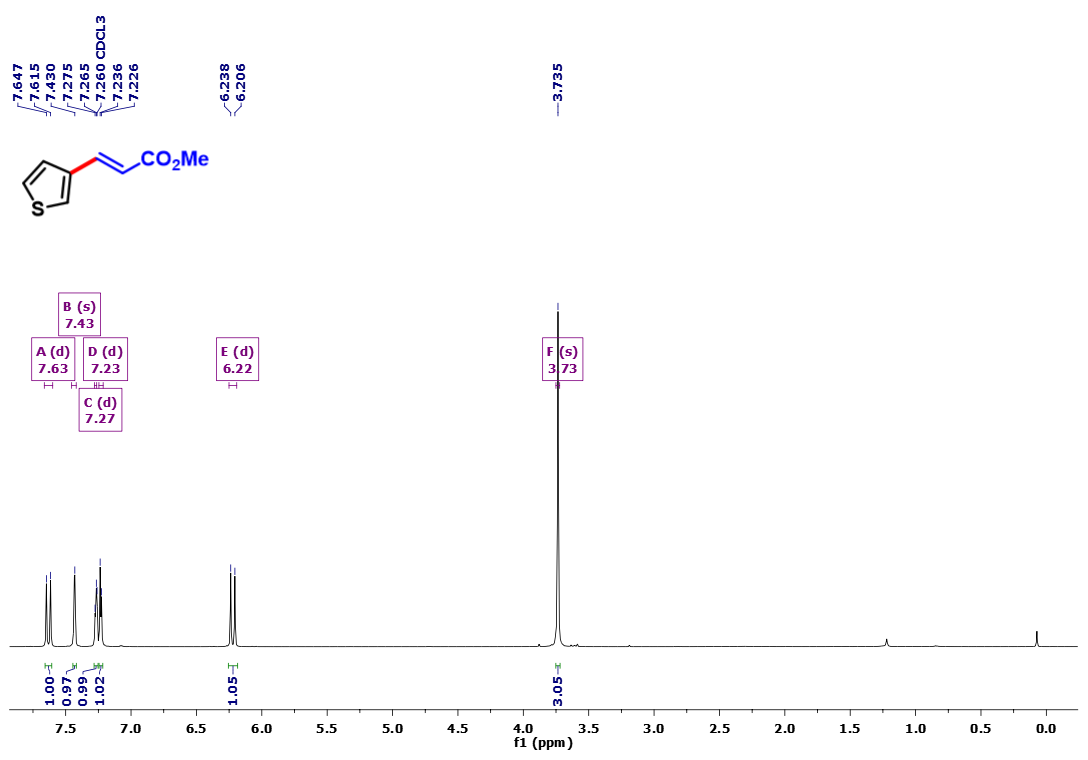


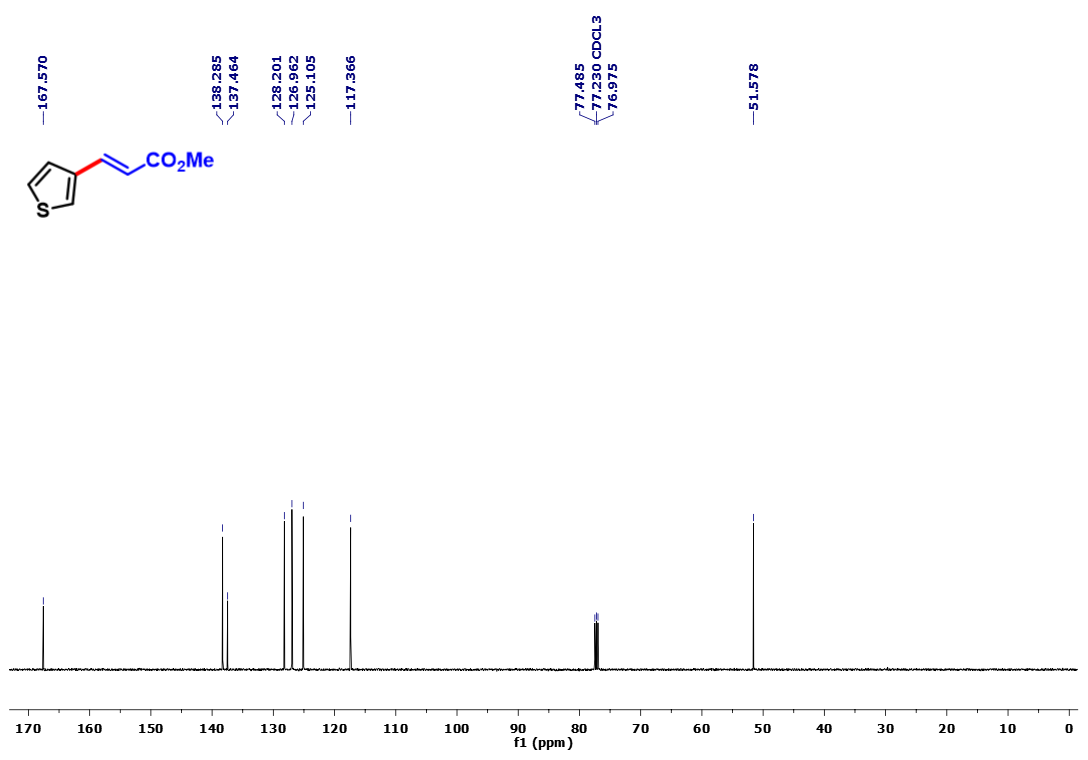


**Methyl (*E*)-3-(thiophen-3-yl)acrylate (29):**


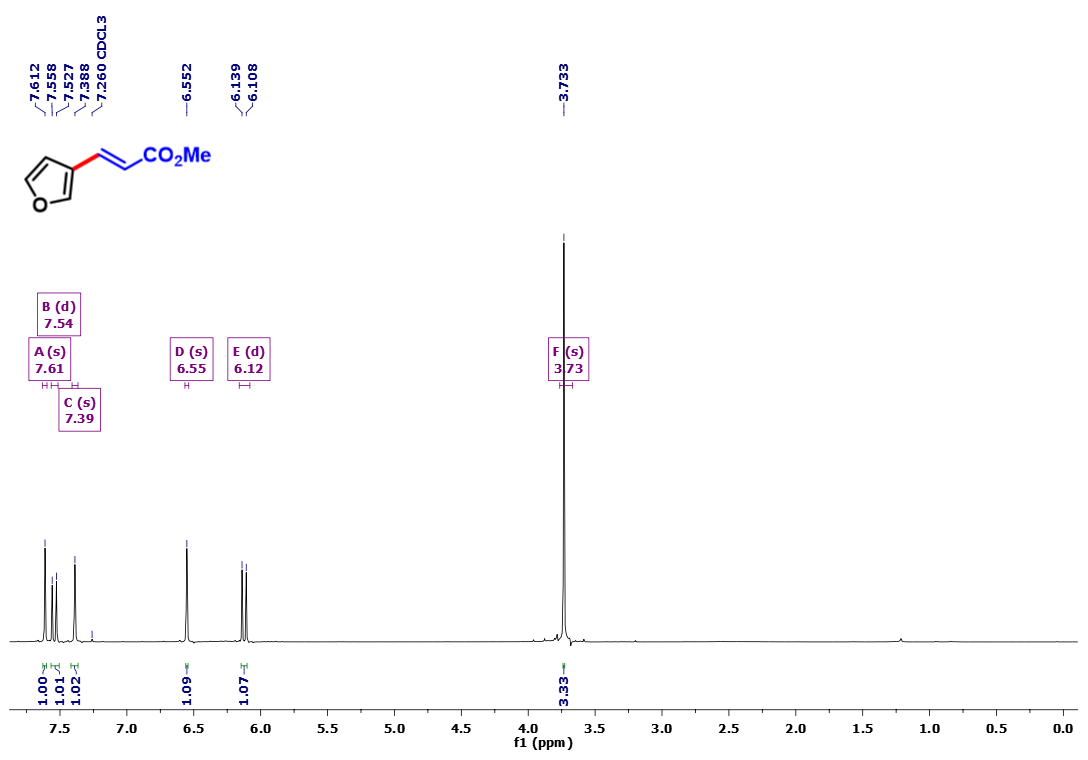


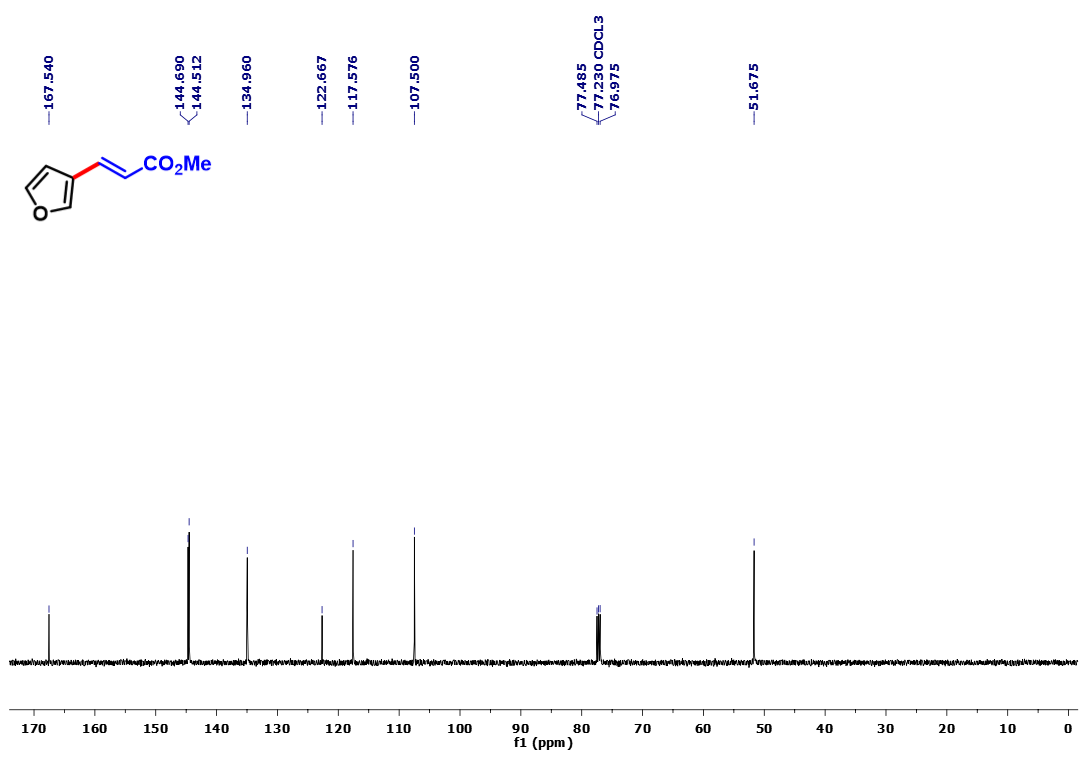


**Ethyl (*E*)-3-(5-formylfuran-2-yl)acrylate (30):**


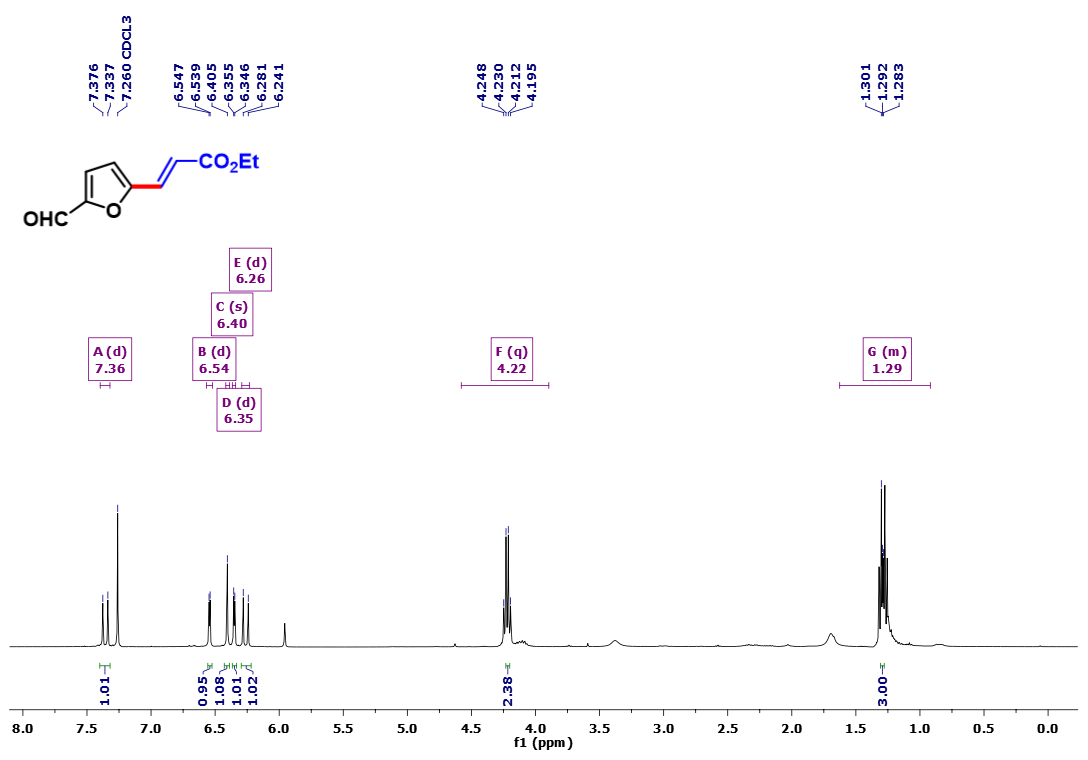


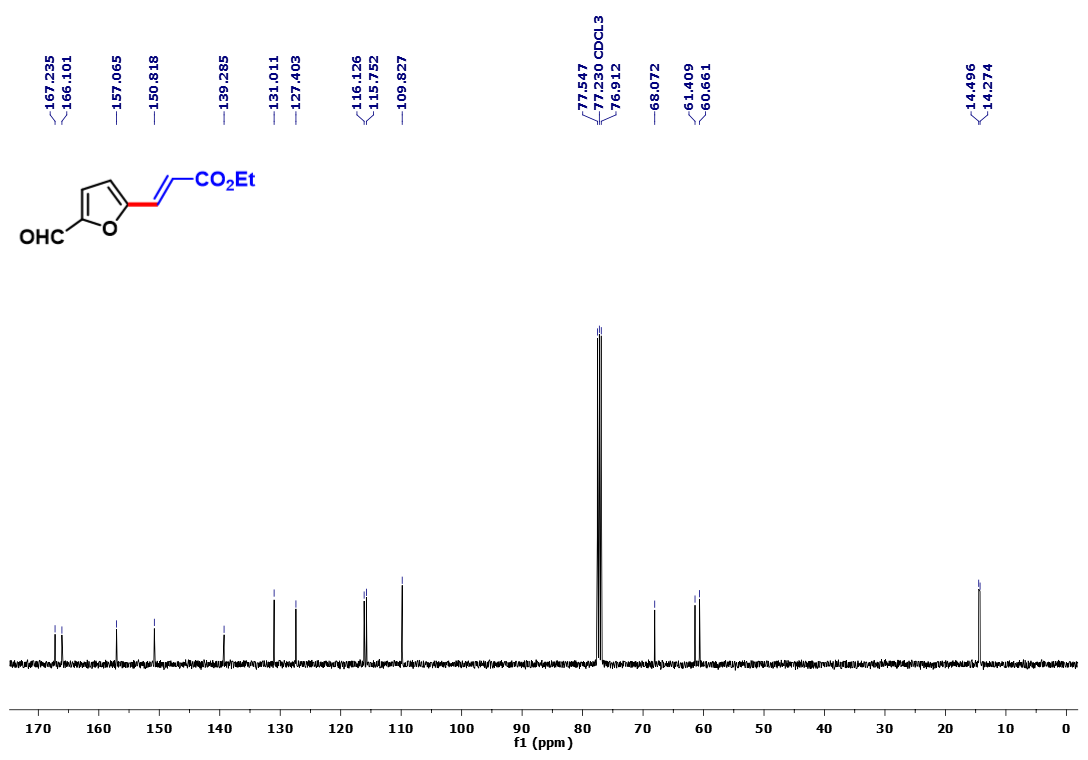


**Ethyl (*E*)-3-(5-acetylthiophen-2-yl)acrylate (31):**


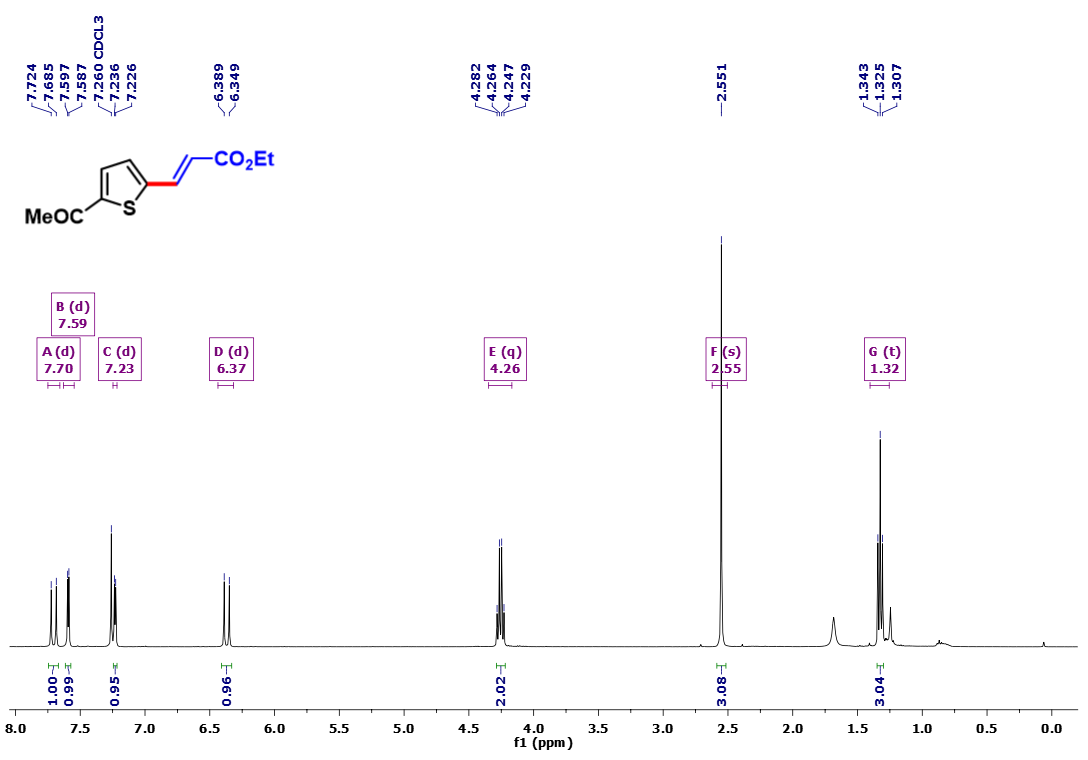


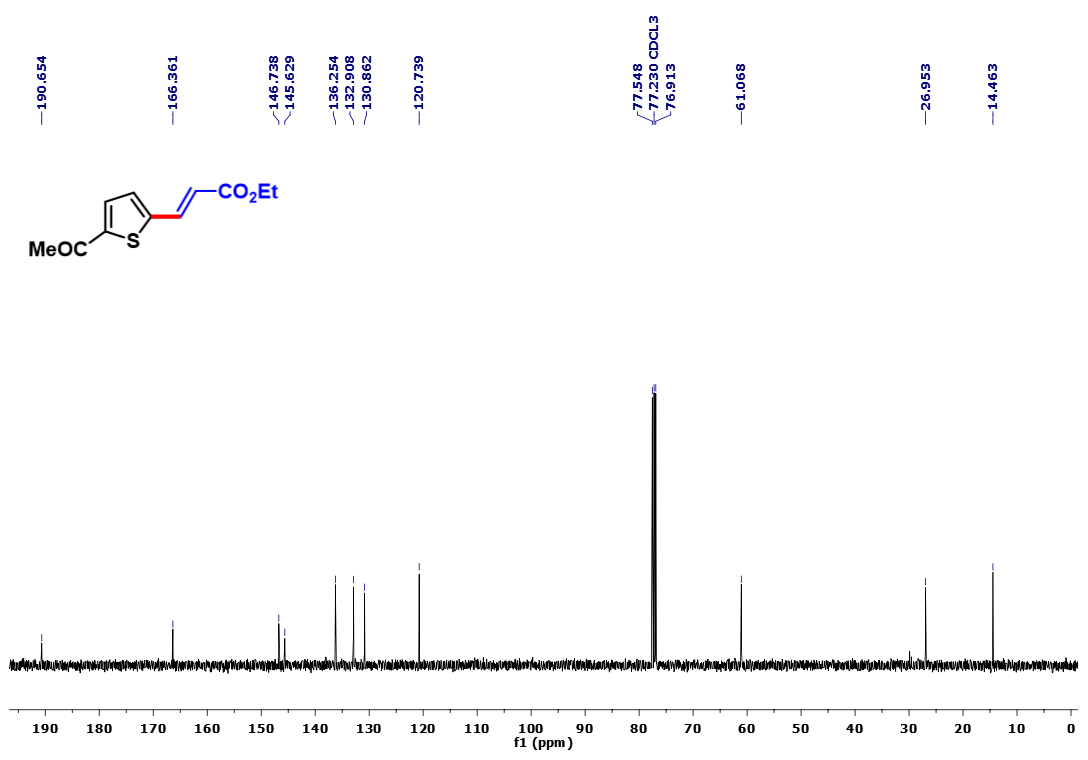


**Methyl (*E*)-3-(4-bromothiophen-2-yl)acrylate (32):**


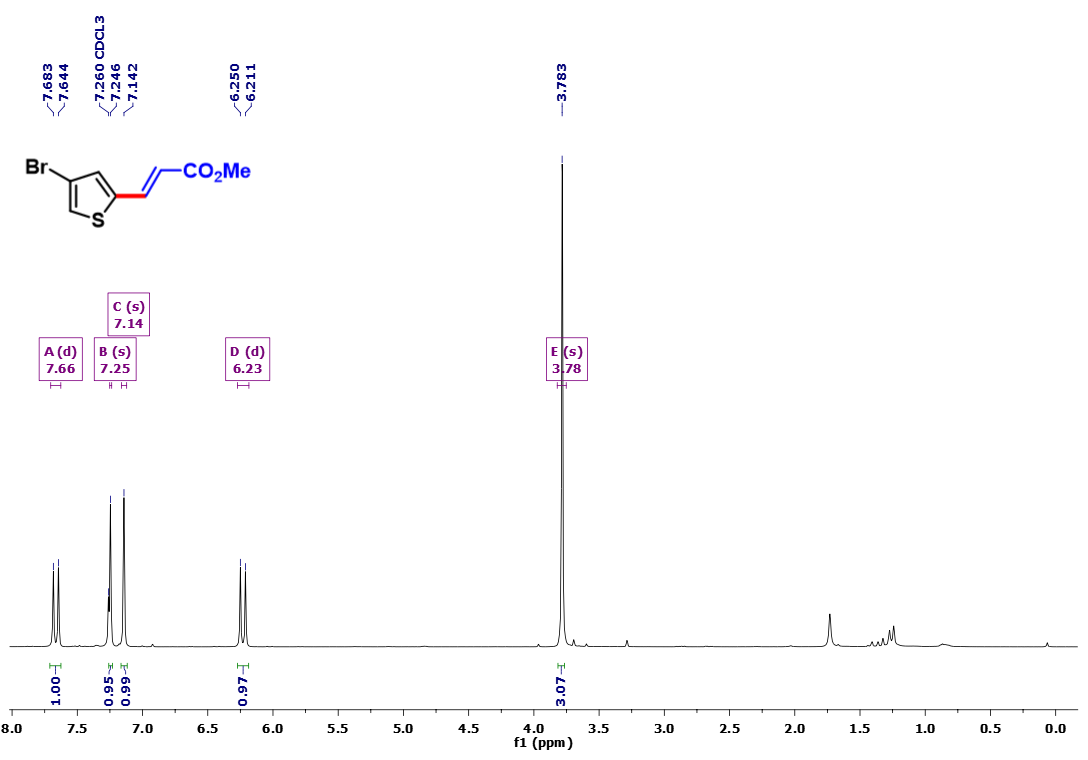


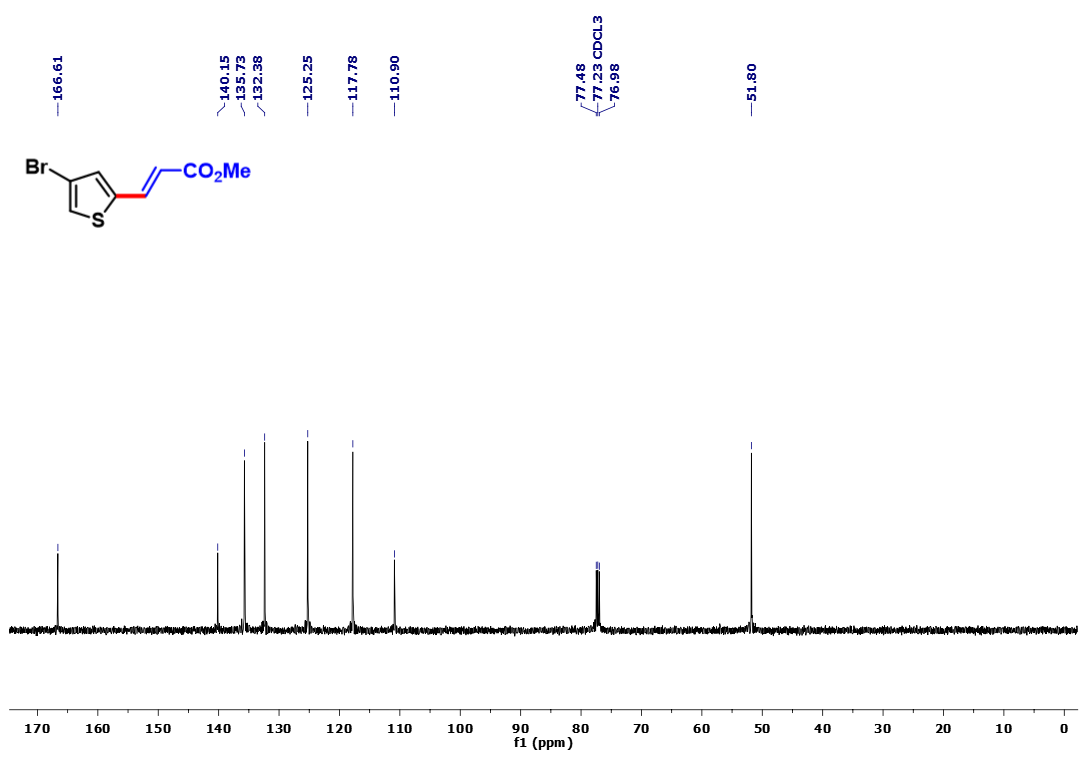


**Methyl (*E*)-3-(1*H*-imidazol-5-yl)acrylate (33):**


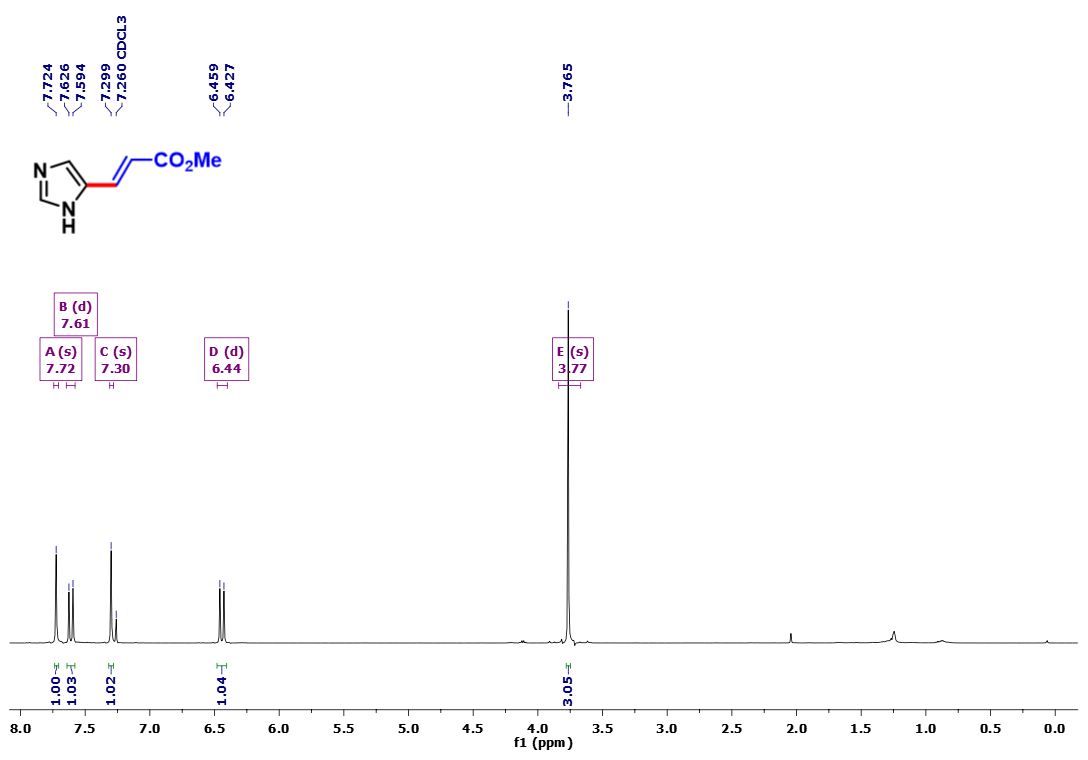


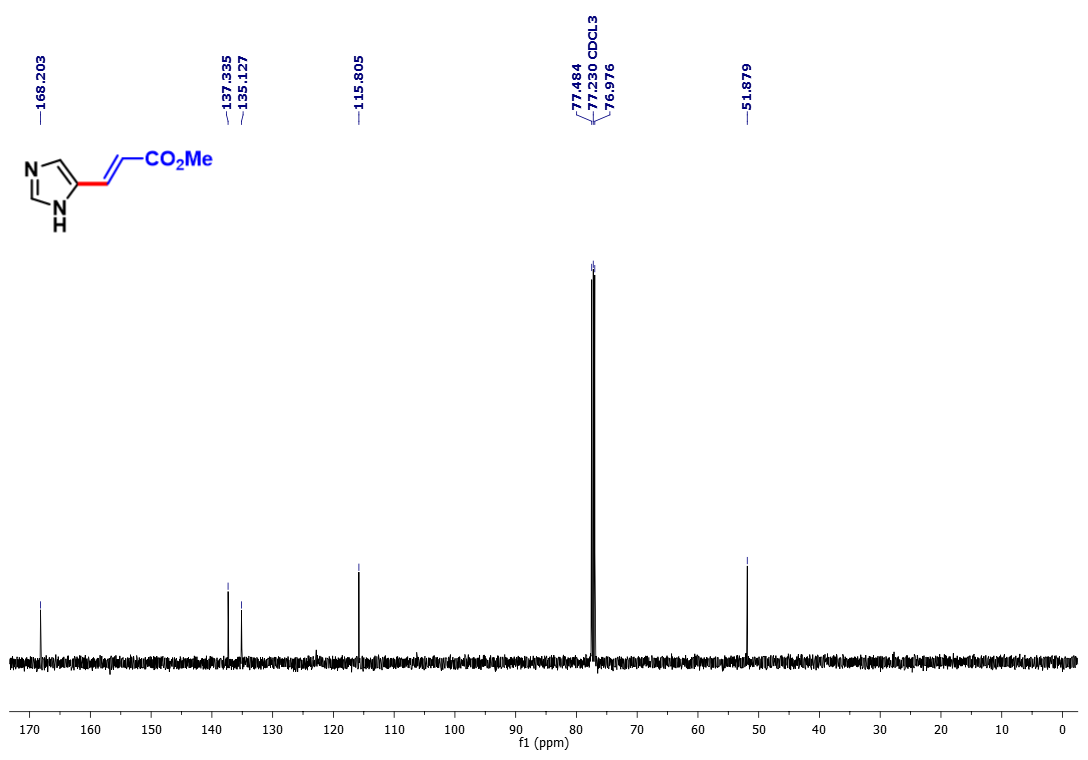


**Methyl (*E*)-3-(pyridin-3-yl)acrylate (34):**


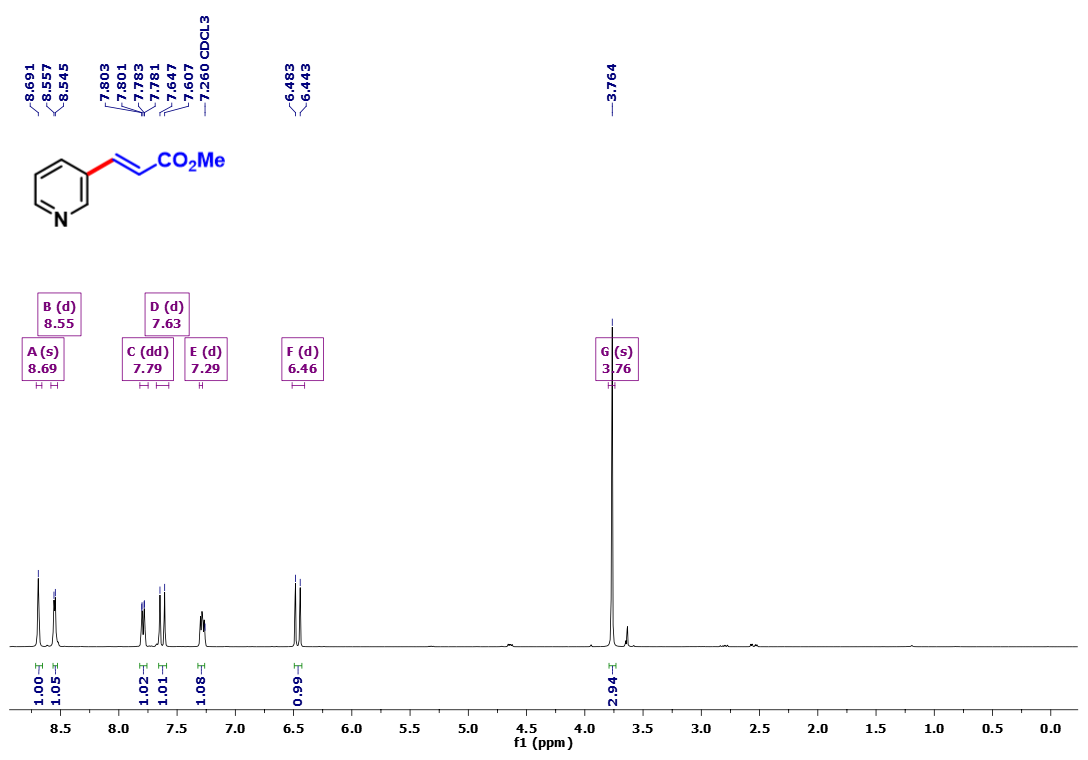


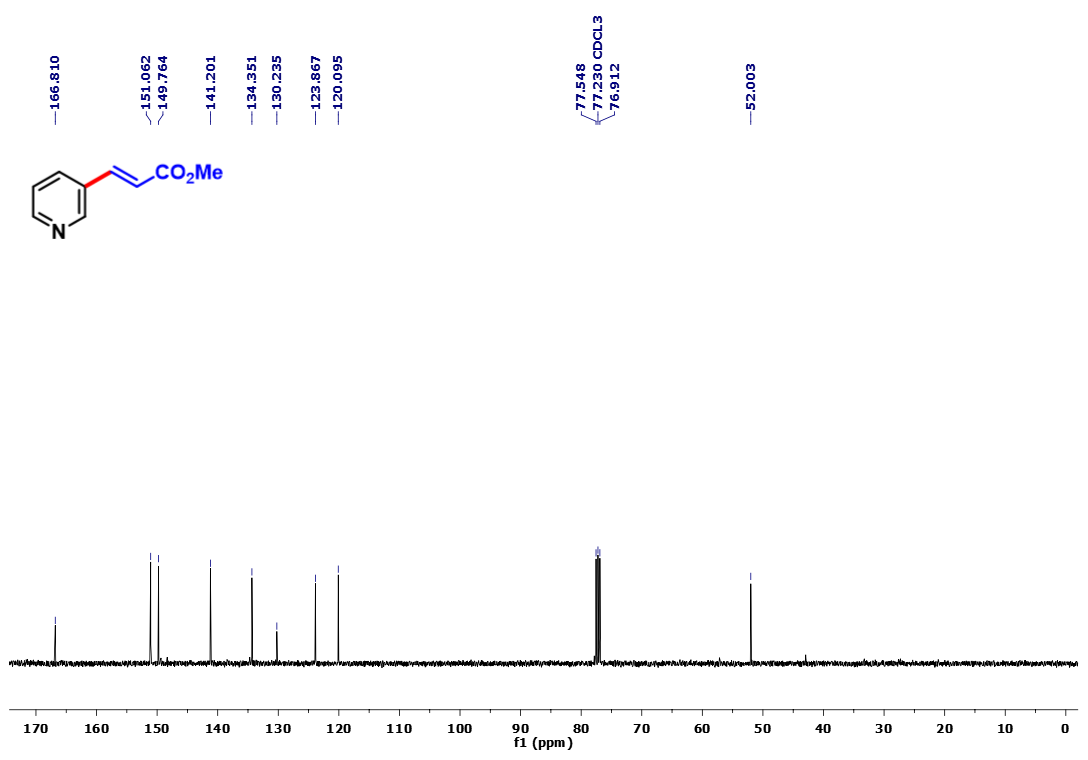


**Ethyl (*E*)-3-(pyridin-3-yl)acrylate (35):**


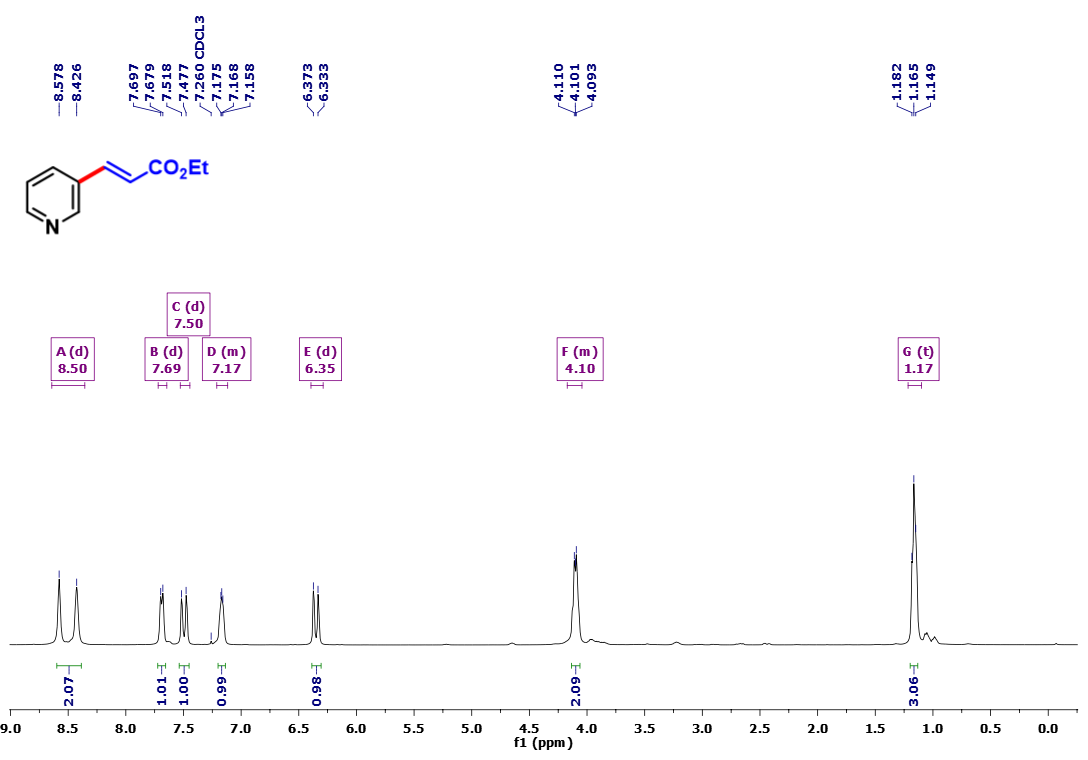


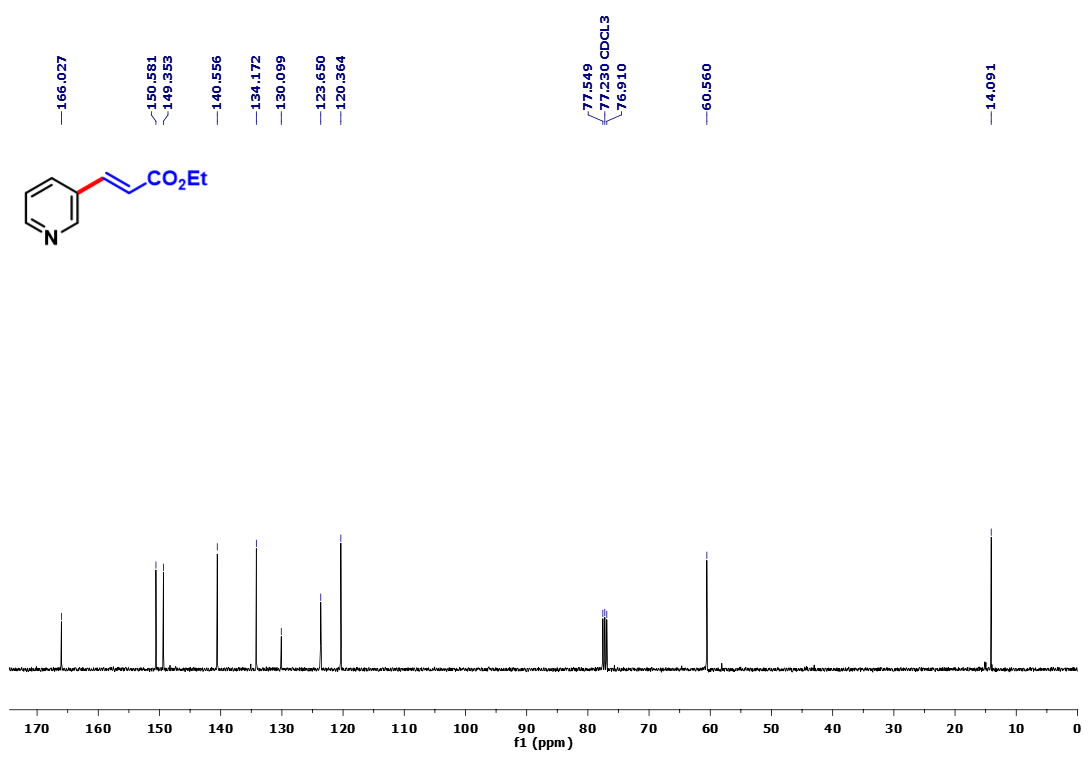


**Butyl (*E*)-3-(pyridin-3-yl)acrylate (36):**


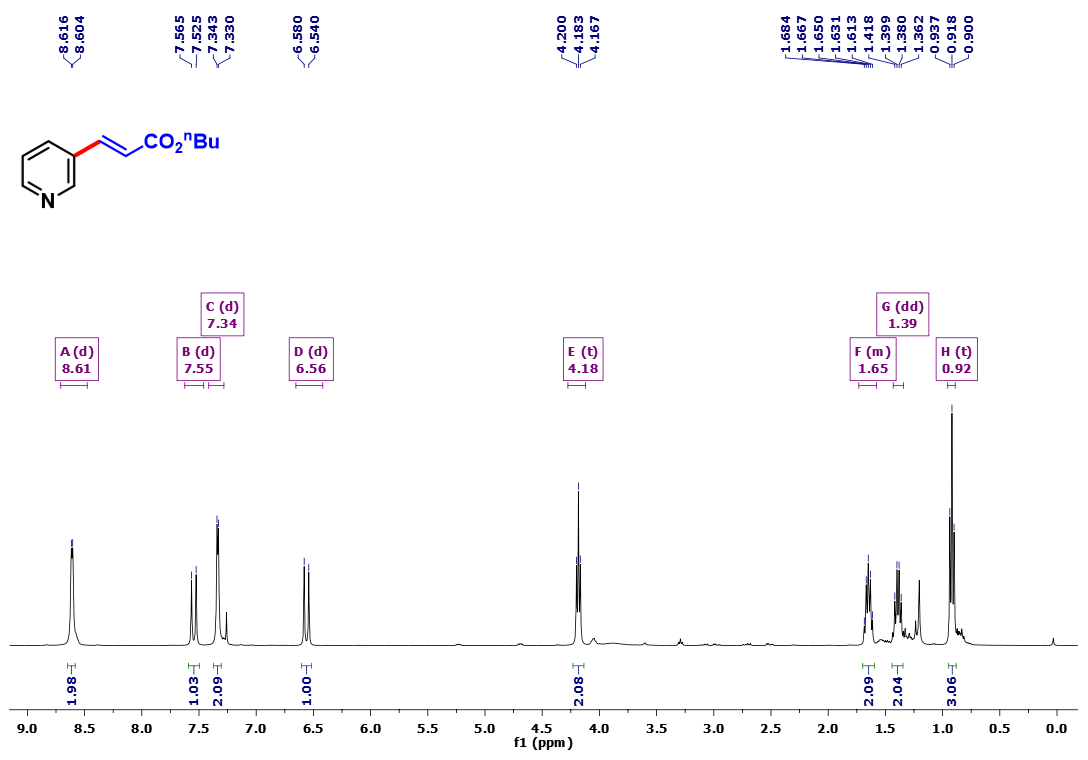


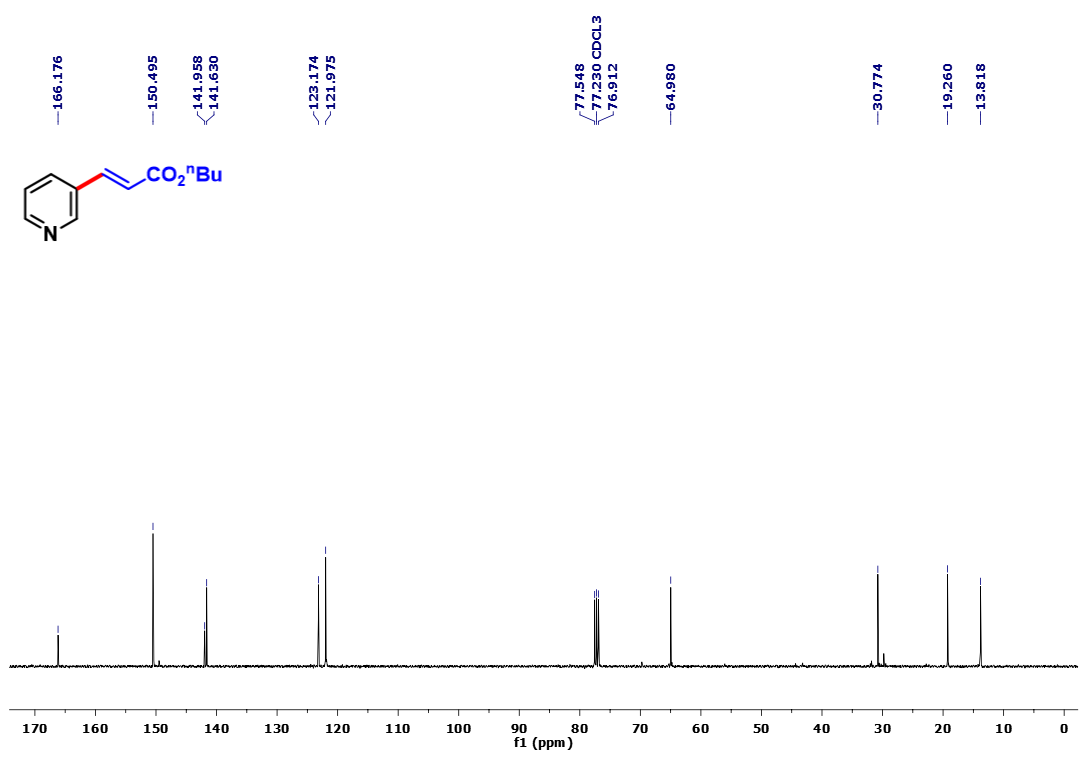


**Ethyl (*E*)-3-(pyrimidin-2-yl)acrylate (37):**


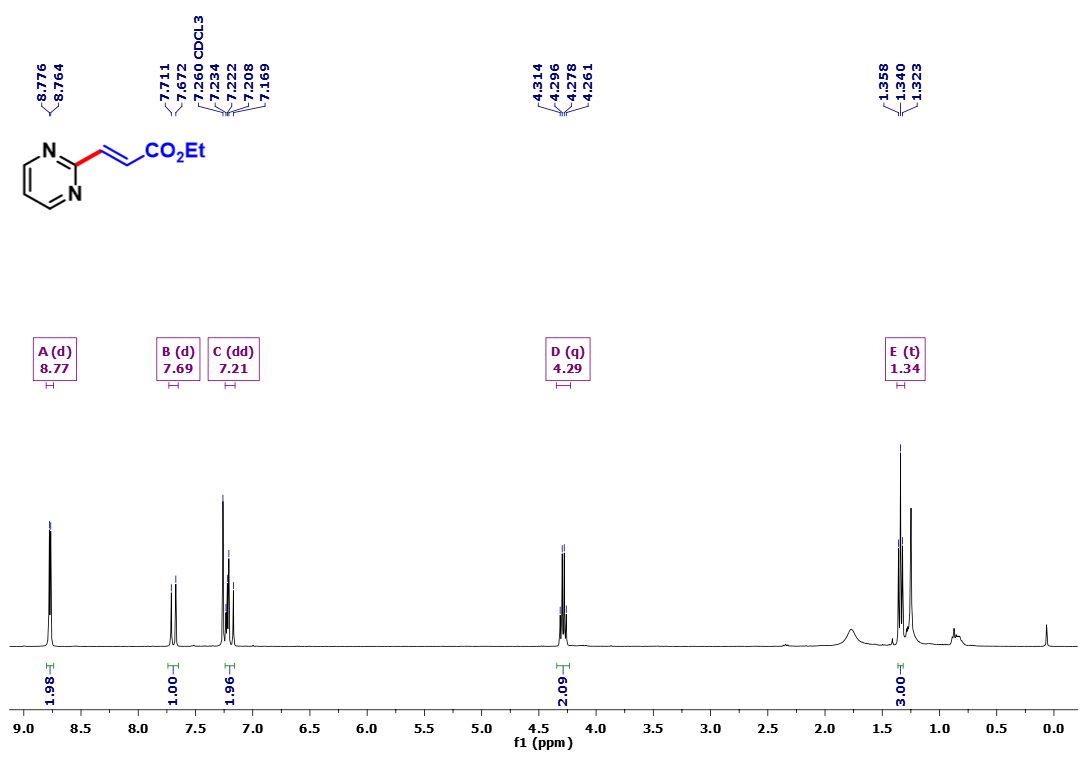


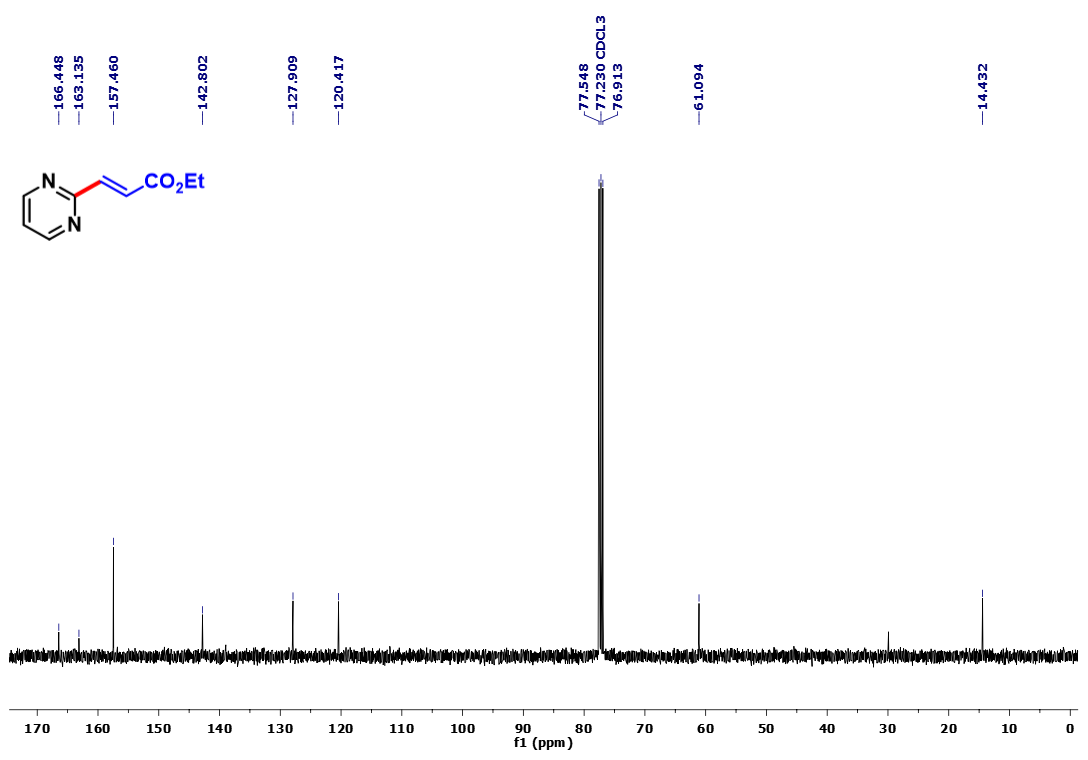


**Ethyl (*E*)-3-(quinolin-3-yl)acrylate (38):**


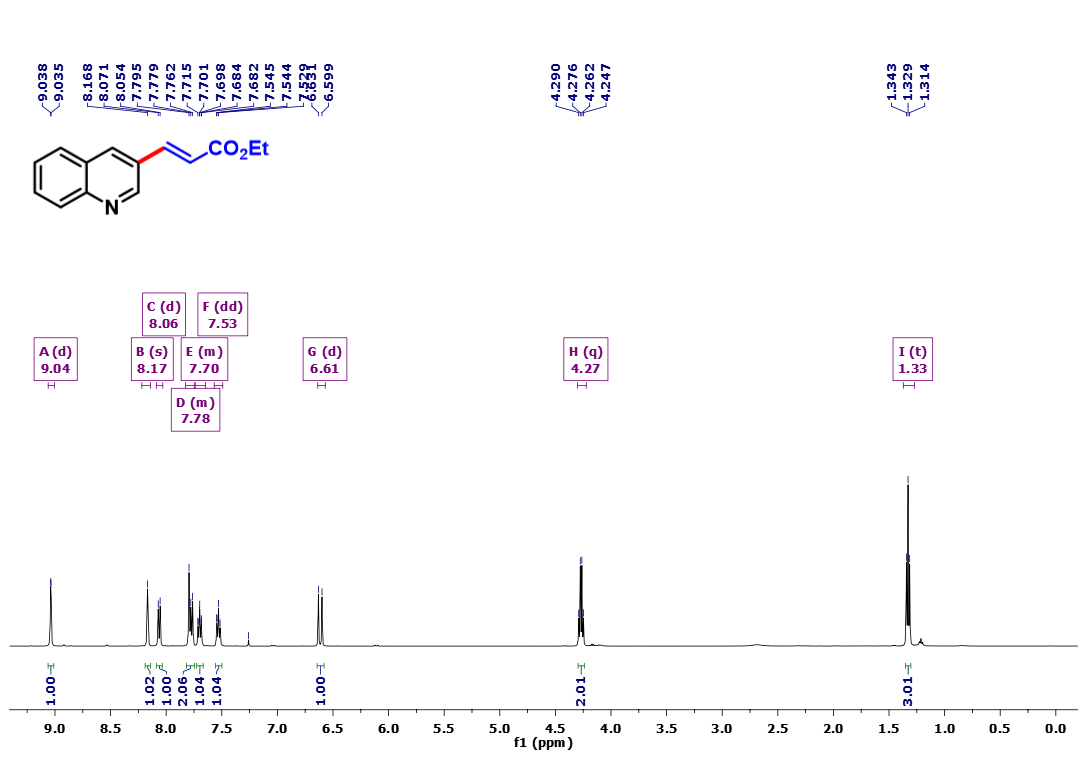


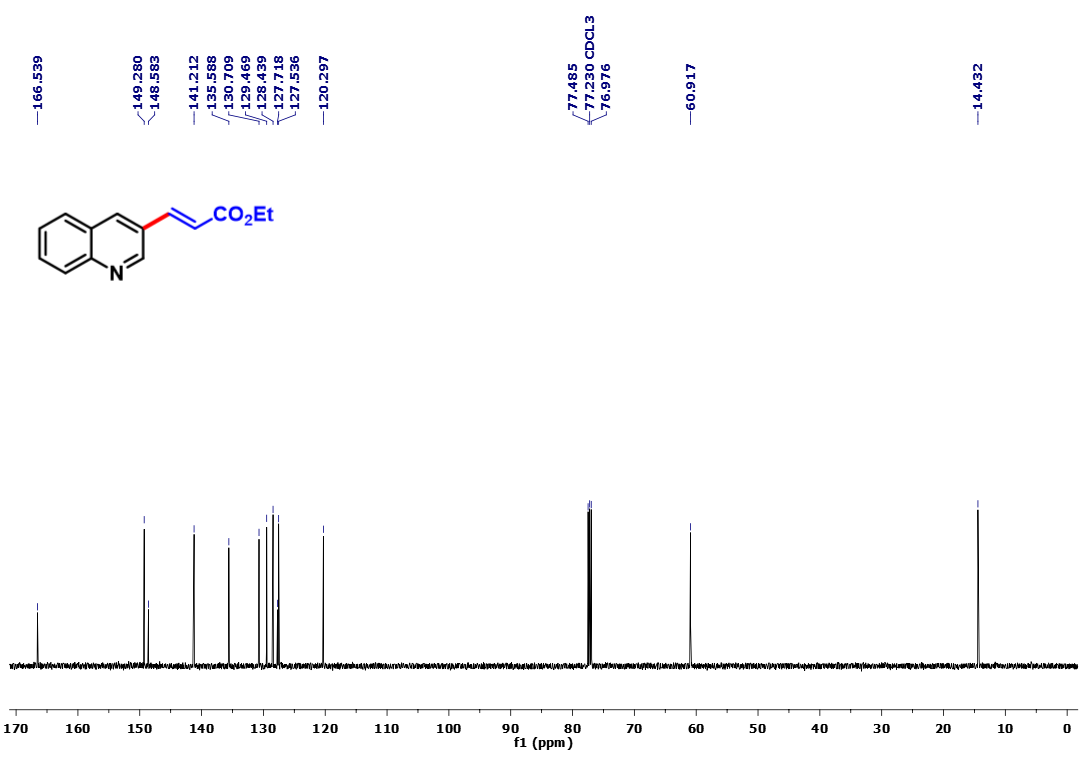


**Methyl (*E*)-3-(1-methyl-1H-indol-3-yl)acrylate (39):**


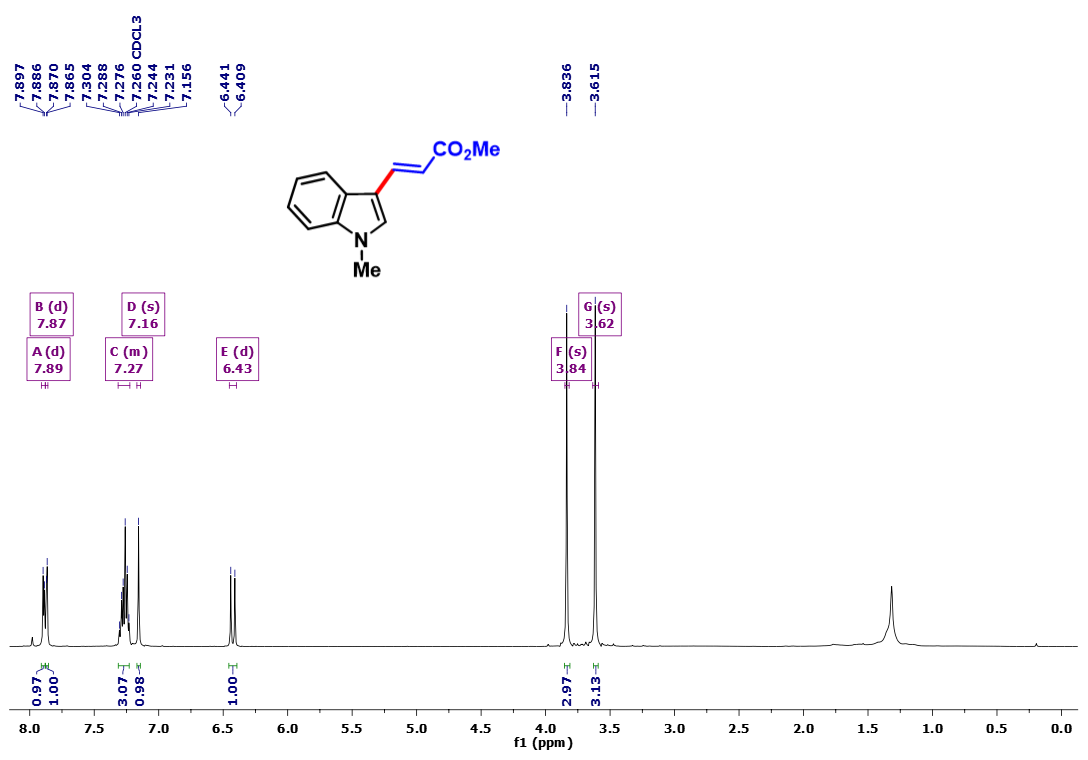


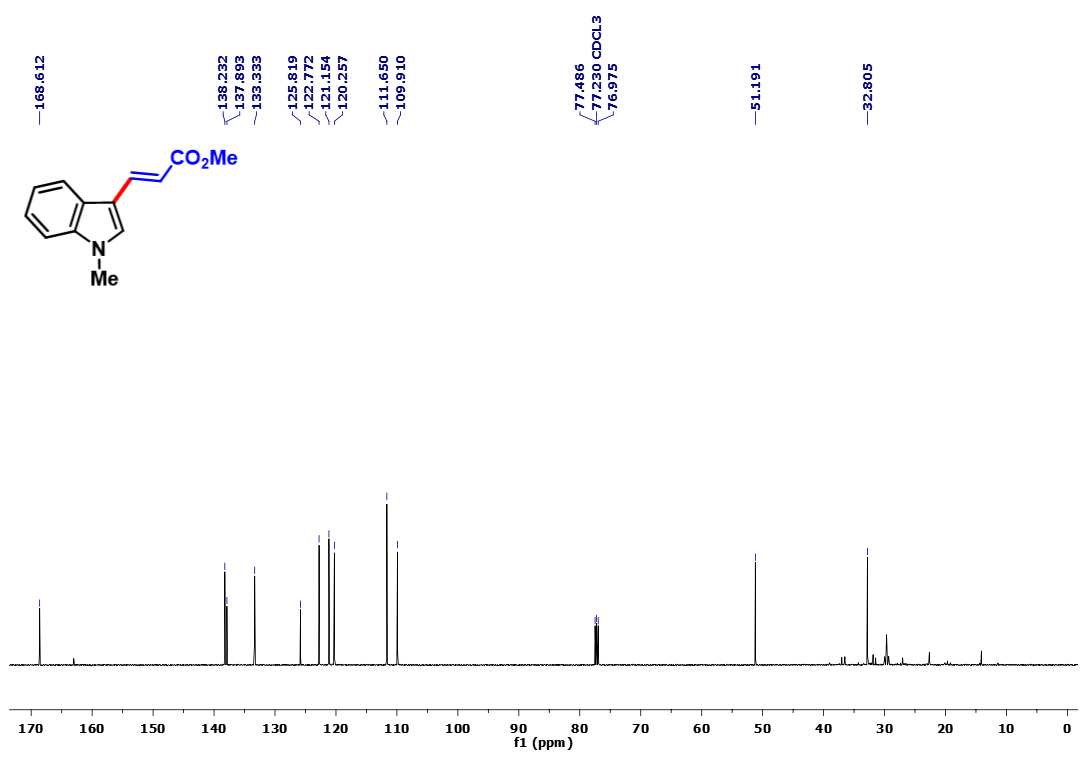


**Methyl (*E*)-3-(benzo[d]thiazol-2-yl)acrylate (40):**


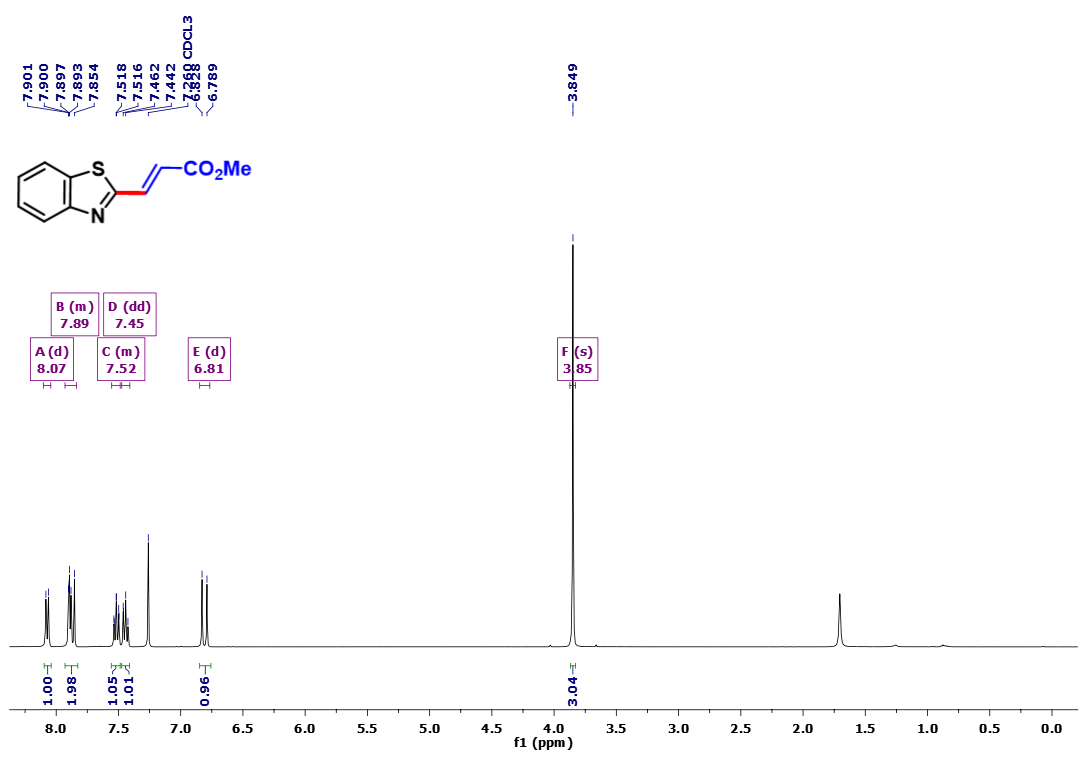


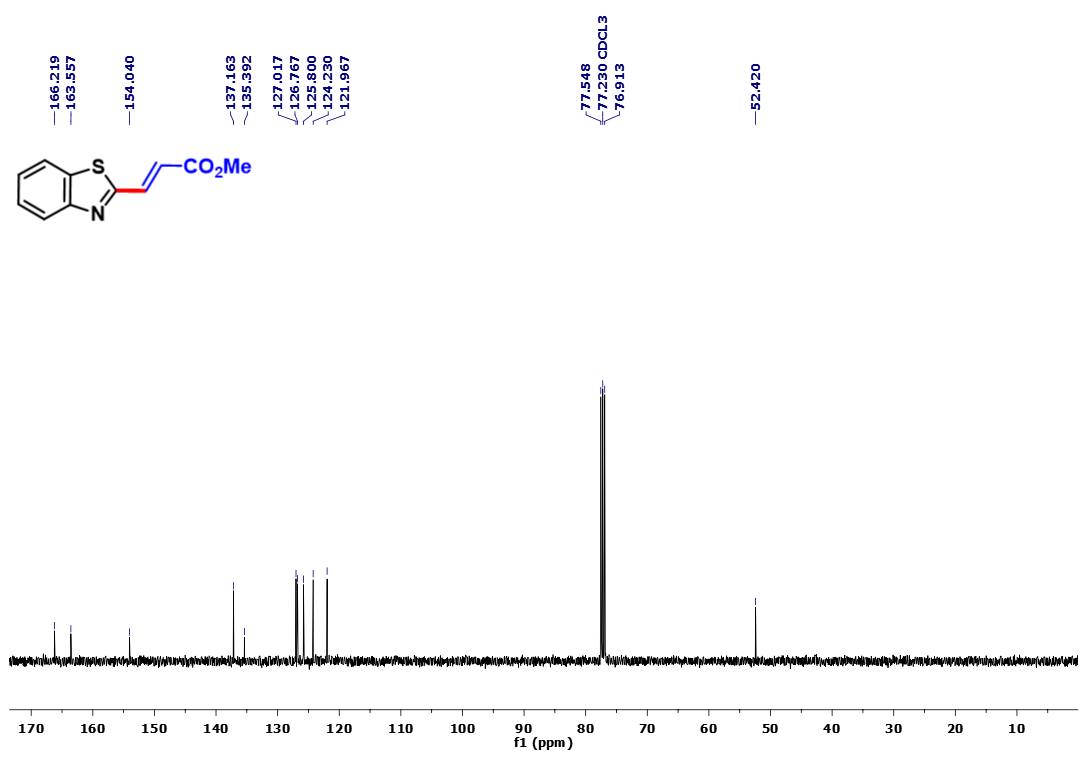


**Ethyl (*E*)-3-(9-methyl-9H-carbazol-3-yl)acrylate (41):**


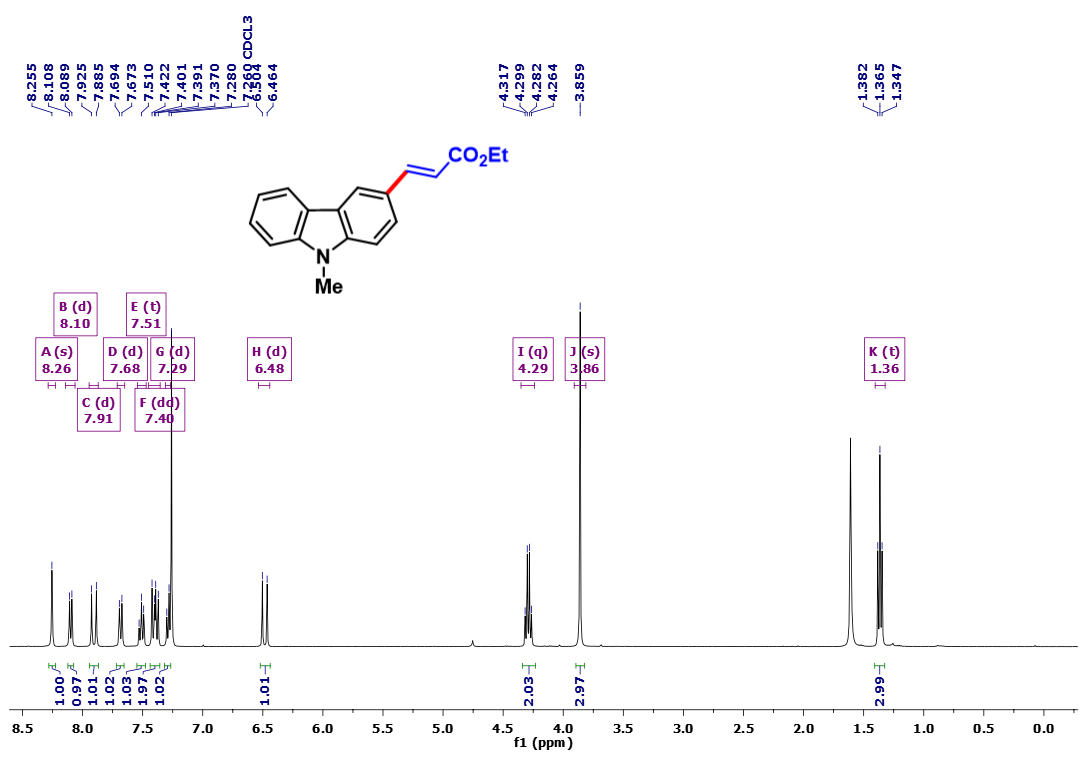


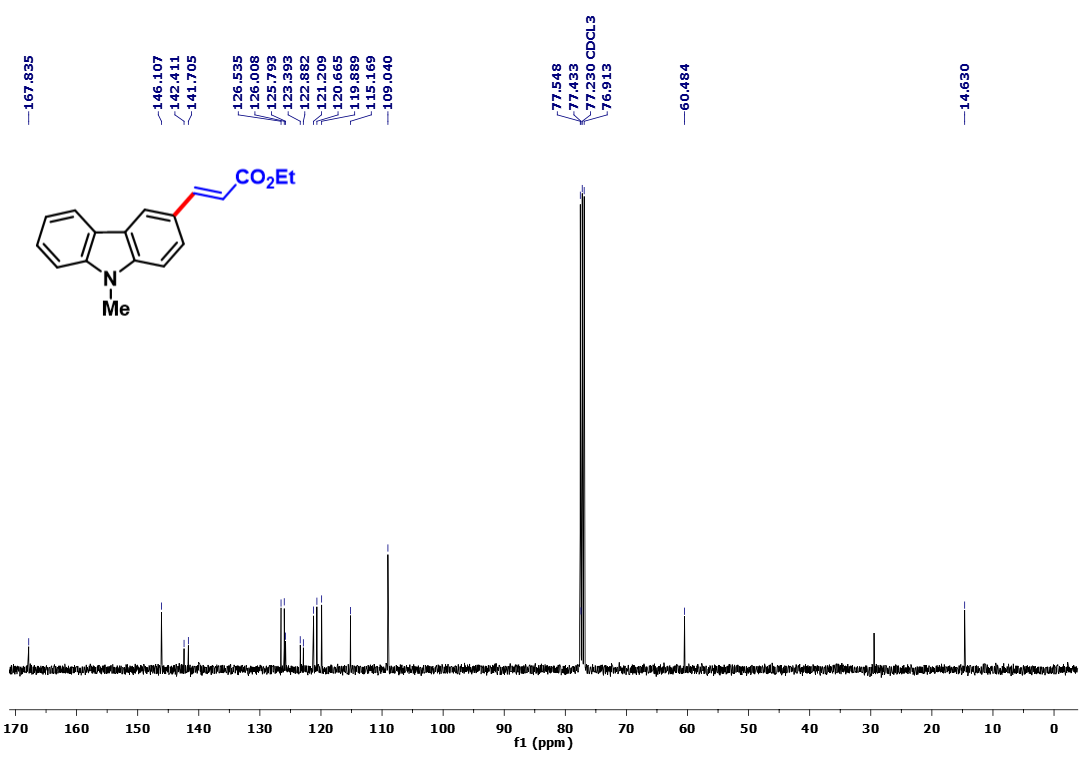


**(8*R*,9*R*,10*S*,13*S*,14*R*,17*S*)-10,13-Dimethyl-17-((*S*)-6-methylheptan-2-yl)-2,3,4,7,8,9,10,11,12,13,14,15,16,17-tetradecahydro-1H-cyclopenta[a]phenanthren-3-yl (*E*)-3-(*p*-tolyl)acrylate (42):**


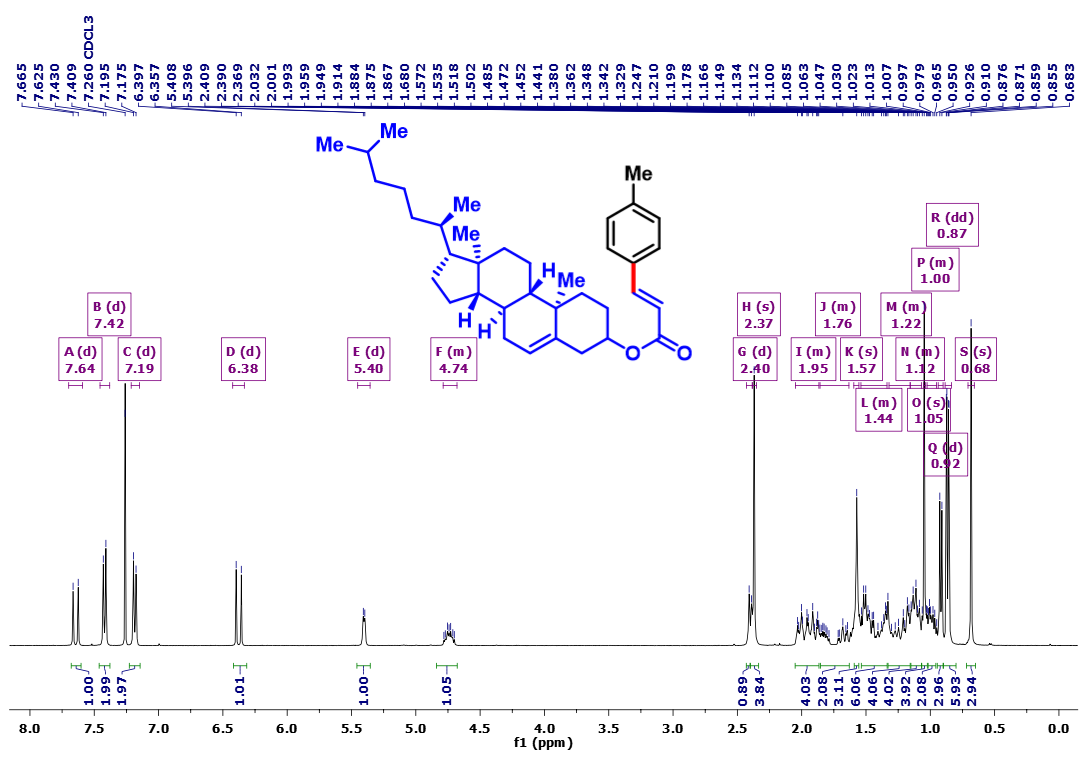


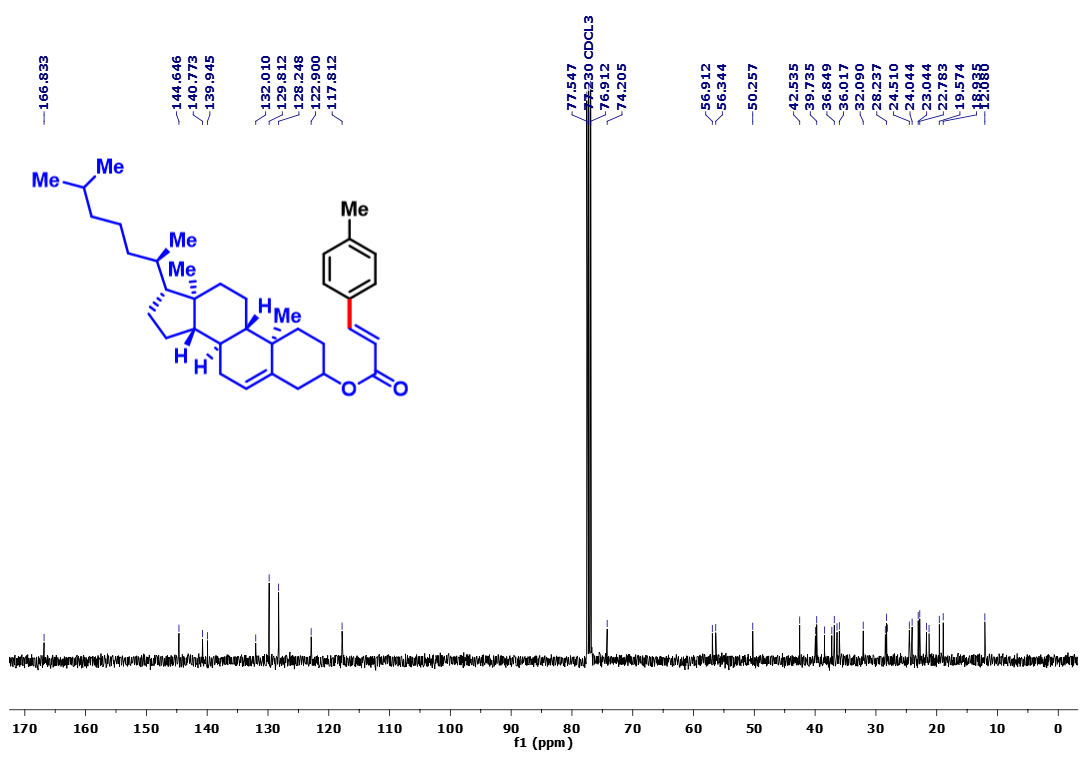


**(*Z*)-3,7-Dimethylocta-2,6-dien-1-yl (*E*)-3-([1,1'-biphenyl]-4-yl)acrylate (43):**


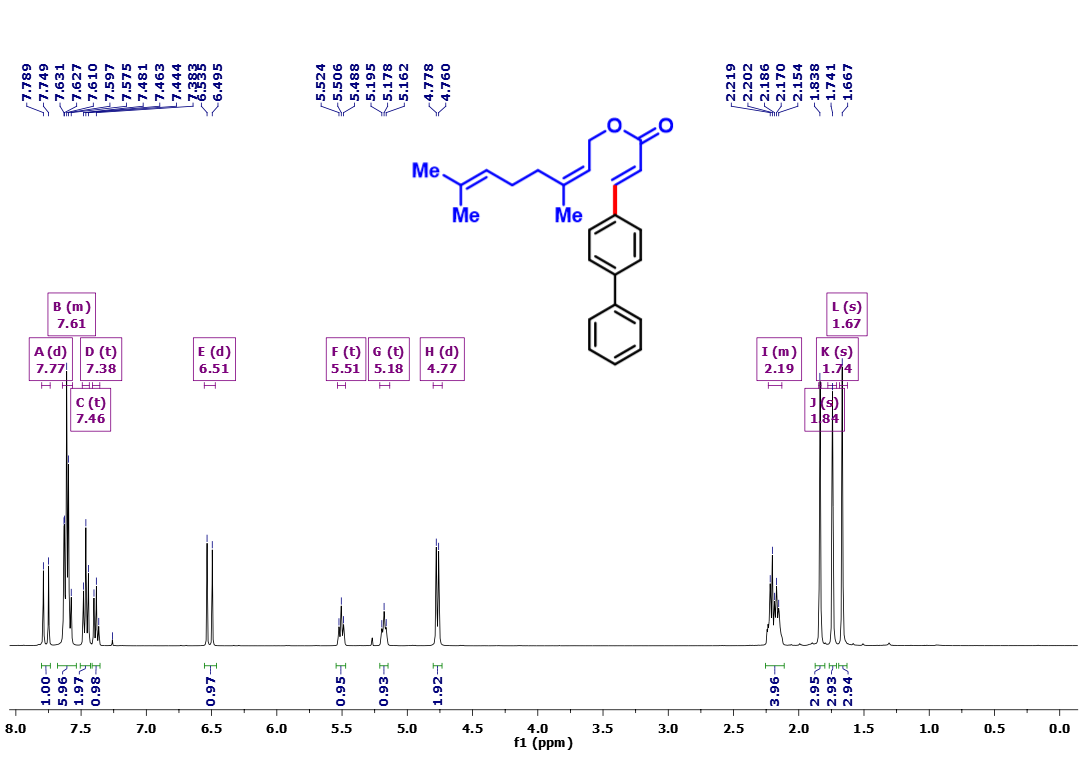


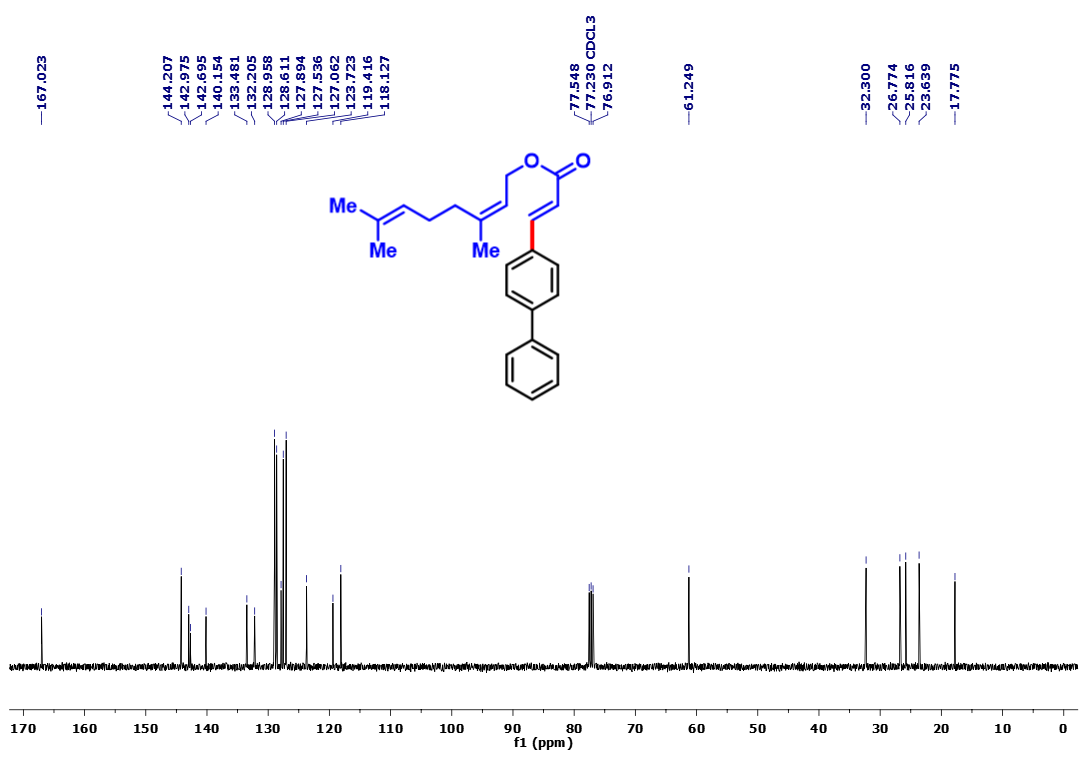


**1,3,3-Trimethylbicyclo[2.2.1]heptan-2-yl (*E*)-3-(3,4-dimethoxyphenyl)acrylate (44):**


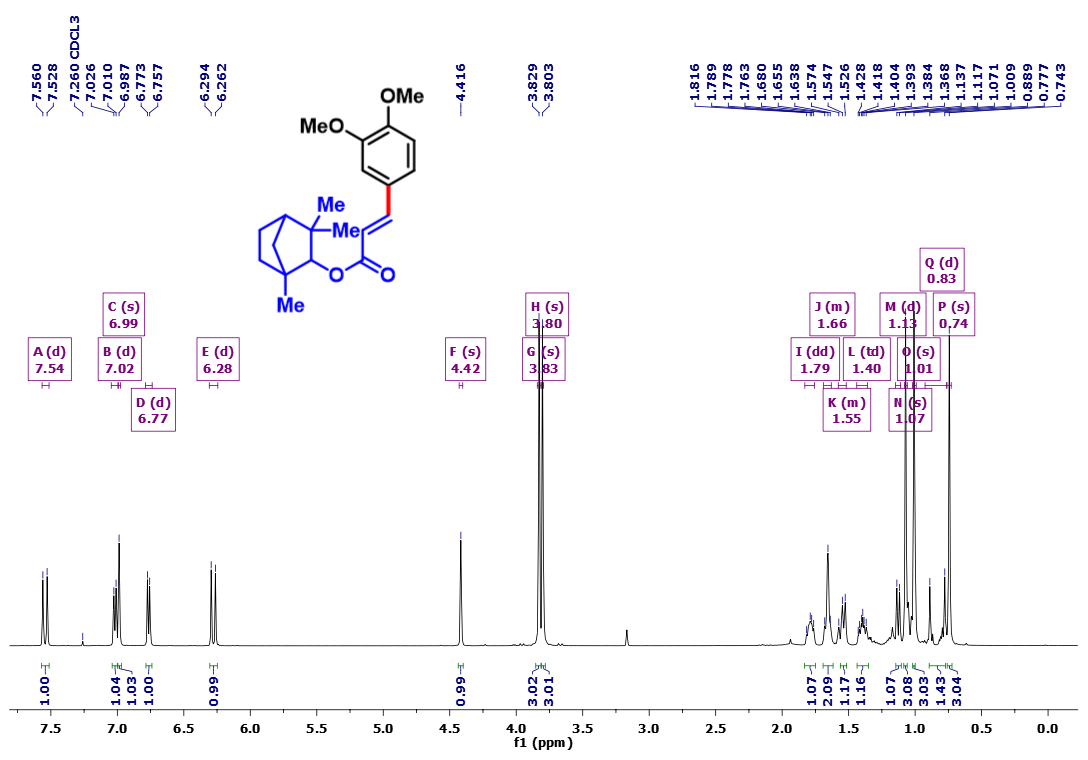


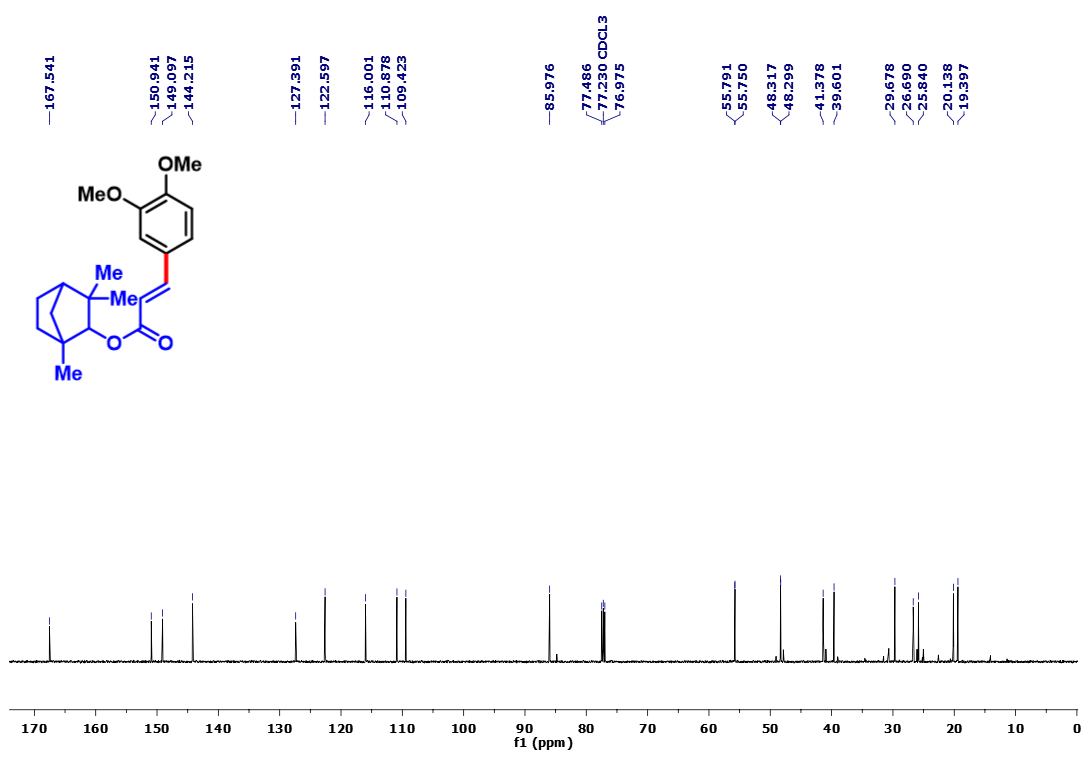


**(*S*)-2,8-Dimethyl-2-((4*S*,8*S*)-4,8,12-trimethyltridecyl)chroman-6-yl (*E*)-3-(2-fluorophenyl)acrylate (45):**


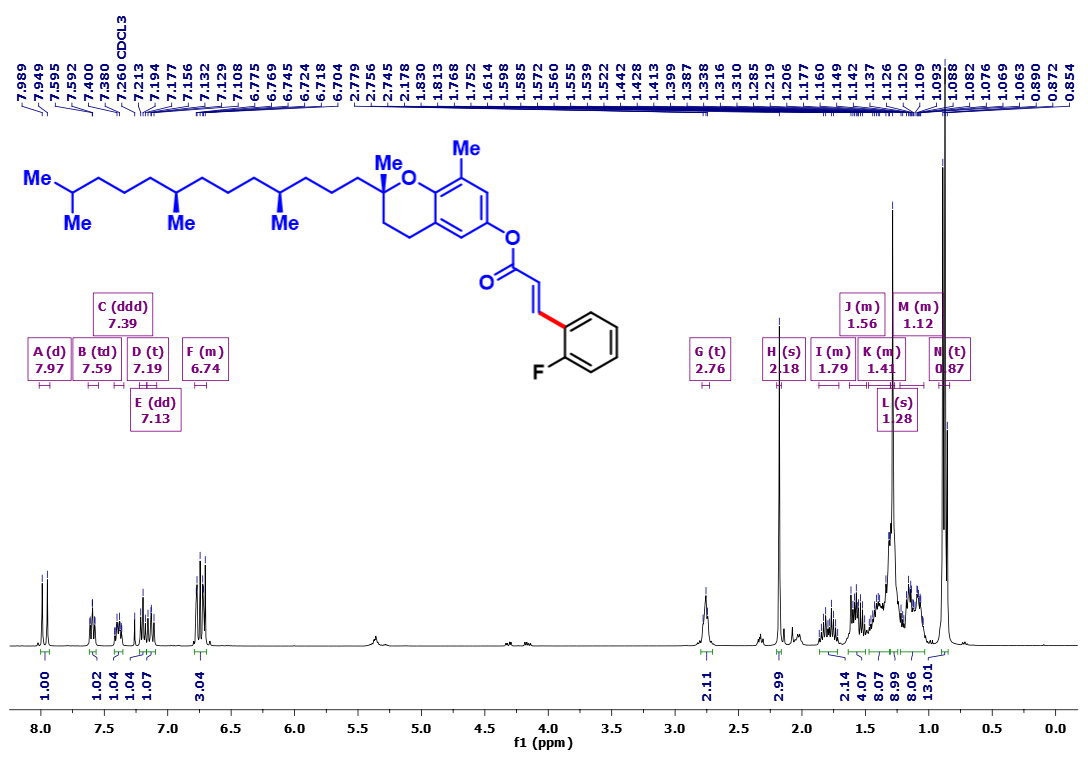


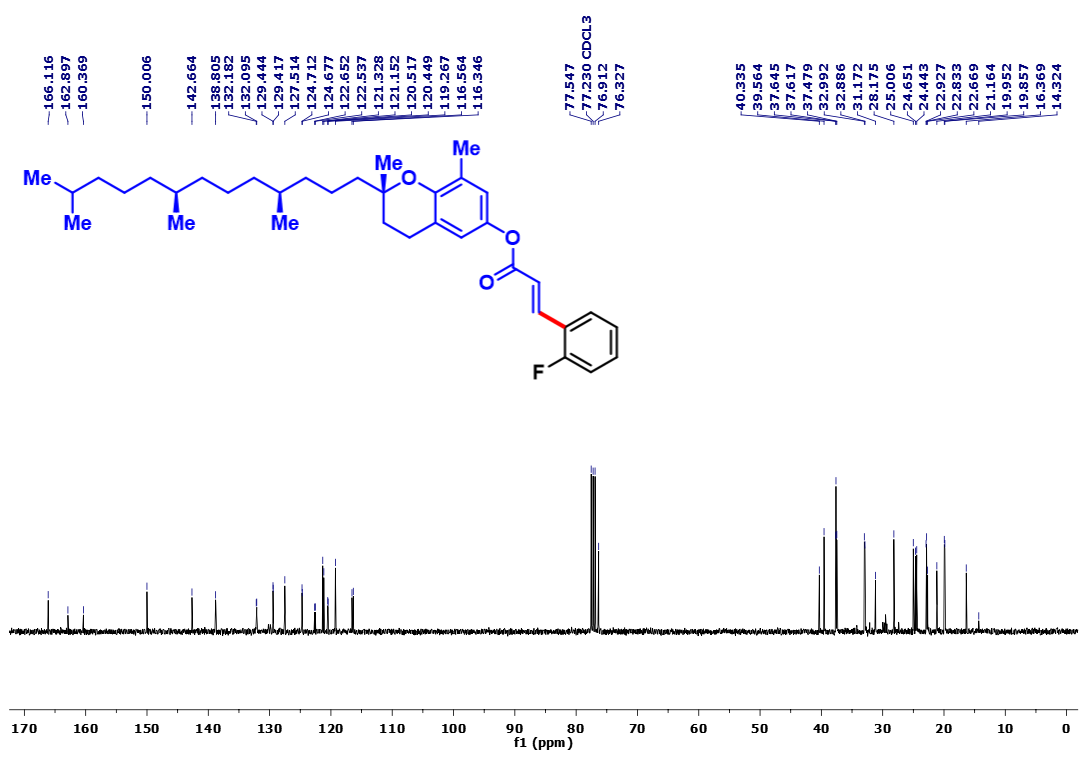


**(*Z*)-Octadec-9-en-1-yl (*E*)-3-(4-methoxyphenyl)acrylate (46):**


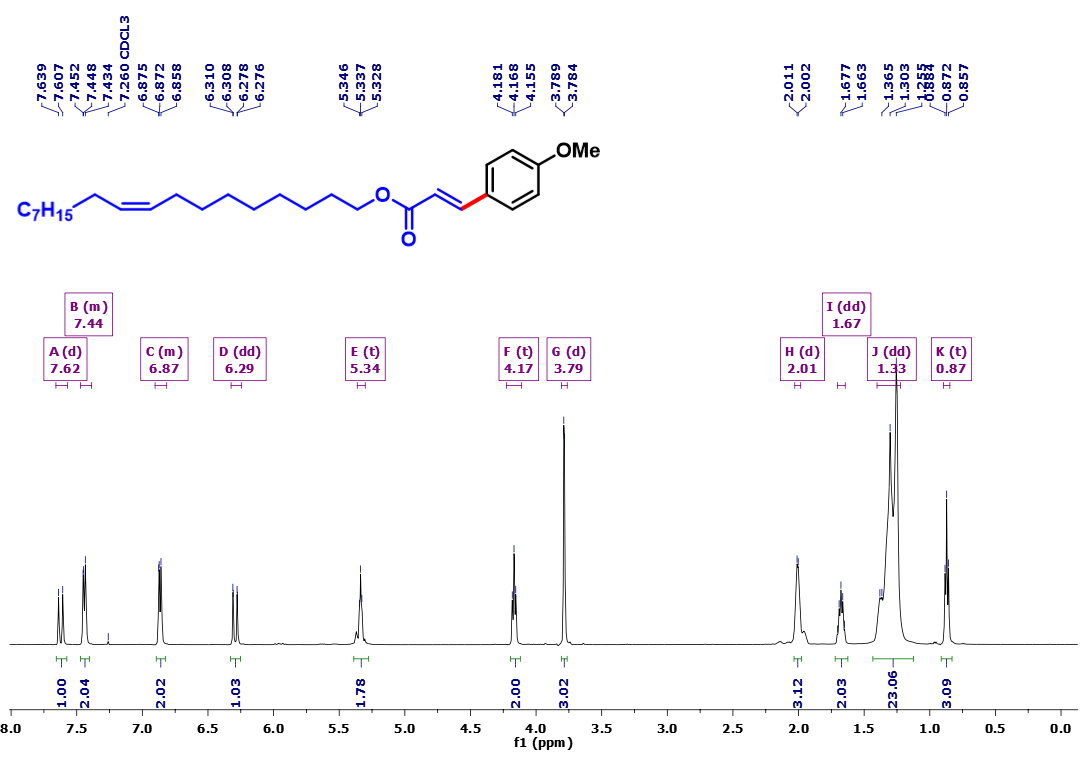


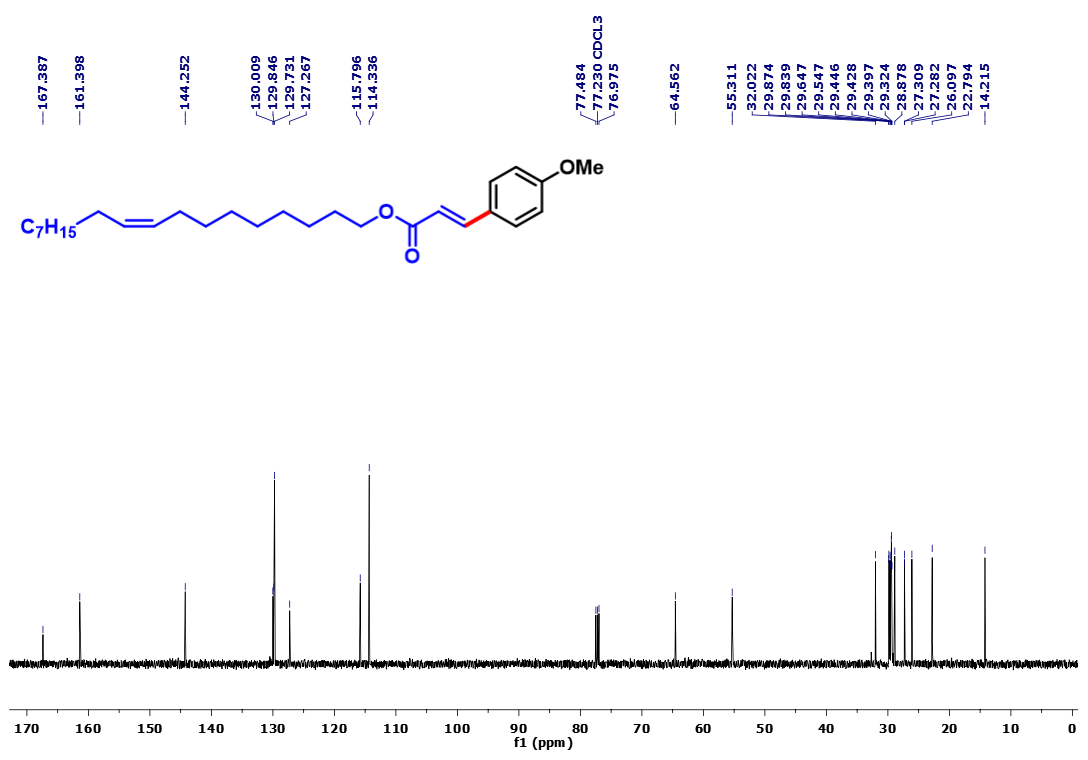


**2-Methoxy-4-((*E*)-3-oxo-3-(((2a*S*,3*S*,5a*R*,5b*R*,7a*S*,9*R*,11a*S*,12a*R*)-2a,5a,8,8-tetramethyl-3-((*S*)-6-methylhept-5-en-2-yl)tetradecahydro-1H,12H-cyclopenta[a]cyclopropa[e]phenanthren-9-yl)oxy)prop-1-en-1-yl)phenyl (*E*)-3-(4-hydroxy-3-methoxyphenyl)acrylate (47):**


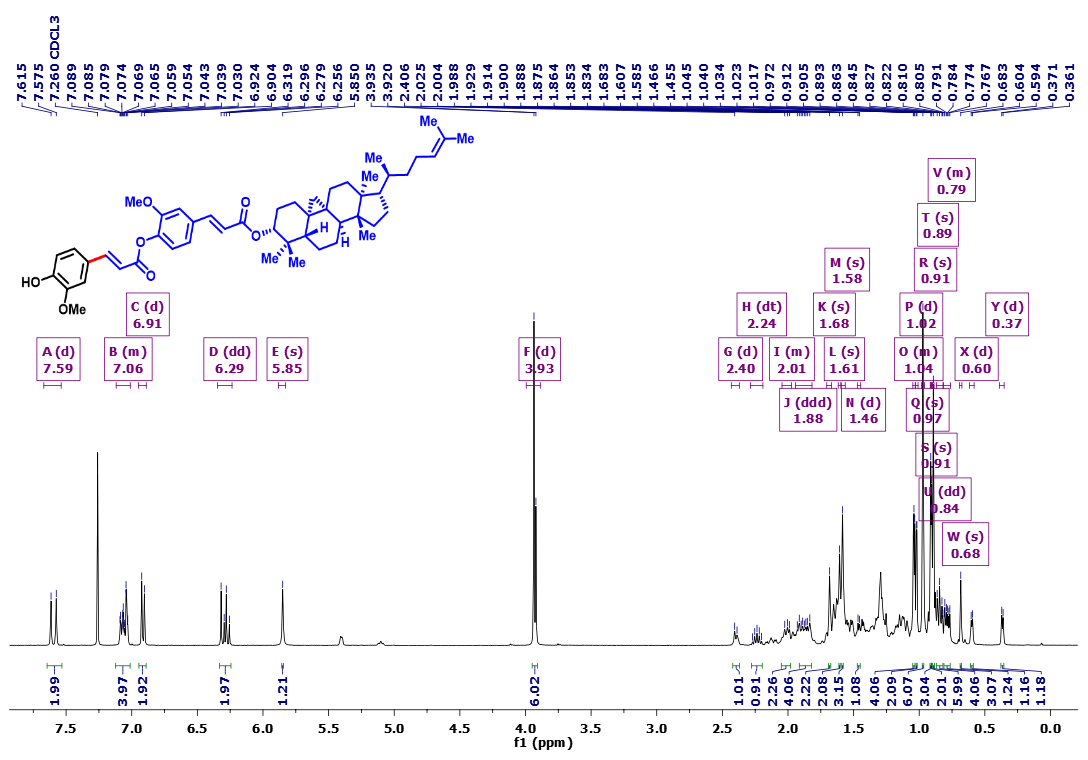


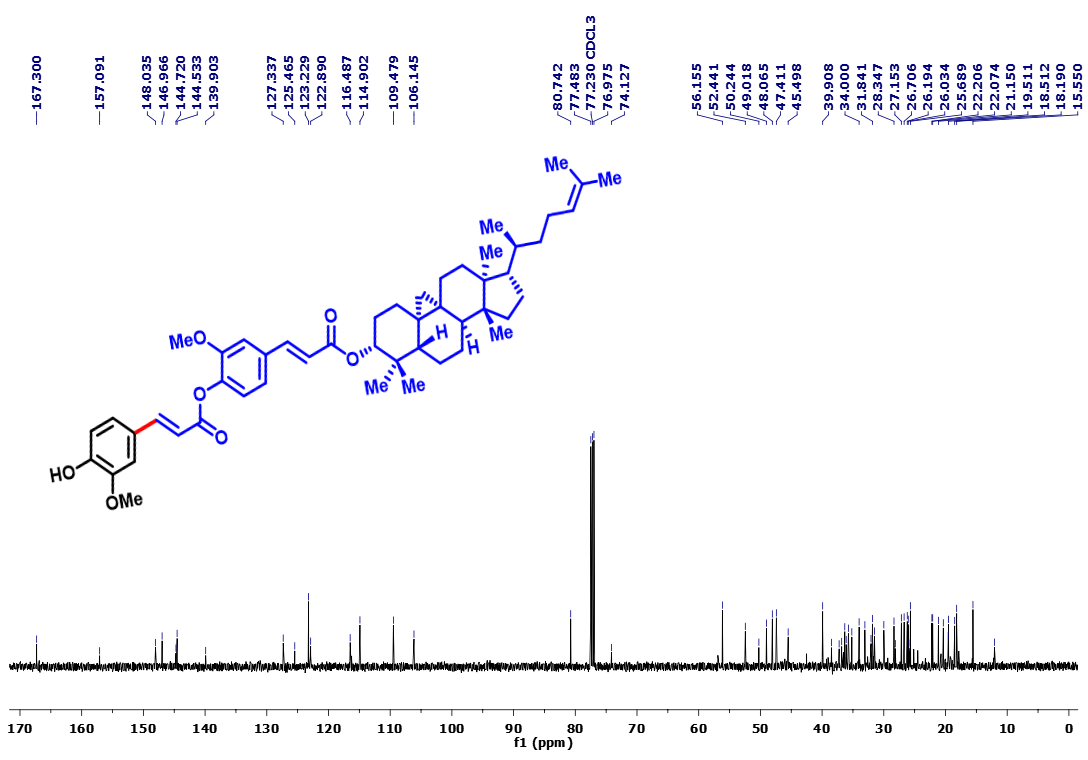


**(8*R*,9*S*,10*S*,13*S*,14*S*,17*S*)-17-Acetyl-10,13-dimethylhexadecahydro-1H-cyclopenta[a]phenanthren-3-yl (*E*)-3-(3,4,5-trimethoxyphenyl)acrylate (48):**


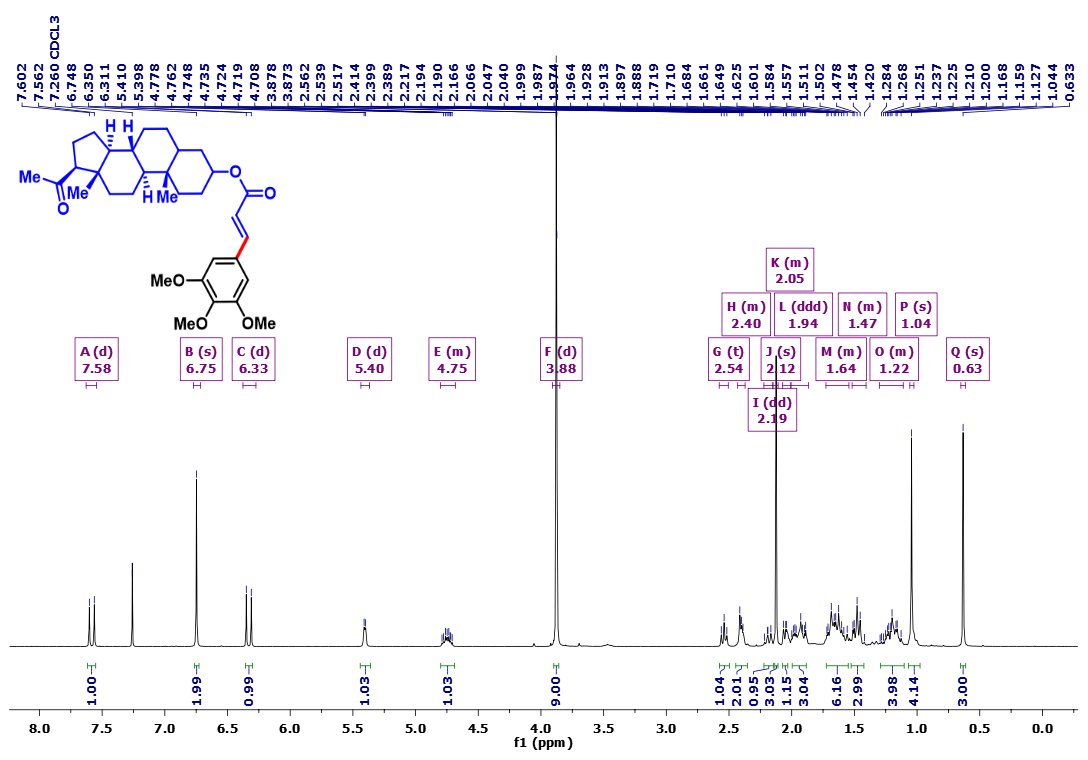


**(9*R*,10*S*,13*S*,14*S*,17*S*)-17-((2S,5S,*E*)-5,6-Dimethylhept-3-en-2-yl)-10,13-dimethyl-2,3,4,9,10,11,12,13,14,15,16,17-dodecahydro-1H-cyclopenta[a]phenanthren-3-yl (*E*)-3-(benzo[d][1,3]dioxol-5-yl)acrylate (49):**

**(8*S*,9*R*,13*R*,14*R*)-13-Methyl-17-oxo-7,8,9,11,12,13,14,15,16,17-decahydro-6H-cyclopenta[a]phenanthren-3-yl (*E*)-3-(thiophen-3-yl)acrylate (50):**

**(*E*)-3,7-Dimethylocta-2,6-dien-1-yl (*E*)-3-(furan-3-yl)acrylate (51):**

**3,7-Dimethyloct-6-en-1-yl (*E*)-3-(pyridin-3-yl)acrylate (52):**

**Ethyl (*E*)-3-(2-acetamidophenyl)acrylate (53):**

**Dodecyl (*E*)-3-(2-acetamidophenyl)acrylate (54):**

**(4*S*,7*S*)-Octahydro-1*H*-4,7-methanoinden-5-yl (*E*)-3-(2-acetamidophenyl)acrylate (55):**

**(*E*)-*N*-(2-(3-Oxobut-1-en-1-yl)phenyl)acetamide (56):**

**(*E*)-*N*-(4-Acetyl-2-(2-(phenylsulfonyl)vinyl)phenyl)acetamide (57):**

**Methyl (*E*)-4-acetamido-3-(3-((2,2,3,3,4,4,5,5,6,6,7,7-dodecafluoroheptyl)oxy)-3-oxoprop-1-en-1-yl)benzoate (58):**

**(*E*)-N-(5-Methoxy-2-(2-(methylsulfonyl)vinyl)phenyl)acetamide (59):**

**Methyl (*E*)-3-(1-pivalamidonaphthalen-2-yl)acrylate (60):**

**Butyl (*E*)-3-(1-pivalamidonaphthalen-2-yl)acrylate (61):**

**Methyl (*E*)-3-(2-((hydroxydiisopropylsilyl)methyl)phenyl)acrylate (62):**

**Butyl (*E*)-3-(2-((hydroxydiisopropylsilyl)methyl)-3-methylphenyl)acrylate (63):**

**Ethyl (*E*)-3-(4-chloro-3-fluoro-2-((hydroxydiisopropylsilyl)methyl)phenyl)acrylate (64):**

**Ethyl (*E*)-3-(1-(4,5-dimethoxy-2-((*E*)-(methoxyimino)methyl)phenyl)naphthalen-2-yl)acrylate (65):**

**(*E*)-4,5-Dimethoxy-2-(2-((*E*)-2-(phenylsulfonyl)vinyl)naphthalen-1-yl)benzaldehyde O-methyl oxime (66):**

**Ethyl (*E*)-3-(3-(((2-cyano-5-methoxyphenoxy)sulfonyl)methyl)phenyl)acrylate (67):**

**2-Cyano-5-methoxyphenyl (*E*)-(3-(2-(phenylsulfonyl)vinyl)phenyl)methanesulfonate (68):**

**Dimethyl 2-(3-(((2-cyano-5-methoxyphenoxy)sulfonyl)methyl)phenyl)maleate (69):**

**2-Cyano-5-metoxyphenyl 3-(1-methyl-2,5-dioxo-2,5-dihydro-1*H*- pyrrol-3-yl)phenyl)methanesulfonate (70):**

**2-Cyano-5-methoxyphenyl (*E*)-(3-(2-(diethoxyphosphoryl)vinyl)-4-methylphenyl)methanesulfonate (71):**

**Methyl (*E*)-3-(5-(((2-cyano-5-methoxyphenoxy)sulfonyl)methyl)-2-fluoro-4-(trifluoromethyl)phenyl)acrylate (72):**

**Ethyl (*E*)-3-(3-(((2-cyano-4-methoxyphenoxy)diisopropylsilyl)methyl)phenyl)acrylate (73):**

**(*S*)-2-(((5-(2-Acetylcyclopent-2-en-1-yl)-2,3-dimethylbenzyl)diisopropylsilyl)oxy)-5-methoxybenzonitrile (74):**

**2-Cyano-5-methoxyphenyl ethyl (*E*)-(3-methoxy-5-(3-oxobut-1-en-1-yl)benzyl)phosphonate (75):**

**2-Cyano-5-methoxyphenyl ethyl (*E*)-(2,6-dichloro-3-(2-(phenylsulfonyl)vinyl)benzyl)phosphonate (76):**

**Ethyl (*E*)-3-(4-chloro-3-(2-(2-cyano-5-methoxyphenoxy)-2-oxoethyl)-2-fluorophenyl)acrylate (77):**

**2-(2-Cyano-5-methoxyphenoxy)ethyl (*E*)-2-(2,6-dichloro-3-(2-(methylsulfonyl)vinyl)phenyl)acetate (78):**

**Methyl (*E*)-3-(2,4-dichloro-3-(2-(3-(2-cyano-5-methoxyphenoxy)propoxy)-2-oxoethyl)phenyl)acrylate (79):**

**Ethyl (*E*)-3-(2,4-dichloro-3-(2-((5-(2-cyano-5-methoxyphenoxy)pentyl)oxy)-2-oxoethyl)phenyl)acrylate (80):**

**2-Cyano-5-methoxyphenyl (*E*)-3'-(3-oxo-1-phenylprop-1-en-1-yl)-[1,1'-biphenyl]-2-carboxylate (81):**

**Ethyl (*E*)-3-(4-chloro-3-(2-((2-cyanophenyl)amino)-2-oxoethyl)-2-fluorophenyl)acrylate (82):**

**Ethyl(*E*)-3-(5-(1-(2-cyano-4-methoxyphenoxy)-1-oxopropan-2-yl)-2-isobutylphenyl)acrylate (83):**

**Methyl (*E*)-3-(2-chloro-5-((1-(2-cyano-5-methoxyphenoxy)-2-methyl-1-oxopropan-2-yl)oxy)phenyl)acrylate (84):**

**Methyl (*E*)-3-(4-((((2'-cyano-4',5'-dimethoxy-[1,1'-biphenyl]-4-yl)oxy)diisopropylsilyl)methyl)phenyl)acrylate (85):**

**2,2,3,3,4,4,5,5,6,6,7,7-Dodecafluoroheptyl (*E*)-3-(4-((((2'-cyano-4',5'-dimethoxy-[1,1'-biphenyl]-4-yl)oxy)diisopropylsilyl)methyl)phenyl)acrylate (86):**

**4'-((Diisopropyl(4-(3-oxobut-1-en-1-yl)benzyl)silyl)oxy)-4,5-dimethoxy-[1,1'-biphenyl]-2-carbonitrile (87):**

**4'-((Diisopropyl(4-(3-oxobut-1-en-1-yl)benzyl)silyl)oxy)-4,5-dimethoxy-[1,1'-biphenyl]-2-carbonitrile (88):**

**Dimethyl2-(4-((((2'-cyano-4',5'-dimethoxy-[1,1'-biphenyl]-4-yl)oxy)diisopropylsilyl)methyl)-2-fluorophenyl)maleate (89):**

**Dimethyl 2-(4-((((2'-cyano-4',5'-dimethoxy-[1,1'-biphenyl]-4-yl)oxy)diisopropylsilyl)methyl)-2-fluoro-5-methylphenyl)maleate (90):**

**Ethyl (*E*)-3-(4-((((2'-cyano-4',5'-dimethoxy-[1,1'-biphenyl]-4-yl)oxy)diisopropylsilyl)methyl)-2,5-difluorophenyl)acrylate (91):**

**Methyl (*E*)-3-(2,3-dichloro-4-((((2'-cyano-4',5'-dimethoxy-[1,1'-biphenyl]-4-yl)oxy)diisopropylsilyl)methyl)phenyl)acrylate (92):**

**Methyl (*E*)-3-(4-((((2'-cyano-4',5'-dimethoxy-[1,1'-biphenyl]-4-yl)oxy)diisopropylsilyl)methyl)-3-fluoro-5-methoxyphenyl)acrylate (93):**

**4'-(((2,6-Difluoro-4-(2-(phenylsulfonyl)vinyl)benzyl)diisopropylsilyl)oxy)-4,5-dimethoxy-[1,1'-biphenyl]-2-carbonitrile (94):**

**(*E*)-3-(3,4-Dihydroxyphenyl)acrylic acid (95):**

**(*E*)-3-(4-Hydroxy-3-methoxyphenyl)acrylic acid (96):**

**(*E*)-3-(4-Hydroxyphenyl)acrylic acid (97):**

**1,3,3-Trimethylbicyclo[2.2.1]heptan-2-yl (*E*)-3-(4-methoxyphenyl)acrylate (98):**

**Propyl (*E*)-3-(3,4-dimethoxyphenyl)acrylate (99):**

**(1*E*,6*E*)-1,7-Bis(4-hydroxy-3-methoxyphenyl)hepta-1,6-diene-3,5-dione (100):**

**Methyl (*E*)-3-(4-hydroxy-3-(3-methylbut-2-en-1-yl)phenyl)acrylate (101):**

**(*E*)-3-(4-Hydroxy-3-(3-methylbut-2-en-1-yl)phenyl)acrylic acid (102):**

**(*E*)-3-(4-Hydroxy-3,5-bis(3-methylbut-2-en-1-yl)phenyl)acrylic acid (103):**

**Butyl (*E*)-3-(1,3-dimethyl-2,4-dioxo-1,2,3,4-tetrahydropyrimidin-5-yl)acrylate (104):**

**Butyl (*E*)-3-(1,3,7-trimethyl-2,6-dioxo-2,3,6,7-tetrahydro-1H-purin-8-yl)acrylate (105):**

**Ethyl (*E*)-3-((8*R*,9*S*,13*S*,14*S*)-3-methoxy-13-methyl-17-oxo-7,8,9,11,12,13,14,15,16,17-decahydro-6H-cyclopenta[a]phenanthren-2-yl)acrylate (106):**

**Ethyl (*E*)-3-(1,4(1,4)-dibenzenacyclohexaphane-12-yl)acrylate (107):**

**Ethyl (*E*)-3-(2-(*N*,*N*-dimethylsulfamoyl)-5-(5-(*p*-tolyl)-3-(trifluoromethyl)-1H-pyrazol-1-yl)phenyl)acrylate (108):**

**Ethyl (*E*)-3-(3,5-dimethoxy-2-(2-methoxy-2-oxoethyl)phenyl)acrylate (109):**

**Ethyl (*E*)-3-(2-(1-methoxy-1-oxopropan-2-yl)-5-(1-oxoisoindolin-2-yl)phenyl)acrylate (110):**

**Ethyl (*E*)-3-(2'-fluoro-4'-(1-methoxy-1-oxopropan-2-yl)-[1,1'-biphenyl]-3-yl)acrylate (111):**

**Ethyl (*E*)-3-(4-benzoyl-2-(1-methoxy-1-oxopropan-2-yl)phenyl)acrylate (112):**

**Ethyl (*E*)-3-(5-isobutyl-2-(1-methoxy-1-oxopropan-2-yl)phenyl)acrylate (113):**

**Methyl (*E*)-4-(3'-(3-ethoxy-3-oxoprop-1-en-1-yl)-[1,1'-biphenyl]-4-yl)-4-oxobutanoate (114):**

**Ethyl (*E*)-3-((4a*R*,4a1*R*,5a*S*,8a*R*,8a1*S*,15a*S*)-14-oxo-2,4a,4a1,5,5a,7,8,8a1,15,15a-decahydro-14H-4,6-methanoindolo[3,2,1-ij]oxepino[2,3,4-de]pyrrolo[2,3-h]quinolin-10-yl)acrylate (115):**

**Bis(2-cyano-5-methoxyphenyl) [1,1'-biphenyl]-3,3'-diyldimethanesulfonate (116):**

**6. Chromatogram of HPLC Analysis:**

**65.** AD-H, n-hexane/2-propanol = 95/5, v = 1.0 mL⋅min-1, λ = 290 nm

| Peak | Retention time | Area (%) |
| --- | --- | --- |
| 1 | 5.897 | 47.6674 |
| 2 | 6.998 | 47.8428 |

| Peak | Retention time | Area (%) |
| --- | --- | --- |
| 1 | 4.354 | 96.1072 |
| 2 | 5.043 | 3.8928 |

**66.** AD-H, n-hexane/2-propanol = 95/5, v = 1.0 mL⋅min-1, λ = 270 nm

| Peak | Retention time | Area (%) |
| --- | --- | --- |
| 1 | 12.447 | 50.146 |
| 2 | 16.663 | 49.854 |

| Peak | Retention time | Area (%) |
| --- | --- | --- |
| 1 | 12.487 | 9.471 |
| 2 | 16.600 | 90.529 |
